# Supplementary material for: Non-targeted identification and semi-quantitation of emerging per- and polyfluoroalkyl substances (PFAS) in US rainwater
Source: Royal Society of Chemistry journal article supplement (doi:10.1039/d2em00349j), 2022-11-03
Supplement: d2em00349j1.pdf [file d2em00349j1.pdf]

## Supplemental Information

### **Non-Targeted Identification and Semi-Quantitation of Emerging Per- and Polyfluoroalkyl Substances (PFAS) in US Rainwater**

Yubin Kim, Kyndal A. Pike, Rebekah Gray, Jameson W. Sprankle, Jennifer A. Faust, Paul L. Edmiston

#### **Contents**

|                                                                                                                           |    |
|---------------------------------------------------------------------------------------------------------------------------|----|
| Table S1. PFAS Class Acronyms.....                                                                                        | 3  |
| Table S2. Number of samples and blanks .....                                                                              | 3  |
| Table S3. HPLC-QTOF Instrument Parameters .....                                                                           | 4  |
| Table S4. MS-DIAL v4.60 Parameters .....                                                                                  | 5  |
| Table S5. Mass labelled standards detected by HPLC-QTOF and number of detections per 93 samples..                         | 6  |
| Table S6. SPE Recoveries .....                                                                                            | 7  |
| Table S7. PFAS Concentrations in Blanks from Pike et al. (2021).....                                                      | 7  |
| Table S8. Retention time and peak area variance of PFAS standards (linear isomers, $n = 5$ ) .....                        | 8  |
| Table S9. Retention time and peak area variance of PFAS standards in the pooled sample and calibration standard .....     | 9  |
| Table S10. Additional emerging PFAS identified in precipitation by QTOF MS/MS .....                                       | 10 |
| Table S11. Minimum, maximum, and median PFAS concentrations ( $\text{ng L}^{-1}$ ) at each collection site ....           | 11 |
| Table S12. Minimum, maximum, and median deposition fluxes ( $\text{ng m}^{-2}$ ) at each collection site.....             | 14 |
| Table S13. Average and standard deviation of PFAS concentrations in blanks ( $\text{ng L}^{-1}$ ) .....                   | 17 |
| Table S14. Kruskal-Wallis test comparing EPA-monitored and emerging PFAS at each sampling site                            | 18 |
| Table S15. Kruskal-Wallis test comparing chain lengths at each sampling site .....                                        | 18 |
| Table S16. Results ( $p$ -values) of Wilcoxon post-hoc test comparing chain lengths.....                                  | 18 |
| Table S17. Results of Kruskal-Wallis test comparing functional class at each sampling site .....                          | 19 |
| Table S18. Results ( $p$ -values) of Wilcoxon post-hoc test comparing functional classes at each sampling site .....      | 20 |
| Table S19. Results of Kruskal-Wallis test comparing sampling sites in terms of functional class.....                      | 21 |
| Table S20. Results ( $p$ -values) of Wilcoxon post-hoc test comparing sampling sites in terms of functional classes ..... | 22 |
| Table S21. PFAS pairs with statistically significant ( $p < 0.05$ ) strong correlations ( $\tau > 0.80$ ) .....           | 23 |
| Table S22. Correlations among PFAS at Wooster.....                                                                        | 26 |
| Table S23. Correlation coefficients between each compound and principal component .....                                   | 27 |
| Figure S1. Map of collection sites.....                                                                                   | 28 |
| Figure S2. Kendrick mass defect plot .....                                                                                | 29 |

|                                                                                              |    |
|----------------------------------------------------------------------------------------------|----|
| Figure S3. Retention times for homologous series .....                                       | 30 |
| Figure S4. Extracted ion chromatograms for PFOA .....                                        | 31 |
| Figure S5. Extracted ion chromatograms for PFHxS .....                                       | 32 |
| Figure S6. Literature comparison of FTCAs and FTUCAs in precipitation .....                  | 33 |
| Figure S7. Boxplot of PFAS deposition flux by chain length grouping and site.....            | 34 |
| Figure S8. Boxplot of PFAS deposition flux comparing functional class within site. ....      | 35 |
| Figure S9. Boxplot of PFAS deposition flux comparing sites within each functional class..... | 36 |
| Figure S10. Scree plot .....                                                                 | 37 |
| Figure S11. Principal component analysis.....                                                | 38 |
| Appendix A: LC-MS/MS Data for Qualified Emerging PFAS (Table 1).....                         | 39 |
| Appendix B: Air Mass Back Trajectories.....                                                  | 63 |
| References.....                                                                              | 70 |

**Table S1.** PFAS Class Acronyms

| Acronym   | Definition                                                                                                            |
|-----------|-----------------------------------------------------------------------------------------------------------------------|
| FTCAs     | Fluorotelomer carboxylic acids                                                                                        |
| FTOHs     | Fluorotelomer alcohols                                                                                                |
| FTUCAs    | Fluorotelomer unsaturated carboxylic acids                                                                            |
| H-PFCAs   | H-substituted perfluorocarboxylic acids (single F atom to H atom substitution)                                        |
| H-PFdiCAs | H-substituted perfluoro dicarboxylic acids                                                                            |
| oPFsAs    | Odd perfluoroalkyl sulfonic acids (alternating CH <sub>2</sub> and CF <sub>2</sub> groups in the alkyl chain)         |
| PFCAs     | Perfluorocarboxylic acids                                                                                             |
| PFECAs    | Perfluoroalkyl ether carboxylic acids                                                                                 |
| PFECAs+   | Perfluoroalkyl ether carboxylic acids, unsaturated PFECAs, H-substituted PFECAs, and H-substituted unsaturated PFECAs |
| PFSAs     | Perfluoroalkyl sulfonic acids                                                                                         |

**Table S2.** Number of samples and blanks

| Site               | Number of Samples | Number of Blanks                   |
|--------------------|-------------------|------------------------------------|
| Ashland, OH        | 7                 | 2 site blanks                      |
| Rockford, OH       | 8                 | 2 site blanks <sup>(a)</sup>       |
| Shaker Heights, OH | 10                | 0                                  |
| Whitestown, IN     | 5                 | 2 site blanks + 1 ride-along blank |
| Willoughby, OH     | 10                | 1 site blank                       |
| Wooster, OH        | 10                | 0 <sup>(b)</sup>                   |
| Jackson Hole, WY   | 3                 | 0 <sup>(b)</sup>                   |

<sup>(a)</sup> One of the site blanks was extracted in duplicate.

<sup>(b)</sup> Site blanks for Wooster and Jackson Hole were analyzed in Pike et al.<sup>1</sup> for targeted measurements by liquid chromatography triple quadrupole mass spectrometry, but insufficient sample volume remained for nontargeted measurements by liquid chromatography quadrupole time-of-flight mass spectrometry.

**Table S3. HPLC-QTOF Instrument Parameters****HPLC Parameters**

|                        |                                  |      |
|------------------------|----------------------------------|------|
| <b>Solvent</b>         |                                  |      |
| Solvent A              | water, 10 mM ammonium acetate    |      |
| Solvent B              | methanol, 10 mM ammonium acetate |      |
|                        |                                  |      |
| <b>Flow rate</b>       | 0.250 mL/min                     |      |
| <b>Temp</b>            | 50°C                             |      |
|                        |                                  |      |
| <b>Solvent Program</b> | A                                | B    |
| 0.00 min               | 60%                              | 40%  |
| 3.00 min               | 60%                              | 40%  |
| 12.00 min              | 35%                              | 65%  |
| 22.00 min              | 0%                               | 100% |
| 27.00 min              | 0%                               | 100% |
|                        |                                  |      |
| <b>Post time</b>       | 5 min                            |      |
| <b>Inj. volume</b>     | 7 µL (with needle wash)          |      |

**QTOF Parameters**

|                         |                          |
|-------------------------|--------------------------|
| <b>Mode</b>             | Negative ion             |
| <b>Needle voltage</b>   | -4,000 V                 |
| <b>Nozzle voltage</b>   | 500 V                    |
| <b>Fragmentor</b>       | 125 V                    |
| <b>Skimmer</b>          | 65 V                     |
| <b>Scan Range</b>       | 100-1,100 m/z            |
| <b>Ref Mass</b>         | Yes, 112.9856, 1033.9881 |
|                         |                          |
| <b>MS/MS</b>            | Auto with Preferred ions |
| <b>Collision energy</b> | 40 V                     |
| <b>Isolation width</b>  | 4 amu (medium)           |
| <b>Scan range</b>       | 70-1,700 m/z             |
| <b>Scan rate</b>        | 1 spectrum/sec           |



**Table S4. MS-DIAL v4.60 Parameters**

| <b>Centroid Parameters</b>                                                        |                                |
|-----------------------------------------------------------------------------------|--------------------------------|
| MS1 tolerance                                                                     | 0.02                           |
| MS2 tolerance                                                                     | 0.025                          |
| <b>Isotope Recognition</b>                                                        |                                |
| Maximum charged number                                                            | 2                              |
| <b>Peak Detection Parameters</b>                                                  |                                |
| Smoothing                                                                         | Linear weighted moving average |
| Level                                                                             | 3                              |
| Minimum peak width                                                                | 5                              |
| Minimum peak height                                                               | 5000                           |
| <b>Peak Spotting Parameters</b>                                                   |                                |
| Mass slice width                                                                  | 0.1                            |
| <b>MSP and MS/MS Identification Settings</b>                                      |                                |
| MSP file                                                                          | FluoroMatch 2.0 Library        |
| Accurate mass tolerance (MS1)                                                     | 0.02                           |
| Accurate mass tolerance (MS2)                                                     | 0.05                           |
| Identification score cut-off                                                      | 80                             |
| <b>Text File and Post Identification (Retention Time and Accurate Mass Based)</b> |                                |
| Text file                                                                         | In-house database              |
| Retention time tolerance                                                          | 0.1                            |
| Accurate mass tolerance                                                           | 0.02                           |
| Identification score cut-off                                                      | 85                             |
| <b>Adducts</b>                                                                    |                                |
| [M-H] <sup>-</sup>                                                                | Yes                            |
| [M+Hac-H] <sup>-</sup>                                                            | Yes                            |
| <b>Alignment Parameters</b>                                                       |                                |
| Reference file                                                                    | Pooled sample                  |
| Retention time tolerance                                                          | 0.1                            |
| MS1 tolerance                                                                     | 0.025                          |
| Retention time factor                                                             | 0.5                            |
| MS1 factor                                                                        | 0.5                            |
| Peak count filter                                                                 | 0                              |
| N% detected in at least 1 group                                                   | 0                              |
| Remove feature based on peak height fold-change                                   | TRUE                           |
| Sample max / blank average                                                        | 5                              |
| Sample average / blank average                                                    | 5                              |
| Keep identified and annotated metabolites                                         | TRUE                           |
| Keep removable features and assign tag for checking                               | TRUE                           |
| Gap filling by compulsion                                                         | TRUE                           |

**Table S5.** Mass labelled standards detected by HPLC-QTOF and number of detections per 93 samples

| Compound       | Structure                                                                           | Formula                                                                          | RT (min) | Ref <i>m/z</i> | <i>m/z</i> | Δppm  | Detects |
|----------------|-------------------------------------------------------------------------------------|----------------------------------------------------------------------------------|----------|----------------|------------|-------|---------|
| PFBA(a)        | 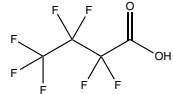   | C <sub>4</sub> HF <sub>7</sub> O <sub>2</sub>                                    | 5.99     | 212.9787       | 212.9799   | 3.52  | 91/93   |
| [M3]PFPeA      |    | [ <sup>13</sup> C] <sub>3</sub> C <sub>2</sub> HF <sub>9</sub> O <sub>2</sub>    | 9.62     | 265.9861       | 265.9865   | 1.50  | 90/93   |
| [M3]PFBS       |    | [ <sup>13</sup> C] <sub>3</sub> CHF <sub>9</sub> O <sub>3</sub> S                | 9.88     | 301.9531       | 301.9535   | 1.32  | 90/93   |
| [M2]PFHxA      |    | [ <sup>13</sup> C] <sub>2</sub> C <sub>4</sub> HF <sub>11</sub> O <sub>2</sub>   | 11.11    | 314.9795       | 314.9793   | -0.57 | 90/93   |
| [M4]PFHpA      |    | [ <sup>13</sup> C] <sub>4</sub> C <sub>3</sub> HF <sub>13</sub> O <sub>2</sub>   | 12.59    | 366.9830       | 366.9835   | 1.42  | 90/93   |
| [M]PFHxS       |   | C <sub>6</sub> HF <sub>13</sub> O[ <sup>18</sup> O] <sub>2</sub> S               | 12.60    | 402.9500       | 402.9458   | 10.52 | 88/93   |
| [M4]PFOA       |  | [ <sup>13</sup> C] <sub>4</sub> C <sub>4</sub> HF <sub>15</sub> O <sub>2</sub>   | 14.00    | 416.9788       | 416.9803   | 3.57  | 89/93   |
| [M4]PFOS       |  | [ <sup>13</sup> C] <sub>4</sub> C <sub>4</sub> HF <sub>17</sub> O <sub>3</sub> S | 15.27    | 502.9436       | 502.9442   | -1.15 | 90/93   |
| [M5]PFNA       |  | [ <sup>13</sup> C] <sub>5</sub> C <sub>4</sub> HF <sub>17</sub> O <sub>2</sub>   | 15.33    | 467.9800       | 467.9808   | 1.75  | 90/93   |
| [M]PFDA        |  | [ <sup>13</sup> C] <sub>2</sub> C <sub>8</sub> HF <sub>19</sub> O <sub>2</sub>   | 16.58    | 514.9667       | 514.9679   | 2.39  | 91/93   |
| [M3]HFPO-DA(b) |  | [ <sup>13</sup> C] <sub>3</sub> C <sub>3</sub> HF <sub>11</sub> O <sub>3</sub>   | 11.55    | 284.9773       | -          | -     | -       |

(a) The mass labeled MPFBA surrogate in samples was below the limit-of-detection of the instrument.

(b) [M3]HFPO-DA has the same *m/z* ion as the unlabeled analyte and cannot be isolated.

**Table S6.** SPE Recoveries

| PFAS  | Average % Recovery <sup>(a)</sup><br>( <i>n</i> = 5) | Standard Error |
|-------|------------------------------------------------------|----------------|
| PFBA  | 94.4                                                 | 11.2           |
| PFPeA | 86.8                                                 | 6.1            |
| PFHxA | 106.4                                                | 4.7            |
| PFHpA | 87.6                                                 | 2.8            |
| PFOA  | 94.3                                                 | 2.9            |
| PFNA  | 93.7                                                 | 6.1            |
| PFDA  | 114.9                                                | 8.5            |
| PFBS  | 100.1                                                | 8.1            |
| PFHxS | 89.2                                                 | 5.2            |
| PFOS  | 77.0                                                 | 6.7            |

<sup>(a)</sup> Data were measured by Pike et al.<sup>1</sup> with liquid chromatography triple quadrupole mass spectrometry.

**Table S7.** PFAS Concentrations in Blanks from Pike et al. (2021)

| PFAS    | Mean Concentration in Blanks (ng L <sup>-1</sup> ) <sup>(a)</sup> |            |               |            |            |             |               |              |
|---------|-------------------------------------------------------------------|------------|---------------|------------|------------|-------------|---------------|--------------|
|         | Method Blanks                                                     | Ride-Along | Willoughby OH | Wooster OH | Ashland OH | Rockford OH | Whitestown IN | Jackson Hole |
| TFA     | 0.7                                                               | 2          | 10            | 0.9        | 10         | 40          | 20            | 20           |
| PFBA    | 0.2                                                               | 0.2        | 2             | 0.1        | 2          | 5           | 30            | 0.9          |
| PFPeA   | 0.05                                                              | <0.03      | 0.6           | 0.003      | 0.9        | 1           | 6             | 0.5          |
| PFHxA   | 0.09                                                              | 0.07       | 2             | 0.07       | 2          | 3           | 7             | 0.2          |
| PFHpA   | 0.1                                                               | 0.07       | 1             | 0.1        | 0.5        | 0.8         | 2             | 0.2          |
| PFOA    | 0.1                                                               | 0.1        | 2             | 1          | 1          | 1           | 2             | 0.5          |
| PFNA    | 0.08                                                              | 0.1        | 3             | 0.08       | 2          | 1           | 2             | 0.1          |
| PFDA    | 0.1                                                               | 0.08       | 5             | 0.1        | 1          | 1           | 1             | 0.2          |
| PFOS    | 1                                                                 | 0.8        | 10            | 10         | 7          | 10          | 30            | 0.7          |
| HFPO-DA | 0.03                                                              | 0.04       | 0.05          | 0.02       | 0.2        | 0.09        | 1             | 0.0004       |

<sup>(a)</sup> Data were measured by Pike et al.<sup>1</sup> with liquid chromatography triple quadrupole mass spectrometry.

**Table S8.** Retention time and peak area variance of PFAS standards (linear isomers,  $n = 5$ )

| Analyte                                             | CAS #       | Retention Time (min) | % RSD Peak Area |
|-----------------------------------------------------|-------------|----------------------|-----------------|
| <b><i>Carboxylates</i></b>                          |             |                      |                 |
| Perfluoropropionic acid (PFPrA)                     | 422-64-0    | 3.62 ± 0.05          | -               |
| Perfluorobutanoic acid (PFBA)*                      | 375-22-4    | 6.05 ± 0.05          | 17.3            |
| Perfluoropentanoic acid (PFPeA)*                    | 2706-90-3   | 9.64 ± 0.02          | 13.0            |
| Perfluorohexanoic acid (PFHxA)*                     | 307-24-4    | 11.21 ± 0.03         | 10.6            |
| Perfluoroheptanoic acid (PFHpA)*                    | 375-85-9    | 12.64 ± 0.05         | 4.8             |
| Perfluorooctanoic acid (PFOA)*                      | 335-67-1    | 14.06 ± 0.07         | 6.7             |
| Perfluorononanoic acid (PFNA)*                      | 375-95-1    | 15.42 ± 0.07         | 6.7             |
| Perfluorodecanoic acid (PFDA)*                      | 335-76-2    | 16.67 ± 0.08         | 5.4             |
| Perfluoroundecanoic acid (PFUdA)                    | 2058-94-8   | 17.85 ± 0.08         | 5.6             |
| Perfluorododecanoic acid (PFDoA)                    | 307-55-1    | 18.97 ± 0.08         | 5.7             |
| <b><i>Sulfonates</i></b>                            |             |                      |                 |
| Perfluorobutanesulfonic acid (PFBS)*                | 375-73-5    | 9.86 ± 0.05          | 10.4            |
| Perfluorohexanesulfonic acid (PFHxS)*               | 355-46-4    | 12.65 ± 0.05         | 6.2             |
| Perfluorooctanesulfonic acid (PFOS)*                | 1763-23-1   | 15.34 ± 0.05         | 6.4             |
| <b><i>Telomer acids</i></b>                         |             |                      |                 |
| 2-Perfluorohexyl ethanoic acid (6:2 FTCA)           | 53826-12-3  | 13.71 ± 0.07         | -               |
| 2-Perfluorooctyl ethanoic acid (8:2 FTCA)           | 27854-31-5  | 16.00 ± 0.01         | -               |
| 2-Perfluorohdecyl ethanoic acid (10:2 FTCA)         | 53826-13-4  | 18.48 ± 0.01         | -               |
| <b><i>Telomer sulfonates</i></b>                    |             |                      |                 |
| 1H,1H,2H,2H-perfluorohexane sulfonic acid (4:2 FTS) | 757124-72-4 | 11.05 ± 0.05         | 23.7            |
| 1H,1H,2H,2H-perfluorooctane sulfonic acid (6:2 FTS) | 27619-97-2  | 13.94 ± 0.07         | 10.2            |
| 1H,1H,2H,2H-perfluorodecane sulfonic acid (8:2 FTS) | 39108-34-4  | 16.57 ± 0.07         | 3.7             |
| <b><i>Other</i></b>                                 |             |                      |                 |
| Hexafluoropropylene oxide dimer acid (HPFO-DA)*     | 13252-13-6  | 11.58 ± 0.07         | -               |
| Perfluorooctanesulfonamide (FOSA)                   | 754-91-6    | 17.36 ± 0.07         | 5.5             |

\*Isotopically labelled surrogate added to sample prior to extraction

**Table S9.** Retention time and peak area variance of PFAS standards in the pooled sample and calibration standard

| <b>Surrogate</b>        | <b>Retention Time (min)</b> | <b>% RSD Peak Area<sup>(a)</sup></b> |
|-------------------------|-----------------------------|--------------------------------------|
| MPFBA <sup>(b)</sup>    | 6.01 ± 0.02                 | 9.9                                  |
| [M3]PFPeA               | 9.63 ± 0.02                 | 9.6                                  |
| [M2]PFHxA               | 11.16 ± 0.04                | 11.5                                 |
| [M4]PFHpA               | 12.58 ± 0.05                | 8.5                                  |
| [M4]PFOA                | 13.99 ± 0.03                | 10.2                                 |
| [M5]PFNA                | 15.31 ± 0.07                | 7.4                                  |
| [M]PFDA                 | 16.55 ± 0.07                | 7.3                                  |
| [M]PFUdA <sup>(b)</sup> | 17.72 ± 0.07                | 5.8                                  |
| [M]PFDoA <sup>(b)</sup> | 18.81 ± 0.08                | 4.1                                  |
| [M3]PFBS                | 9.88 ± 0.03                 | 26                                   |
| [M]PFHxS                | 12.58 ± 0.05                | 6.7                                  |
| [M4]PFOS                | 15.24 ± 0.07                | 5.1                                  |
| [M3]HFPO-DA             | 11.56 ± 0.03                | -                                    |

<sup>(a)</sup> standard deviation ( $n = 4$ )

<sup>(b)</sup> measured using calibration standard

**Table S10.** Additional emerging PFAS identified in precipitation by QTOF MS/MS

| Ret Time (min) | Mass     | Formula                                                                                      | Ion                  | Identity                                                     | Level |
|----------------|----------|----------------------------------------------------------------------------------------------|----------------------|--------------------------------------------------------------|-------|
| 3.11           | 371.9851 | C <sub>8</sub> H <sub>3</sub> F <sub>11</sub> O <sub>4</sub>                                 | [M-H] <sup>-</sup>   | H-substituted perfluoroalkyl dioic acid                      | 5a    |
| 4.00           | 195.9963 | C <sub>4</sub> H <sub>2</sub> F <sub>6</sub> O <sub>2</sub>                                  | [M-H] <sup>-</sup>   | 2,3,3,4,4,4-hexafluorobutanoic acid                          | 3c    |
| 7.36           | 291.9802 | C <sub>6</sub> HF <sub>9</sub> O <sub>3</sub>                                                | [M-H] <sup>-</sup>   | unsaturated perfluorocarboxylic acid ether                   | 3c    |
| 7.77           | 245.9927 | C <sub>5</sub> H <sub>6</sub> F <sub>8</sub> O <sub>2</sub>                                  | [M-H] <sup>-</sup>   | H-substituted perfluoroalkyl acid                            | 5a    |
| 7.95           | 287.9844 | C <sub>7</sub> HF <sub>9</sub> O <sub>2</sub>                                                | [M-H] <sup>-</sup>   | unsaturated perfluorocarboxylic acid                         | 5a    |
| 9.56           | 527.9690 | C <sub>10</sub> H <sub>5</sub> F <sub>17</sub> O <sub>3</sub> S                              | [M-H] <sup>-</sup>   |                                                              | 5a    |
| 9.57           | 263.9849 | C <sub>5</sub> HF <sub>9</sub> O <sub>2</sub>                                                | [M-H] <sup>-</sup>   | branched perfluorocarboxylic acid                            | 3c    |
| 9.66           | 437.9947 | C <sub>10</sub> H <sub>4</sub> F <sub>14</sub> O <sub>3</sub>                                | [M-H] <sup>-</sup>   |                                                              | 4     |
| 9.78           | 238.0041 | C <sub>6</sub> H <sub>4</sub> F <sub>6</sub> O <sub>3</sub>                                  | [M-H] <sup>-</sup>   |                                                              | 4     |
| 10.23          | 603.0474 | C <sub>15</sub> H <sub>18</sub> F <sub>13</sub> NO <sub>5</sub> S <sub>2</sub>               | [M-H] <sup>-</sup>   | fluorotelomer sulfinyl amido sulfonic acid                   | 3c    |
| 10.35          | 257.9919 | C <sub>6</sub> H <sub>2</sub> F <sub>8</sub> O <sub>2</sub>                                  | [M-H] <sup>-</sup>   | H-substituted perfluorocarboxylic acid                       | 5a    |
| 10.42          | 295.9903 | C <sub>6</sub> H <sub>2</sub> F <sub>10</sub> O <sub>2</sub>                                 | [M-H] <sup>-</sup>   | H-substituted perfluorocarboxylic acid                       | 3c    |
| 10.99          | 287.9990 | C <sub>7</sub> H <sub>4</sub> F <sub>8</sub> O <sub>3</sub>                                  | [M-H] <sup>-</sup>   | H-substituted perfluorocarboxylic acid                       | 3c    |
| 11.12          | 313.9825 | C <sub>6</sub> HF <sub>11</sub> O <sub>2</sub>                                               | [M-H] <sup>-</sup>   | 2,2,3,4,4,5,5,5-octafluoro-3-(trifluoromethyl)pentanoic acid | 3c    |
| 11.32          | 307.9906 | C <sub>7</sub> H <sub>2</sub> F <sub>10</sub> O <sub>2</sub>                                 | [M-H] <sup>-</sup>   | H-substituted perfluorocarboxylic acid                       | 3c    |
| 11.68          | 504.0219 | C <sub>10</sub> H <sub>19</sub> F <sub>6</sub> N <sub>2</sub> O <sub>8</sub> PS <sub>2</sub> | [M-H] <sup>-</sup>   |                                                              | 4     |
| 11.93          | 972.1595 | C <sub>12</sub> H <sub>21</sub> F <sub>7</sub> N <sub>2</sub> O <sub>6</sub> S <sub>2</sub>  | [M-2H] <sup>2-</sup> | perfluoroalkyl sulfonamide + amine                           | 5a    |
| 12.54          | 753.9617 | C <sub>18</sub> H <sub>5</sub> F <sub>23</sub> O <sub>4</sub> S                              | [M-H] <sup>-</sup>   |                                                              | 4     |
| 13.47          | 449.9410 | C <sub>7</sub> HF <sub>15</sub> O <sub>3</sub> S                                             | [M-H] <sup>-</sup>   | branched perfluoroalkyl sulfonic acid                        | 5a    |
| 13.80          | 438.0087 | C <sub>10</sub> H <sub>7</sub> F <sub>13</sub> O <sub>2</sub> S                              | [M-H] <sup>-</sup>   | 6:2:1 Fluorotelomer thioether acetic acid                    | 5a    |
| 14.19          | 407.9823 | C <sub>9</sub> H <sub>2</sub> F <sub>14</sub> O <sub>2</sub>                                 | [M-H] <sup>-</sup>   | H-substituted perfluorocarboxylic acid                       | 5a    |
| 15.19          | 581.9426 | C <sub>10</sub> H <sub>2</sub> F <sub>20</sub> O <sub>3</sub> S                              | [M-H] <sup>-</sup>   | H-substituted perfluoroalkyl sulfonic acid                   | 3c    |
| 16.73          | 595.9703 | C <sub>12</sub> H <sub>2</sub> F <sub>22</sub> O <sub>2</sub>                                | [M-H] <sup>-</sup>   | H-substituted perfluorocarboxylic acid                       | 3c    |

**Table S11.** Minimum, maximum, and median PFAS concentrations (ng L<sup>-1</sup>) at each collection site

| Compound | Ashland                            | Jackson Hole       | Rockford                            | Shaker Heights        | Whitestown            | Willoughby             | Wooster                                  |
|----------|------------------------------------|--------------------|-------------------------------------|-----------------------|-----------------------|------------------------|------------------------------------------|
| 1        | 0.27 – 3.9<br>(1.1) <sup>(a)</sup> | (b)                | 0.36 – 1.4<br>(0.60)                | 0.23 – 4.9<br>(1.3)   | 0.29 – 1.4<br>(0.93)  | 0.002 – 0.80<br>(0.53) | 3.0 – 145<br>(12)                        |
| 2        | 0.28 – 4.5<br>(1.8)                |                    | 0.44 – 1.7<br>(1.1)                 | 0.32 – 9.4<br>(2.7)   | 0.54 – 2.1<br>(1.4)   | 0.002 – 1.7<br>(1.1)   | 14 – 597<br>(61)                         |
| 3        | 0.06 – 1.4<br>(0.32)               | 2.1 – 7.0<br>(5.4) | 0.04 – 0.61<br>(0.17)               | 0.02 – 1.1<br>(0.09)  | 0.02 – 0.39<br>(0.18) | 0.005 – 0.12<br>(0.06) | 27 – 1.25 × 10 <sup>3</sup><br>(163)     |
| 4        |                                    |                    | n.d. <sup>(c)</sup> – 2.1<br>(0.40) | 0.009 – 3.4<br>(0.67) | 0.001 – 1.1<br>(0.85) | n.d. – 4.3<br>(0.43)   | n.d. – 53<br>(6.7)                       |
| 5        | 0.02 – 0.57<br>(0.19)              |                    | 0.02 – 0.51<br>(0.09)               |                       | 0.02 – 0.42<br>(0.23) | 0.04 – 0.17<br>(0.07)  | 0.02 – 0.64<br>(0.27)                    |
| 6        |                                    |                    |                                     |                       |                       |                        | 11 – 139<br>(41)                         |
| 7        |                                    |                    |                                     | n.d. – 0.01<br>(n.d.) |                       |                        | 0.78 – 17<br>(5.4)                       |
| 8        | n.d. – 0.23<br>(0.15)              |                    |                                     | 0.003 – 1.6<br>(0.13) |                       |                        | 14 – 172<br>(66)                         |
| 9        | 0.004 – 0.16<br>(0.04)             |                    | n.d. – 0.08<br>(0.02)               | n.d. – 0.41<br>(0.01) |                       |                        | 5.1 – 147<br>(35)                        |
| 10       |                                    |                    |                                     |                       |                       |                        | 19 – 246<br>(92)                         |
| 11       | n.d. – 3.3<br>(1.3)                |                    | 0.81 – 4.1<br>(2.0)                 |                       | 0.30 – 2.0<br>(1.5)   | n.d. – 1.4<br>(0.99)   | 294 –<br>1.15 × 10 <sup>3</sup><br>(452) |
| 12       |                                    |                    |                                     |                       |                       |                        | 15 – 180.<br>(63)                        |
| 13       |                                    |                    | 0.90 – 2.4<br>(1.7)                 |                       |                       |                        | 240 –<br>2.71 × 10 <sup>3</sup><br>(922) |
| 14       | 0.83 – 6.5<br>(5.5)                |                    | 0.53 – 4.3<br>(0.93)                | 0.32 – 11<br>(3.0)    |                       | 0.67 – 4.0<br>(1.3)    | 129 – 636<br>(218)                       |
| 15       | n.d. – 0.59<br>(0.20)              |                    | n.d. – 1.3<br>(0.48)                | n.d. – 2.4<br>(0.28)  |                       | n.d. – 0.78<br>(0.06)  | 17 – 72<br>(31)                          |
| 16       | 0.25 – 2.13<br>(0.47)              |                    |                                     | 0.78 – 5.3<br>(2.1)   |                       |                        | 0.24 – 7.3<br>(4.8)                      |

| Compound                                               | Ashland                          | Jackson Hole          | Rockford              | Shaker Heights                   | Whitestown           | Willoughby           | Wooster                                                              |
|--------------------------------------------------------|----------------------------------|-----------------------|-----------------------|----------------------------------|----------------------|----------------------|----------------------------------------------------------------------|
| 17                                                     |                                  |                       | 0.03 – 0.43<br>(0.05) | 0.02 – 0.77<br>(0.19)            |                      |                      | 149 –<br>$2.01 \times 10^3$<br>(687)                                 |
| 18                                                     | 0.96 – 3.0<br>(2.1)              |                       | 0.57 – 4.8<br>(1.2)   | 0.37 – 11<br>(2.9)               | 0.16 – 3.6<br>(1.6)  | 0.10 – 1.8<br>(0.96) | $86 – 1.77 \times 10^3$<br>(414)                                     |
| 19                                                     |                                  |                       | 0.03 – 0.39<br>(0.12) | 0.01 – 0.41<br>(0.08)            |                      |                      | $87 – 1.57 \times 10^3$<br>(459)                                     |
| 20                                                     | 0.47 – 2.0<br>(0.68)             | 0.10 – 0.30<br>(0.21) |                       | 0.20 – 7.3<br>(1.6)              | 0.12 – 2.0<br>(1.3)  | 0.21 – 2.5<br>(1.3)  | 28 – 592<br>(139)                                                    |
| 21                                                     | 0.07 – 0.40<br>(0.13)            |                       |                       | 0.02 – 1.2<br>(0.11)             |                      |                      | 34 – 889<br>(218)                                                    |
| 23                                                     | 0.04 – 0.64<br>(0.14)            |                       |                       | 0.05 – 2.7<br>(0.57)             |                      |                      | 14 – 475<br>(88)                                                     |
| $\Sigma$ FTCAs <sup>(d)</sup>                          | 2.1 – 6.5<br>(3.9)               | 2.2 – 7.1<br>(5.5)    | 2.4 – 8.7<br>(5.0)    | 0.60 – 9.7<br>(3.1)              | 1.2 – 3.8<br>(2.4)   | 0.04 – 2.3<br>(1.3)  | 982 –<br>$1.02 \times 10^4$<br>( $3.07 \times 10^3$ )                |
| $\Sigma$ FTUCAs                                        | n.d. – 0.59<br>(0.20)            |                       | n.d. – 3.4<br>(0.58)  | 0.01 – 3.7<br>(1.4)              | n.d. – 1.1<br>(0.85) | n.d. – 4.3<br>(0.49) | 21 – 89<br>(47)                                                      |
| $\Sigma$ H-PFCAs                                       | 3.4 – 11<br>(7.8)                | 0.10 – 0.30<br>(0.21) | 1.5 – 5.8<br>(3.1)    | 1.4 – 22<br>(7.3)                | 0.27 – 5.0<br>(2.9)  | 0.15 – 6.8<br>(3.5)  | 288 –<br>$3.09 \times 10^3$<br>(782)                                 |
| $\Sigma$ H-PFdiCAs                                     | n.d. – 0.23<br>(0.15)            |                       |                       | n.d. – 1.6<br>(0.13)             |                      |                      | 25 – 311<br>(108)                                                    |
| $\Sigma$ PFCAs                                         | $63 – 1.14 \times 10^3$<br>(219) | 272 – 874<br>(313)    | 79 – 760.<br>(121)    | $51 – 1.21 \times 10^3$<br>(339) | 6.0 – 179<br>(77)    | 73 – 176<br>(96)     | 151 –<br>$2.29 \times 10^3$<br>(448)                                 |
| $\Sigma$ PFECAs <sup>+</sup>                           | 0.28 – 1.6<br>(0.98)             | 0.42 – 2.7<br>(5.2)   | n.d – 2.7<br>(0.85)   | 0.16 – 5.1<br>(1.3)              | 0.23 – 3.1<br>(1.5)  | 0.24 – 2.9<br>(0.56) | 20. – 263<br>(97)                                                    |
| $\Sigma$ PFSA <sub>s</sub>                             | 1.1 – 12<br>(2.3)                | 0.44 – 48<br>(5.2)    | 0.25 – 9.6<br>(0.77)  | 3.1 – 13<br>(6.6)                | 0.47 – 3.5<br>(0.78) | 4.4 – 11<br>(8.5)    | 1.4 – 19<br>(15)                                                     |
| <b><math>\Sigma</math> EPA-Monitored<sup>(e)</sup></b> | 4.1 – 24<br>(7.7)                | 4.7 – 78<br>(35)      | 2.8 – 17<br>(5.9)     | 4.6 – 48<br>(18)                 | 1.1 – 12<br>(7.4)    | 7.4 – 31<br>(13)     | 41 – 608<br>(115)                                                    |
| <b><math>\Sigma</math> Emerging</b>                    | $68 – 1.13 \times 10^3$<br>(231) | 270. – 854<br>(292)   | 85 – 759<br>(130.)    | $51 – 1.23 \times 10^3$<br>(343) | 7.6 – 181<br>(82)    | 76 – 176<br>(94)     | $1.47 \times 10^3 –$<br>$1.58 \times 10^4$<br>( $4.38 \times 10^3$ ) |



| Compound      | Ashland                          | Jackson Hole       | Rockford          | Shaker Heights                   | Whitestown        | Willoughby        | Wooster                                                              |
|---------------|----------------------------------|--------------------|-------------------|----------------------------------|-------------------|-------------------|----------------------------------------------------------------------|
| $\Sigma$ PFAS | 72 – $1.16 \times 10^3$<br>(239) | 275 – 932<br>(327) | 88 – 776<br>(135) | 57 – $1.26 \times 10^3$<br>(358) | 8.7 – 192<br>(89) | 83 – 191<br>(113) | $1.52 \times 10^3$ –<br>$1.64 \times 10^4$<br>( $4.45 \times 10^3$ ) |

<sup>(a)</sup> The value in parentheses is the median.

<sup>(b)</sup> No values are reported in the empty cells for the compounds at a particular site where the sample concentration was not significantly different from the method blank according to a one-tailed *t*-test ( $p < 0.05$ ). Compounds 22 and 24 from Table 1 were not quantified at any site because of high presence in blanks.

<sup>(c)</sup> n.d. = non-detect

<sup>(d)</sup> The class sums include eight FTCAs, two FTUCAs, four H-PFCAs, two H-PFdiCAs, nine PFCAs, three PFSAs, and three PFECAs+ (one PFECA, one unsaturated PFECA, and one H-substituted unsaturated PFECA).

<sup>(e)</sup> The EPA-monitored group includes ten PFAS: PFHpS (from this work) and the C4-C10 PFCAs, PFOS, and HFPO-DA (from Pike et al.<sup>1</sup>). Each of these compounds appears in EPA Method 533 and/or 537.1.<sup>2,3</sup> We refer to the remaining 22 PFAS, which are not found in the EPA drinking water methods, as emerging PFAS. The emerging group includes compounds **1-15**, **17-21**, and **23** from **Table 1** of this work, along with TFA (trifluoroacetic acid) from Pike et al.<sup>1</sup>

**Table S12.** Minimum, maximum, and median deposition fluxes (ng m<sup>-2</sup>) at each collection site

| Compound | Ashland             | Jackson Hole     | Rockford            | Shaker Heights        | Whitestown          | Willoughby          | Wooster                                                                      |
|----------|---------------------|------------------|---------------------|-----------------------|---------------------|---------------------|------------------------------------------------------------------------------|
| 1        | 5.3 – 75<br>(28)    |                  | 0.9 – 16<br>(7.2)   | 4.2 – 180.<br>(8.7)   | 1.2 – 24<br>(1.4)   | 0.03 – 24<br>(5.5)  | 28 – 6.0 × 10 <sup>3</sup><br>(88)                                           |
| 2        | 7.0 – 84<br>(32)    |                  | 1.1 – 23<br>(9.1)   | 6.8 – 345<br>(14)     | 1.4 – 36<br>(2.3)   | 0.04 – 53<br>(8.9)  | 143 – 2.5 × 10 <sup>4</sup><br>(431)                                         |
| 3        | 0.5 – 35<br>(2.8)   | 14 – 78<br>(40.) | 0.1 – 7.3<br>(1.6)  | 0.33 – 42<br>(1.2)    | 0.09 – 6.8<br>(0.5) | 0.1 – 2.4<br>(0.8)  | 256 – 5.2 × 10 <sup>4</sup><br>(1.2 × 10 <sup>3</sup> )                      |
| 4        |                     |                  | n.d. – 23<br>(4.2)  | 0.07 – 34<br>(11)     | n.d. – 24<br>(3.7)  | n.d. – 122<br>(4.6) | n.d. – 297<br>(105)                                                          |
| 5        | 0.2 – 7.8<br>(3.8)  |                  | 0.12 – 5.5<br>(0.9) |                       | 0.03 – 4.9<br>(0.9) | 0.2 – 5.9<br>(1.1)  | 0.09 – 15<br>(1.8)                                                           |
| 6        |                     |                  |                     |                       |                     |                     | 42 – 5.7 × 10 <sup>3</sup><br>(372)                                          |
| 7        |                     |                  |                     | n.d. – 0.29<br>(0.02) |                     |                     | 7.3 – 681<br>(51)                                                            |
| 8        | n.d. – 6.8<br>(1.1) |                  |                     | 0.07 – 12<br>(1.7)    |                     |                     | 52 – 7.1 × 10 <sup>3</sup><br>(466)                                          |
| 9        | 0.03 – 4.1<br>(1.1) |                  | n.d. – 1.0<br>(0.1) | n.d. – 15<br>(0.03)   |                     |                     | 20. – 6.1 × 10 <sup>3</sup><br>(356)                                         |
| 10       |                     |                  |                     |                       |                     |                     | 90. – 1.0 × 10 <sup>4</sup><br>(804)                                         |
| 11       | n.d. – 64<br>(39)   |                  | 2.7 – 44<br>(23)    |                       | 0.5 – 39<br>(3.9)   | n.d. – 30.<br>(7.8) | 1.2 × 10 <sup>3</sup> –<br>4.7 × 10 <sup>4</sup><br>(4.6 × 10 <sup>3</sup> ) |
| 12       |                     |                  |                     |                       |                     |                     | 141 – 4.0 × 10 <sup>3</sup><br>(471)                                         |
| 13       |                     |                  | 3.6 – 28<br>(16)    |                       |                     |                     | 916 – 1.1 × 10 <sup>5</sup><br>(9.1 × 10 <sup>3</sup> )                      |
| 14       | 7.0 – 219<br>(60.)  |                  | 1.9 – 52<br>(11)    | 4.3 – 394<br>(36)     |                     | 5.3 – 114<br>(17)   | 552 – 2.6 × 10 <sup>4</sup><br>(2.1 × 10 <sup>3</sup> )                      |
| 15       | n.d. – 12<br>(2.6)  |                  | n.d. – 16<br>(1.4)  | n.d. – 7.9<br>(3.0)   |                     | n.d. – 20.<br>(0.3) | 65 – 3.0 × 10 <sup>3</sup><br>(284)                                          |
| 16       | 2.1 – 43<br>(12)    |                  |                     | 8.9 – 194<br>(23)     |                     |                     | 0.9 - 144<br>(54)                                                            |
| 17       |                     |                  | 0.1 – 5.1<br>(0.6)  | 0.32 – 10.<br>(2.7)   |                     |                     | 569 – 8.3 × 10 <sup>4</sup><br>(5.5 × 10 <sup>3</sup> )                      |

| Compound                                 | Ashland                                                           | Jackson Hole                                     | Rockford                                         | Shaker Heights                                    | Whitestown                       | Willoughby                                       | Wooster                                                           |
|------------------------------------------|-------------------------------------------------------------------|--------------------------------------------------|--------------------------------------------------|---------------------------------------------------|----------------------------------|--------------------------------------------------|-------------------------------------------------------------------|
| 18                                       | 18 – 91<br>(21)                                                   |                                                  | 3.0 – 52<br>(13)                                 | 3.7 – 218<br>(26)                                 | 0.2 – 45<br>(4.7)                | 2.0 – 30.<br>(17)                                | $328 - 7.3 \times 10^4$<br>( $4.1 \times 10^3$ )                  |
| 19                                       |                                                                   |                                                  | 0.1 – 4.4<br>(0.7)                               | 0.17 – 3.8<br>(1.0)                               |                                  |                                                  | $330. - 6.5 \times 10^4$<br>( $4.4 \times 10^3$ )                 |
| 20                                       | 3.9 – 78<br>(14)                                                  | 0.8 – 2.3<br>(1.8)                               |                                                  | 4.3 – 95<br>(12)                                  | 0.2 – 35<br>(5.3)                | 7.5 – 36<br>(20.)                                | $106 - 2.4 \times 10^4$<br>( $1.3 \times 10^3$ )                  |
| 21                                       | 0.5 – 6.3<br>(2.6)                                                |                                                  |                                                  | 0.24 – 33<br>(1.4)                                |                                  |                                                  | $140. - 3.7 \times 10^4$<br>( $2.1 \times 10^3$ )                 |
| 23                                       | 0.7 – 8.1<br>(1.7)                                                |                                                  |                                                  | 1.1 – 89<br>(4.2)                                 |                                  |                                                  | $64 - 2.0 \times 10^4$<br>(838)                                   |
| $\Sigma$ FTCAs                           | 17 – 156<br>(59)                                                  | 14 – 79<br>(41)                                  | 7.8 – 104<br>(53)                                | 10. – 353<br>(24)                                 | 2.2 – 66<br>(5.3)                | 0.6 – 48<br>(14)                                 | $5.0 \times 10^3 -$<br>$4.2 \times 10^5$<br>( $2.8 \times 10^4$ ) |
| $\Sigma$ FTUCAs                          | n.d. – 12<br>(2.6)                                                |                                                  | 0.03 – 37<br>(5.3)                               | 0.24 – 34<br>(13)                                 | n.d. – 24<br>(3.7)               | n.d. – 122<br>(6.5)                              | $97 - 3.0 \times 10^3$<br>(404)                                   |
| $\Sigma$ H-PFCAs                         | 29 – 376<br>(116)                                                 | 0.8 – 2.3<br>(1.8)                               | 5.0 – 67<br>(32)                                 | 24 – 707<br>(80.)                                 | 0.4 – 80.<br>(9.9)               | 2.5 – 174<br>(48)                                | $1.5 \times 10^3 -$<br>$1.3 \times 10^5$<br>( $4.3 \times 10^4$ ) |
| $\Sigma$ H-PFdiCAs                       | n.d. – 6.8<br>(1.1)                                               |                                                  |                                                  | 0.07 – 12<br>(1.7)                                |                                  |                                                  | $94 - 1.3 \times 10^4$<br>(838)                                   |
| $\Sigma$ PFCAs                           | $1.4 \times 10^3 -$<br>$1.8 \times 10^4$<br>( $7.2 \times 10^3$ ) | $795 - 9.8 \times 10^3$<br>( $5.2 \times 10^3$ ) | $294 - 8.7 \times 10^3$<br>( $1.3 \times 10^3$ ) | $520. - 3.2 \times 10^4$<br>( $3.2 \times 10^3$ ) | $9.2 - 2.7 \times 10^3$<br>(253) | $393 - 3.9 \times 10^3$<br>( $1.8 \times 10^3$ ) | $1.2 \times 10^3 -$<br>$9.4 \times 10^4$<br>( $3.4 \times 10^3$ ) |
| $\Sigma$ PFECAs+                         | 1.9 – 63<br>(9.5)                                                 | 6.9 – 26<br>(8.0)                                | n.d. – 30.<br>(9.5)                              | 3.4 – 58<br>(13)                                  | 0.4 – 56<br>(4.1)                | 1.0 – 82<br>(9.2)                                | $139 - 1.1 \times 10^4$<br>(851)                                  |
| $\Sigma$ PFSAs                           | 8.8 – 238<br>(54)                                                 | 8.3 – 540.<br>(13)                               | 2.6 – 32<br>(5.5)                                | 21 – 464<br>(75)                                  | 0.7 – 76<br>(2.0)                | 36 – 305<br>(129)                                | 7.6 – 612<br>(142)                                                |
| <b><math>\Sigma</math> EPA-Monitored</b> | 40. – 488<br>(173)                                                | 89 – 874<br>(89)                                 | 17 – 196<br>(51)                                 | $59 - 1.8 \times 10^3$<br>(186)                   | 1.6 – 264<br>(14)                | 65 – 846<br>(193)                                | $317 - 2.5 \times 10^4$<br>(833)                                  |
| <b><math>\Sigma</math> Emerging</b>      | $1.5 \times 10^3 -$<br>$1.8 \times 10^4$<br>( $7.3 \times 10^3$ ) | $741 - 9.5 \times 10^3$<br>( $5.1 \times 10^3$ ) | $287 - 8.7 \times 10^3$<br>( $1.4 \times 10^3$ ) | $530. - 3.9 \times 10^4$<br>( $3.3 \times 10^3$ ) | $12 - 2.7 \times 10^3$<br>(261)  | $421 - 3.9 \times 10^3$<br>( $1.8 \times 10^3$ ) | $1.0 \times 10^4 -$<br>$6.5 \times 10^5$<br>( $4.2 \times 10^4$ ) |

| Compound      | Ashland                                                      | Jackson Hole                                      | Rockford                                         | Shaker Heights                                   | Whitestown                      | Willoughby                                       | Wooster                                                      |
|---------------|--------------------------------------------------------------|---------------------------------------------------|--------------------------------------------------|--------------------------------------------------|---------------------------------|--------------------------------------------------|--------------------------------------------------------------|
| $\Sigma$ PFAS | $1.6 \times 10^3 - 1.9 \times 10^4$<br>( $7.8 \times 10^3$ ) | 830. - $1.0 \times 10^4$<br>( $5.2 \times 10^3$ ) | $342 - 8.9 \times 10^3$<br>( $1.4 \times 10^3$ ) | $588 - 3.4 \times 10^4$<br>( $3.4 \times 10^3$ ) | $13 - 3.0 \times 10^3$<br>(275) | $498 - 4.2 \times 10^3$<br>( $1.9 \times 10^3$ ) | $1.1 \times 10^4 - 6.7 \times 10^5$<br>( $4.3 \times 10^4$ ) |

See footnotes for Table S11.

**Table S13.** Average and standard deviation of PFAS concentrations in blanks (ng L<sup>-1</sup>)

| <b>Compound</b> | <b>Method Blanks<sup>(a)</sup><br/>(<i>n</i> = 16)</b> | <b>Site Blanks<sup>(b)</sup><br/>(<i>n</i> = 7)</b> | <b>Field Blank<sup>(c)</sup><br/>(<i>n</i> = 1)</b> |
|-----------------|--------------------------------------------------------|-----------------------------------------------------|-----------------------------------------------------|
| 1               | 0.002 ± 0.002                                          | 0.064 ± 0.051                                       | 0.006                                               |
| 2               | 0.002 ± 0.001                                          | 0.20 ± 0.14                                         | 0.002                                               |
| 3               | 0.020 ± 0.013                                          | 0.29 ± 0.26                                         | 0.011                                               |
| 4               | 0.002 ± 0.001                                          | 0.069 ± 0.087                                       | 0.001                                               |
| 5               | 0.051 ± 0.066                                          | 0.047 ± 0.043                                       | n.d. <sup>(d)</sup>                                 |
| 6               | < 0.001                                                | 0.005 ± 0.014                                       | n.d.                                                |
| 7               | < 0.001                                                | 0.003 ± 0.004                                       | n.d.                                                |
| 8               | 0.008 ± 0.007                                          | 0.15 ± 0.22                                         | 0.008                                               |
| 9               | 0.001 ± 0.002                                          | 0.044 ± 0.037                                       | n.d.                                                |
| 10              | 0.001 ± 0.004                                          | 0.003 ± 0.007                                       | n.d.                                                |
| 11              | 0.178 ± 0.378                                          | 1.1 ± 1.0                                           | 0.88                                                |
| 12              | 0.050 ± 0.063                                          | 0.11 ± 0.16                                         | n.d.                                                |
| 13              | 0.35 ± 0.44                                            | 0.53 ± 0.64                                         | n.d.                                                |
| 14              | 0.22 ± 0.22                                            | 1.9 ± 1.3                                           | 1.0                                                 |
| 15              | 0.005 ± 0.010                                          | 0.4 ± 1.0                                           | n.d.                                                |
| 16              | 0.67 ± 1.68                                            | 4.4 ± 5.8                                           | 0.40                                                |
| 17              | 0.010 ± 0.010                                          | 0.021 ± 0.030                                       | 0.10                                                |
| 18              | 0.48 ± 1.25                                            | 1.6 ± 1.1                                           | n.d.                                                |
| 19              | 0.037 ± 0.052                                          | 0.39 ± 0.93                                         | 0.18                                                |
| 20              | 0.33 ± 0.34                                            | 1.2 ± 1.2                                           | 0.42                                                |
| 21              | 0.054 ± 0.067                                          | 0.098 ± 0.097                                       | 0.05                                                |
| 23              | 0.052 ± 0.069                                          | 0.24 ± 0.23                                         | 0.12                                                |

<sup>(a)</sup> Method blanks consisted of Nanopure water carried through the entire sample preparation procedure.

<sup>(b)</sup> Site blanks were prepared by filling the HDPE collection tub with 1 L of Nanopure water and leaving the water exposed to the atmosphere on a day without rain. Accordingly, the site blanks include contributions from dry deposition but not wet deposition. Here, site blanks are averaged from Ashland (*n* = 2), Rockford (*n* = 2), Whitestown (*n* = 2), and Willoughby (*n* = 1). Site blanks were not available from Jackson Hole, Shaker Heights, or Wooster, but site blanks for all locations have been previously analyzed in Pike et al.<sup>1</sup>

<sup>(c)</sup> The field blank was a ride-along bottle of Nanopure water from the Whitestown site.

<sup>(d)</sup> n.d. = non-detect

**Table S14.** Kruskal-Wallis test comparing EPA-monitored and emerging PFAS at each sampling site

| Sampling Site      | <i>p</i> -value*                              |
|--------------------|-----------------------------------------------|
| Shaker Heights, OH | <b><math>1.80 \times 10^{-5}</math></b>       |
| Jackson Hole, WY   | 0.333                                         |
| Wooster, OH        | <b><math>&lt; 2.20 \times 10^{-16}</math></b> |
| Rockford, OH       | 0.968                                         |
| Ashland, OH        | 0.350                                         |
| Whitestown, IN     | 0.104                                         |
| Willoughby, OH     | <b>0.020</b>                                  |

\**p*-values < 0.05 are statistically significant and bolded.

**Table S15.** Kruskal-Wallis test comparing chain lengths at each sampling site

| Sampling Site      | <i>p</i> -value*                        |
|--------------------|-----------------------------------------|
| Shaker Heights, OH | <b><math>4.00 \times 10^{-7}</math></b> |
| Jackson Hole, WY   | <b>0.018</b>                            |
| Wooster, OH        | <b><math>3.24 \times 10^{-9}</math></b> |
| Rockford, OH       | 0.088                                   |
| Ashland, OH        | <b>0.023</b>                            |
| Whitestown, IN     | 0.168                                   |
| Willoughby, OH     | <b>0.046</b>                            |

\**p*-values < 0.05 are statistically significant and bolded. Only statistically significant results were subjected to post-hoc analysis.

**Table S16.** Results (*p*-values) of Wilcoxon post-hoc test comparing chain lengths

| Sampling Location  | Ultra-Short/Short                         | Ultra-Short/Long                        | Short/Long                              |
|--------------------|-------------------------------------------|-----------------------------------------|-----------------------------------------|
| Shaker Heights, OH | <b><math>1.70 \times 10^{-6}</math> *</b> | <b><math>3.50 \times 10^{-7}</math></b> | 0.31                                    |
| Jackson Hole, WY   | <b>0.005</b>                              | <b>0.005</b>                            | 0.958                                   |
| Wooster, OH        | 0.100                                     | 0.130                                   | <b><math>1.10 \times 10^{-9}</math></b> |
| Ashland, OH        | 0.057                                     | <b>0.019</b>                            | 0.521                                   |
| Willoughby, OH     | 0.196                                     | 0.316                                   | 0.078                                   |

\**p*-values < 0.05 are statistically significant and bolded.

**Table S17.** Results of Kruskal-Wallis test comparing functional class at each sampling site

| <b>Sampling Site</b> | <b><i>p</i>-value*</b>                     |
|----------------------|--------------------------------------------|
| Shaker Heights, OH   | < <b><math>2.20 \times 10^{-16}</math></b> |
| Jackson Hole, WY     | 0.072                                      |
| Wooster, OH          | < <b><math>2.20 \times 10^{-16}</math></b> |
| Rockford, OH         | <b><math>3.17 \times 10^{-5}</math></b>    |
| Ashland, OH          | <b><math>1.24 \times 10^{-9}</math></b>    |
| Whitestown, IN       | 0.834                                      |
| Willoughby, OH       | 0.474                                      |

\**p*-values < 0.05 are statistically significant and bolded. Only statistically significant results were subjected to post-hoc analysis.

**Table S18.** Results (*p*-values) of Wilcoxon post-hoc test comparing functional classes at each sampling site

|                 | Shaker Heights,<br>OH         | Wooster,<br>OH                 | Rockford,<br>OH               | Ashland,<br>OH |
|-----------------|-------------------------------|--------------------------------|-------------------------------|----------------|
| FTCA/FTUCA      | 1.00                          | <b>9.50 x 10<sup>-6</sup></b>  | 1.00                          | 0.879          |
| FTCA/H-PFCA     | <b>3.70 x 10<sup>-7</sup></b> | 0.994                          | 0.233                         | <b>0.002</b>   |
| FTCA/H-PFdiCA   | 1.00                          | <b>0.013</b>                   | N/A                           | 0.298          |
| FTCA/oPFSA      | <b>0.028</b>                  | <b>0.048</b>                   | <b>0.001</b>                  | <b>0.043</b>   |
| FTCA/PFCA       | <b>2.90 x 10<sup>-8</sup></b> | <b>3.50 x 10<sup>-12</sup></b> | 1.00                          | <b>0.017</b>   |
| FTCA/PFECA+     | 1.00                          | <b>4.60 x 10<sup>-8</sup></b>  | 1.00                          | 1.00           |
| FTCA/PFSA       | <b>7.4 x 10<sup>-7</sup></b>  | <b>3.50 x 10<sup>-12</sup></b> | 1.00                          | 1.00           |
| FTUCA/H-PFCA    | <b>0.001</b>                  | <b>1.80 x 10<sup>-5</sup></b>  | 0.175                         | <b>0.010</b>   |
| FTUCA/H-PFdiCA  | 1.00                          | 0.083                          | N/A                           | 1.00           |
| FTUCA/oPFSA     | 0.141                         | 0.994                          | 0.493                         | 1.00           |
| FTUCA/PFCA      | <b>0.016</b>                  | 1.00                           | 0.700                         | <b>0.022</b>   |
| FTUCA/PFECA+    | 1.00                          | 0.994                          | 1.00                          | 0.530          |
| FTUCA/PFSA      | <b>0.0001</b>                 | 0.055                          | 1.00                          | 1.00           |
| H-PFCA/H-PFdiCA | <b>1.10 x 10<sup>-5</sup></b> | 0.058                          | N/A                           | <b>0.006</b>   |
| H-PFCA/oPFSA    | <b>0.0003</b>                 | 0.072                          | <b>5.70 x 10<sup>-5</sup></b> | <b>0.0001</b>  |
| H-PFCA/PFCA     | 0.651                         | <b>7.30 x 10<sup>-8</sup></b>  | 0.666                         | 0.879          |
| H-PFCA/PFECA+   | <b>0.003</b>                  | <b>6.30 x 10<sup>-7</sup></b>  | 1.00                          | 0.567          |
| H-PFCA/PFSA     | 1.00                          | <b>3.50 x 10<sup>-15</sup></b> | <b>0.029</b>                  | <b>0.006</b>   |
| H-PFdiCA/oPFSA  | 0.376                         | 1.00                           | N/A                           | 1.00           |
| H-PFdiCA/PFCA   | <b>0.001</b>                  | 0.076                          | N/A                           | <b>0.003</b>   |
| H-PFdiCA/PFECA+ | 1.00                          | <b>0.037</b>                   | N/A                           | 0.078          |
| H-PFdiCA/PFSA   | <b>1.90 x 10<sup>-5</sup></b> | <b>7.90 x 10<sup>-7</sup></b>  | N/A                           | 0.879          |
| oPFSA/PFCA      | <b>0.0002</b>                 | 0.994                          | <b>0.0001</b>                 | <b>0.001</b>   |
| oPFSA/PFECA+    | 1.00                          | 0.464                          | 0.493                         | <b>0.022</b>   |
| oPFSA/PFSA      | <b>0.001</b>                  | <b>0.002</b>                   | <b>0.013</b>                  | 0.503          |
| PFCA/PFECA+     | <b>0.015</b>                  | 0.640                          | 1.00                          | 1.00           |
| PFCA/PFSA       | 0.066                         | <b>0.0003</b>                  | 0.292                         | <b>0.020</b>   |
| PFECA+/PFSA     | <b>0.001</b>                  | 0.202                          | 1.00                          | 0.879          |

*p*-values < 0.05 are statistically significant and bolded. N/A indicates that the comparison could not be made due to functional class not being detected at that location.



**Table S19.** Results of Kruskal-Wallis test comparing sampling sites in terms of functional class

| <b>Functional Class</b> | <b><i>p</i>-value*</b>              |
|-------------------------|-------------------------------------|
| FTCA                    | <b>&lt; 2.20 x 10<sup>-16</sup></b> |
| FTUCA                   | <b>1.00 x 10<sup>-4</sup></b>       |
| H-PFCA                  | <b>&lt; 2.20 x 10<sup>-16</sup></b> |
| H-PFdiCA                | <b>1.44 x 10<sup>-6</sup></b>       |
| oPFSA                   | <b>5.57 x 10<sup>-5</sup></b>       |
| PFCA                    | <b>&lt; 2.20 x 10<sup>-16</sup></b> |
| PFECA+                  | <b>2.00 x 10<sup>-4</sup></b>       |
| PFSA                    | <b>1.00 x 10<sup>-3</sup></b>       |

\**p*-values < 0.05 are statistically significant and bolded. Only statistically significant results were subjected to post-hoc analysis.

**Table S20.** Results (*p*-values) of Wilcoxon post-hoc test comparing sampling sites in terms of functional classes

|                                 | FTCA                                | FTUCA        | H-PFCA                              | H-PFdiCA                      | oPFSA         | PFCA                                | PFECA+        | PFSA                          |
|---------------------------------|-------------------------------------|--------------|-------------------------------------|-------------------------------|---------------|-------------------------------------|---------------|-------------------------------|
| Shaker Heights/<br>Jackson Hole | 0.146                               | N/A          | <b>0.004</b>                        | <b>2.20 x 10<sup>-7</sup></b> | N/A           | 1.00                                | 1.00          | 1.00                          |
| Shaker Heights/<br>Wooster      | <b>&lt; 2.20 x 10<sup>-16</sup></b> | <b>0.001</b> | <b>&lt; 2.20 x 10<sup>-16</sup></b> | N/A                           | <b>0.0007</b> | <b>1.00 x 10<sup>-9</sup></b>       | <b>0.0002</b> | 1.00                          |
| Shaker Heights/<br>Rockford     | 1.00                                | 1.00         | 0.169                               | N/A                           | 0.824         | <b>0.0005</b>                       | 1.00          | <b>3.90 x 10<sup>-6</sup></b> |
| Shaker Heights/<br>Ashland      | 0.172                               | 1.00         | 0.860                               | 0.660                         | 0.610         | 1.00                                | 1.00          | 0.267                         |
| Shaker Heights/<br>Whitestown   | 1.00                                | 1.00         | 0.169                               | N/A                           | N/A           | <b>0.0005</b>                       | 1.00          | <b>0.002</b>                  |
| Shaker Heights/<br>Willoughby   | N/A                                 | N/A          | N/A                                 | N/A                           | N/A           | <b>0.002</b>                        | 1.00          | 1.00                          |
| Jackson Hole/<br>Wooster        | 0.067                               | N/A          | <b>0.002</b>                        | N/A                           | N/A           | <b>0.0003</b>                       | 1.00          | 1.00                          |
| Jackson Hole/<br>Rockford       | 0.098                               | N/A          | 0.058                               | N/A                           | N/A           | 0.058                               | 1.00          | 0.341                         |
| Jackson Hole/<br>Ashland        | 0.209                               | N/A          | <b>0.009</b>                        | N/A                           | N/A           | 1.00                                | 1.00          | 1.00                          |
| Jackson Hole/<br>Whitestown     | 0.146                               | N/A          | 0.860                               | N/A                           | N/A           | <b>0.029</b>                        | 1.00          | 0.636                         |
| Jackson Hole/<br>Willoughby     | N/A                                 | N/A          | N/A                                 | N/A                           | N/A           | 0.230                               | 1.00          | 1.00                          |
| Wooster/<br>Rockford            | <b>&lt; 2.20 x 10<sup>-16</sup></b> | <b>0.002</b> | <b>6.20 x 10<sup>-13</sup></b>      | N/A                           | <b>0.0003</b> | <b>1.20 x 10<sup>-14</sup></b>      | 0.078         | 0.094                         |
| Wooster/<br>Ashland             | <b>6.30 x 10<sup>-16</sup></b>      | <b>0.026</b> | <b>4.40 x 10<sup>-14</sup></b>      | <b>0.0002</b>                 | <b>0.0005</b> | <b>2.00 x 10<sup>-7</sup></b>       | 0.677         | 1.00                          |
| Wooster/<br>Whitestown          | <b>1.50 x 10<sup>-8</sup></b>       | <b>0.133</b> | <b>2.30 x 10<sup>-9</sup></b>       | N/A                           | N/A           | <b>5.20 x 10<sup>-12</sup></b>      | 0.449         | 0.192                         |
| Wooster/<br>Willoughby          | N/A                                 | N/A          | N/A                                 | N/A                           | N/A           | <b>&lt; 2.20 x 10<sup>-16</sup></b> | 0.237         | 1.00                          |
| Rockford/<br>Ashland            | 0.631                               | 1.00         | <b>0.050</b>                        | N/A                           | 0.216         | <b>6.50 x 10<sup>-5</sup></b>       | 1.00          | 0.163                         |
| Rockford/<br>Whitestown         | 1.00                                | 1.00         | 0.860                               | N/A                           | N/A           | 0.361                               | 1.00          | 1.00                          |
| Rockford/<br>Willoughby         | N/A                                 | N/A          | N/A                                 | N/A                           | N/A           | 1.00                                | 1.00          | 0.848                         |
| Ashland/<br>Whitestown          | 0.394                               | 1.00         | 0.103                               | N/A                           | N/A           | <b>0.0002</b>                       | 1.00          | 0.584                         |
| Ashland/<br>Willoughby          | N/A                                 | N/A          | N/A                                 | N/A                           | N/A           | <b>0.0003</b>                       | 1.00          | 1.00                          |
| Whitestown/<br>Willoughby       | N/A                                 | N/A          | N/A                                 | N/A                           | N/A           | 0.454                               | 1.00          | 0.728                         |

*p*-values < 0.05 are statistically significant and bolded. N/A indicates that the comparison could not be made due to functional class not being detected at that location.

**Table S21.** PFAS pairs with statistically significant ( $p < 0.05$ ) strong correlations ( $\tau > 0.80$ )

| <b>Compound Pair</b>    | <b>Correlation Coefficient (<math>\tau</math>)</b> |
|-------------------------|----------------------------------------------------|
| All Sites               |                                                    |
| Compound 1/Compound 2   | 0.86                                               |
| Compound 10/Compound 13 | 0.91                                               |
| Compound 11/Compound 13 | 0.83                                               |
| Shaker Heights, OH      |                                                    |
| Compound 1/TFA          | 0.87                                               |
| Compound 1/Compound 2   | 0.82                                               |
| Wooster, OH             |                                                    |
| Compound 1/Compound 2   | 0.91                                               |
| Compound 1/Compound 3   | 0.91                                               |
| Compound 1/Compound 12  | 0.87                                               |
| Compound 2/Compound 3   | 0.91                                               |
| Compound 2/Compound 12  | 0.87                                               |
| Compound 3/Compound 12  | 0.87                                               |
| Compound 3/PFPeA        | 0.87                                               |
| Compound 6/Compound 8   | 0.96                                               |
| Compound 6/Compound 9   | 0.96                                               |
| Compound 6/Compound 13  | 0.91                                               |
| Compound 6/Compound 14  | 0.82                                               |
| Compound 6/Compound 15  | 0.87                                               |
| Compound 6/Compound 17  | 0.91                                               |
| Compound 6/Compound 18  | 0.82                                               |
| Compound 6/Compound 19  | 0.87                                               |
| Compound 6/Compound 20  | 0.87                                               |
| Compound 6/Compound 21  | 0.81                                               |
| Compound 6/Compound 23  | 0.87                                               |
| Compound 7/Compound 12  | 0.82                                               |
| Compound 7/PFPeA        | 0.82                                               |
| Compound 8/Compound 9   | 0.91                                               |
| Compound 8/Compound 10  | 0.96                                               |
| Compound 8/Compound 13  | 0.87                                               |
| Compound 8/Compound 14  | 0.87                                               |
| Compound 8/Compound 15  | 0.91                                               |
| Compound 8/Compound 17  | 0.91                                               |
| Compound 8/Compound 19  | 0.82                                               |
| Compound 8/Compound 20  | 0.82                                               |
| Compound 8/Compound 21  | 0.82                                               |
| Compound 8/Compound 23  | 0.82                                               |
| Compound 9/Compound 10  | 0.96                                               |
| Compound 9/Compound 13  | 0.96                                               |
| Compound 9/Compound 15  | 0.82                                               |
| Compound 9/Compound 17  | 0.96                                               |

| <b>Compound Pair</b>    | <b>Correlation Coefficient (<math>\tau</math>)</b> |
|-------------------------|----------------------------------------------------|
| Compound 9/Compound 18  | 0.87                                               |
| Compound 9/Compound 19  | 0.91                                               |
| Compound 9/Compound 20  | 0.91                                               |
| Compound 9/Compound 21  | 0.91                                               |
| Compound 9/Compound 23  | 0.91                                               |
| Compound 10/Compound 13 | 0.91                                               |
| Compound 10/Compound 14 | 0.82                                               |
| Compound 10/Compound 15 | 0.87                                               |
| Compound 10/Compound 17 | 0.91                                               |
| Compound 10/Compound 18 | 0.82                                               |
| Compound 10/Compound 19 | 0.87                                               |
| Compound 10/Compound 20 | 0.87                                               |
| Compound 10/Compound 21 | 0.87                                               |
| Compound 10/Compound 23 | 0.87                                               |
| Compound 11/Compound 14 | 0.91                                               |
| Compound 12/PFPeA       | 0.82                                               |
| Compound 13/Compound 18 | 0.91                                               |
| Compound 13/Compound 19 | 0.96                                               |
| Compound 13/Compound 20 | 0.96                                               |
| Compound 13/Compound 21 | 0.96                                               |
| Compound 13/Compound 23 | 0.96                                               |
| Compound 13/PFOA        | 0.82                                               |
| Compound 13/PFNA        | 0.82                                               |
| Compound 14/Compound 15 | 0.96                                               |
| Compound 14/PFHpA       | 0.82                                               |
| Compound 16/PFOS        | 0.87                                               |
| Compound 17/Compound 18 | 0.91                                               |
| Compound 17/Compound 19 | 0.96                                               |
| Compound 17/Compound 20 | 0.96                                               |
| Compound 17/Compound 21 | 0.96                                               |
| Compound 17/Compound 23 | 0.96                                               |
| Compound 17/PFOA        | 0.82                                               |
| Compound 17/PFNA        | 0.82                                               |
| Compound 18/Compound 19 | 0.96                                               |
| Compound 18/Compound 20 | 0.96                                               |
| Compound 18/Compound 21 | 0.96                                               |
| Compound 18/Compound 23 | 0.96                                               |
| Compound 18/PFOA        | 0.82                                               |
| Compound 18/PFNA        | 0.91                                               |
| Compound 19/Compound 20 | 1.0                                                |
| Compound 19/Compound 21 | 1.0                                                |
| Compound 19/Compound 23 | 1.0                                                |
| Compound 19/PFOA        | 0.87                                               |
| Compound 19/PFNA        | 0.87                                               |

| <b>Compound Pair</b>    | <b>Correlation Coefficient (<math>\tau</math>)</b> |
|-------------------------|----------------------------------------------------|
| Compound 20/Compound 21 | 1.0                                                |
| Compound 20/Compound 23 | 1.0                                                |
| Compound 20/PFOA        | 0.87                                               |
| Compound 20/PFNA        | 0.87                                               |
| Compound 21/Compound 23 | 1.0                                                |
| Compound 21/PFOA        | 0.87                                               |
| Compound 21/PFNA        | 0.87                                               |
| Compound 23/PFOA        | 0.87                                               |
| Compound 23/PFNA        | 0.87                                               |
| <b>Rockford, OH</b>     |                                                    |
| Compound 3/Compound 19  | 0.93                                               |
| Compound 5/PFHxA        | 0.86                                               |
| <b>Ashland, OH</b>      |                                                    |
| Compound 1/TFA          | 0.81                                               |
| Compound 1/PFHpA        | 0.81                                               |
| Compound 1/PFOA         | 0.81                                               |
| Compound 2/HFPO-DA      | 0.91                                               |
| Compound 2/Compound 1   | 0.91                                               |
| Compound 3/PFBA         | 0.81                                               |
| Compound 3/Compound 5   | 0.91                                               |
| Compound 3/Compound 14  | 0.91                                               |
| Compound 3/Compound 21  | 0.91                                               |
| Compound 5/Compound 14  | 0.81                                               |
| Compound 5/Compound 21  | 0.81                                               |
| Compound 8/Compound 15  | 0.84                                               |
| Compound 9/PFHpA        | 0.81                                               |
| Compound 9/PFOA         | 0.81                                               |
| Compound 9/PFNA         | 0.81                                               |
| Compound 9/PFOS         | 0.81                                               |
| Compound 14/PFBA        | 0.91                                               |
| Compound 14/PFHpA       | 0.81                                               |
| Compound 14/PFOA        | 0.81                                               |
| Compound 16/PFNA        | 0.81                                               |
| Compound 16/PFDA        | 0.81                                               |
| Compound 16/PFOS        | 0.91                                               |
| <b>Whitestown, IN</b>   |                                                    |
| Compound 2/Compound 20  | 1.0                                                |
| Compound 11/TFA         | 1.0                                                |
| Compound 11/PFBA        | 1.0                                                |
| Compound 11/PFHxA       | 1.0                                                |
| Compound 11/PFOA        | 1.0                                                |
| <b>Willoughby, OH</b>   |                                                    |
| Compound 1/Compound 2   | 0.82                                               |
| Compound 4/Compound 14  | 0.85                                               |

**Table S22.** Correlations among PFAS at Wooster

| <b>Compound</b>       | <b>Class</b> | <b>Chain Length</b> |
|-----------------------|--------------|---------------------|
| <b><i>Group A</i></b> |              |                     |
| 1                     | FTCA         | C4                  |
| 2                     | PFCA         | C3                  |
| 3                     | FTCA         | C5                  |
| 12                    | H-PFCA       | C7                  |
| <b><i>Group B</i></b> |              |                     |
| 6                     | H-PFdiCA     | C10                 |
| 8                     | H-PFdiCA     | C10                 |
| 9                     | oPFSA        | C8                  |
| 10                    | PFECA+       | C12                 |
| 13                    | FTCA         | C9                  |
| 14                    | H-PFCA       | C8                  |
| 15                    | FTUCA        | C8                  |
| 17                    | FTCA         | C10                 |
| 18                    | H-PFCA       | C9                  |
| 19                    | FTCA         | C11                 |
| 20                    | H-PFCA       | C10                 |
| 21                    | FTCA         | C12                 |
| 23                    | FTCA         | C13                 |
| PFOA                  | PFCA         | C8                  |
| PFNA                  | PFCA         | C9                  |

Class abbreviations are defined in **Table S1**.

**Table S23.** Correlation coefficients between each compound and principal component

| Compound <sup>(a)</sup> | PC1                        | PC2           |
|-------------------------|----------------------------|---------------|
| 1                       | <b>0.980<sup>(b)</sup></b> | -0.053        |
| 2                       | <b>0.981</b>               | -0.032        |
| 3                       | <b>0.983</b>               | -0.019        |
| 4                       | 0.028                      | 0.163         |
| 5                       | 0.665                      | -0.100        |
| 6                       | <b>0.996</b>               | 0.045         |
| 7                       | <b>0.992</b>               | 0.028         |
| 8                       | <b>0.993</b>               | 0.059         |
| 9                       | <b>0.998</b>               | 0.022         |
| 10                      | <b>0.995</b>               | 0.055         |
| 11                      | <b>0.988</b>               | 0.060         |
| 12                      | <b>0.966</b>               | 0.077         |
| 13                      | <b>0.999</b>               | 0.047         |
| 14                      | <b>0.996</b>               | 0.025         |
| 15                      | <b>0.983</b>               | 0.066         |
| 16                      | 0.502                      | <b>-0.354</b> |
| 17                      | <b>0.998</b>               | 0.050         |
| 18                      | <b>0.998</b>               | 0.025         |
| 19                      | <b>0.997</b>               | 0.049         |
| 20                      | <b>0.998</b>               | 0.027         |
| 21                      | <b>0.997</b>               | 0.045         |
| 23                      | <b>0.998</b>               | 0.031         |
| TFA                     | 0.750                      | <b>-0.661</b> |
| PFBA                    | <b>0.985</b>               | -0.039        |
| PFPeA                   | <b>0.989</b>               | -0.020        |
| PFHxA                   | <b>0.989</b>               | -0.090        |
| PFHpA                   | <b>0.988</b>               | -0.071        |
| PFOA                    | <b>0.970</b>               | -0.203        |
| PFNA                    | <b>0.982</b>               | -0.139        |
| PFDA                    | 0.778                      | -0.162        |
| PFOS                    | 0.520                      | -0.270        |
| HFPO-DA                 | 0.041                      | <b>-0.336</b> |

<sup>(a)</sup> Compounds with orange shading are strongly correlated (coefficient > 0.90) to principal component 1, and compounds with blue shading are strongly correlated to principal component 2.

<sup>(b)</sup> Bolded coefficients indicate a substantial contribution from that compound to the component.

**Figure S1.** Map of collection sites

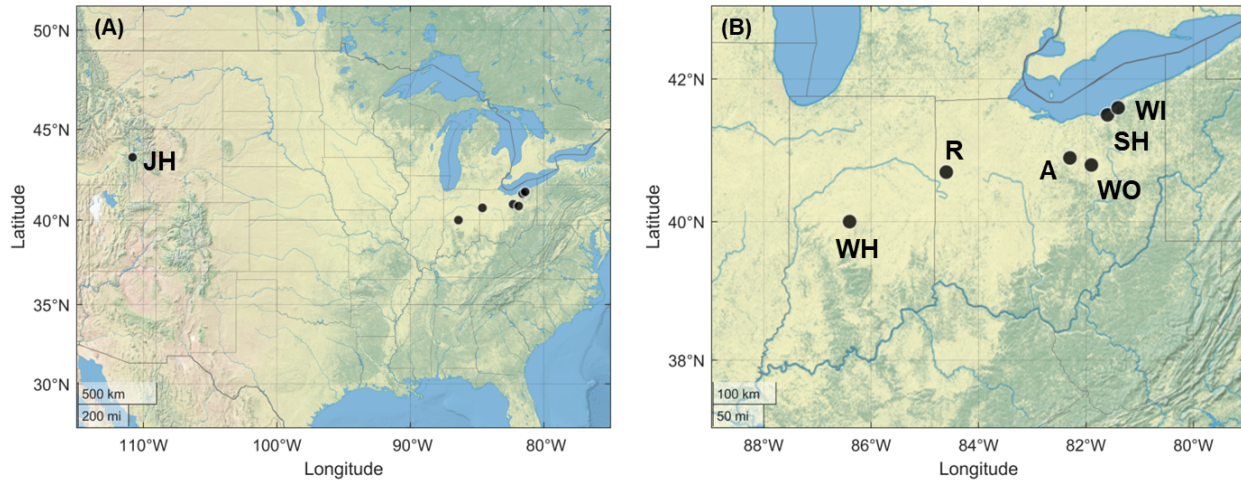

**Figure S1.** (A) Map showing the location of all seven collection sites: JH = Jackson Hole, WY. (B) Map of the six collection sites in the Indiana/Ohio region: WH = Whitestown, IN; R = Rockford, OH; A = Ashland, OH; WO = Wooster, OH; SH = Shaker Heights, OH; WI = Willoughby, OH.



**Figure S2.** Kendrick mass defect plot

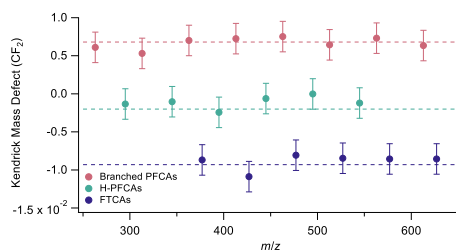

**Figure S2.** Kendrick mass defect plot showing homologous series of branched PFCAs (pink), H-substituted PFCAs (teal), and FTCAs (indigo) that differ by CF<sub>2</sub> repeating units. The Kendrick mass is calculated by multiplying the mass-to-charge ratio ( $m/z$ ) of the feature of interest by the ratio of the nominal mass to the exact mass for the repeating unit in the homologous series. For CF<sub>2</sub>, this ratio is 50/49.9968. The Kendrick mass defect is the difference between the Kendrick mass rounded to the nearest whole number and the exact Kendrick mass. Here the error bars show a tolerance of  $\pm 2$  mDa. See the references by Kendrick<sup>4</sup> and by Bugsel and Zwiener<sup>5</sup> for additional information.

**Figure S3.** Retention times for homologous series

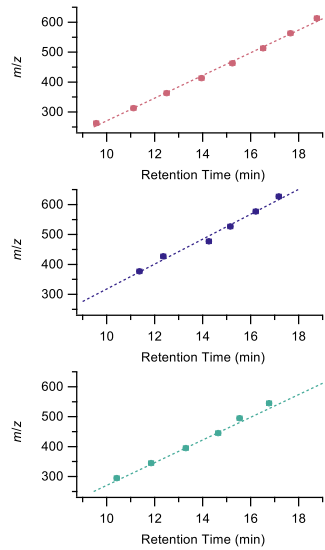

**Figure S3.** Plots of mass-to-charge ratio ( $m/z$ ) versus retention time for the homologous series of (A) branched PFCAs, (B) FTCAs, and (C) H-substituted PFCAs. The error bars represent an uncertainty of  $\pm 0.1$  minutes to match the tolerance of the MS-DIAL analysis.

**Figure S4.** Extracted ion chromatograms for PFOA

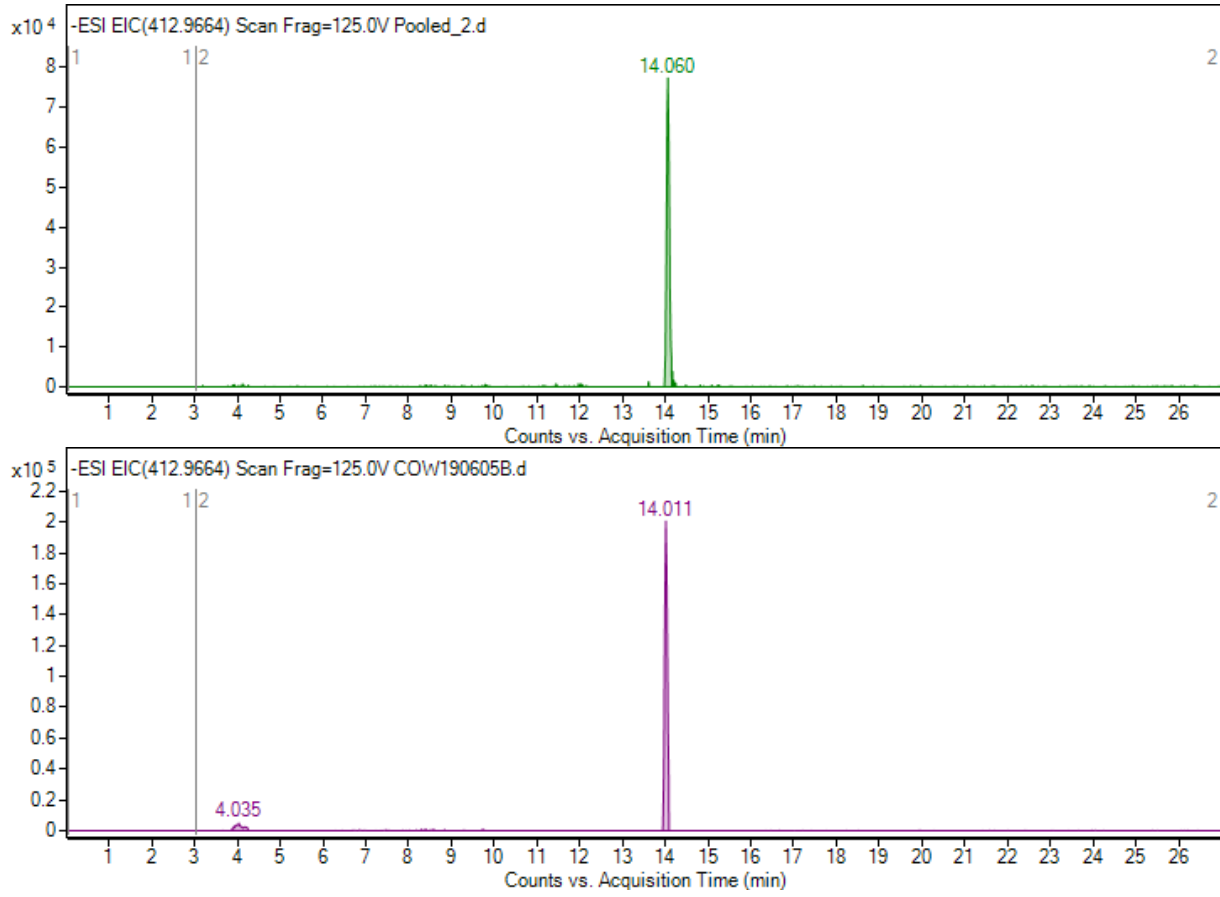

**Figure S4.** Extraction ion chromatograms for PFOA (perfluorooctanoic acid,  $m/z = 412.9964$ ) for the pooled sample (top) and the Wooster sample collected 5 June 2019 (bottom).

**Figure S5.** Extracted ion chromatograms for PFHxS

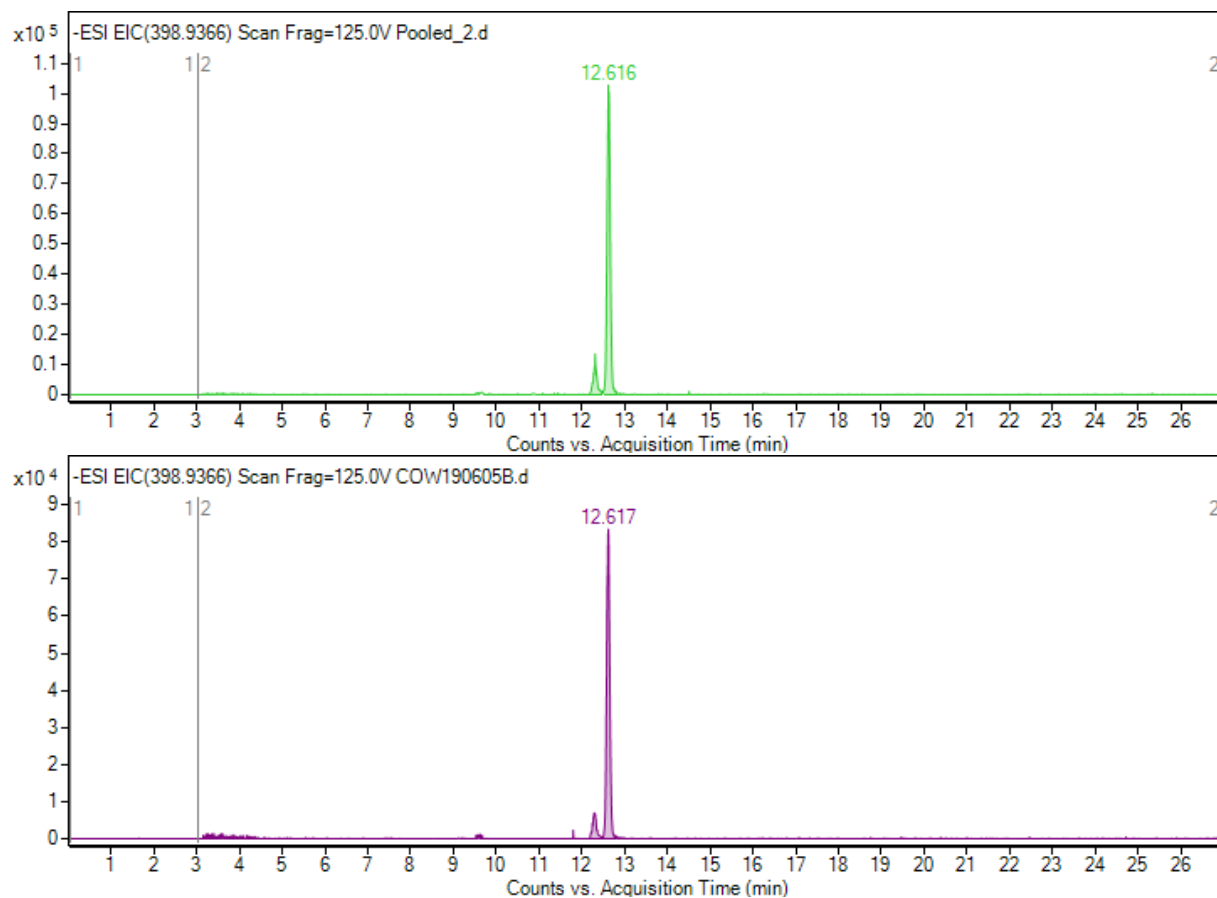

**Figure S5.** Extraction ion chromatograms for PFHxS (perfluorohexane sulfonic acid,  $m/z = 398.9366$ ) for the pooled sample (top) and the Wooster sample collected 5 June 2019 (bottom).

**Figure S6.** Literature comparison of FTCAs and FTUCAs in precipitation

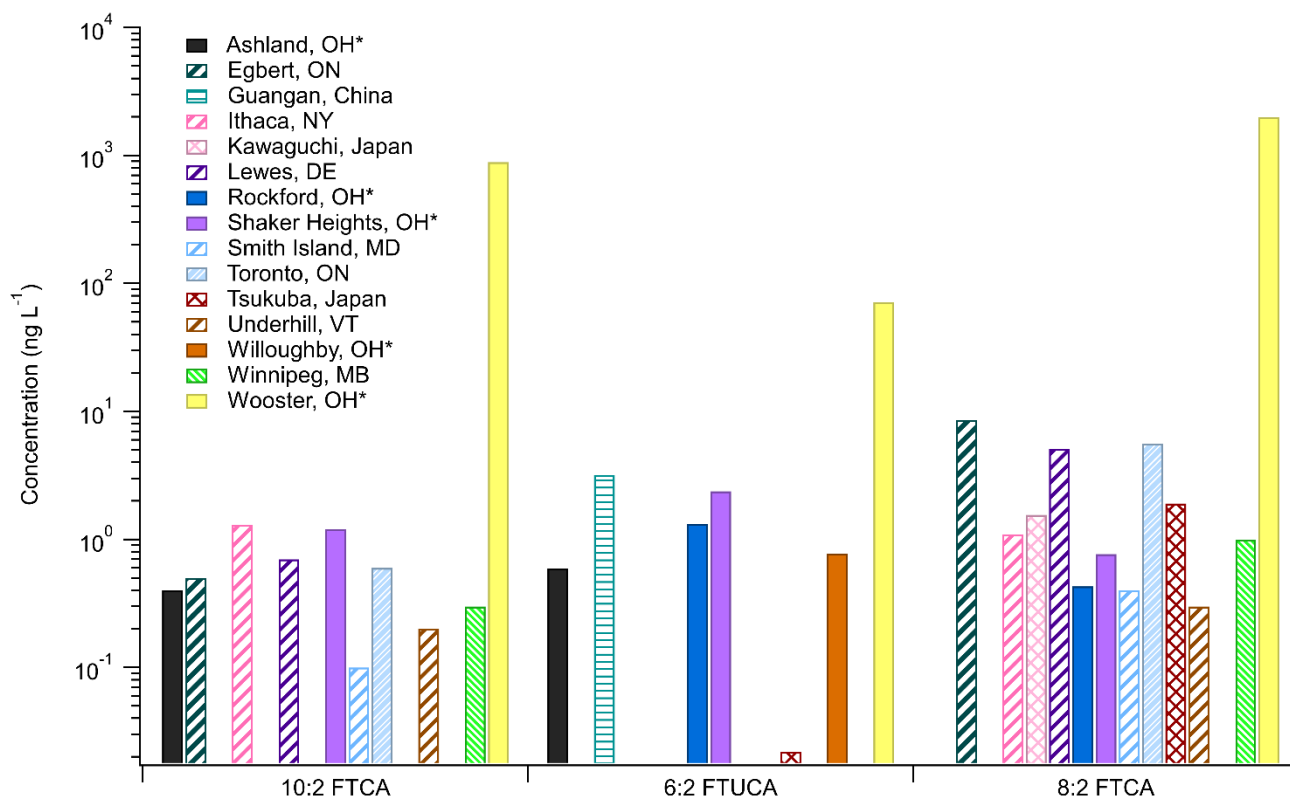

**Figure S6.** Comparison of the maximum concentrations of 10:2 FTCA, 6:2 FTUCA, and 8:2 FTCA measured in rainfall between 1999 and the present. The Smith Island, Maryland; Lewes, Delaware; Ithaca, New York; and Underhill, Vermont sites in the U.S. were sampled by Scott et al.<sup>6</sup> in 1999. The Egbert and Toronto, Ontario sites in Canada were sampled by Scott et al.<sup>6</sup> in 2002. The Winnipeg, Manitoba site was sampled by Loewen et al.<sup>7</sup> in 2004. The Tsukuba and Kawaguchi, Japan sites were sampled by Taniyasu et al.<sup>8</sup> in 2007. The Guangan, Sichuan site in China was sampled by Zhao et al.<sup>9</sup> in 2010. Sites labelled with an asterisk were sampled by Pike et al.<sup>1</sup> in 2019 and analyzed in this work.

**Figure S7.** Boxplot of PFAS deposition flux by chain length grouping and site

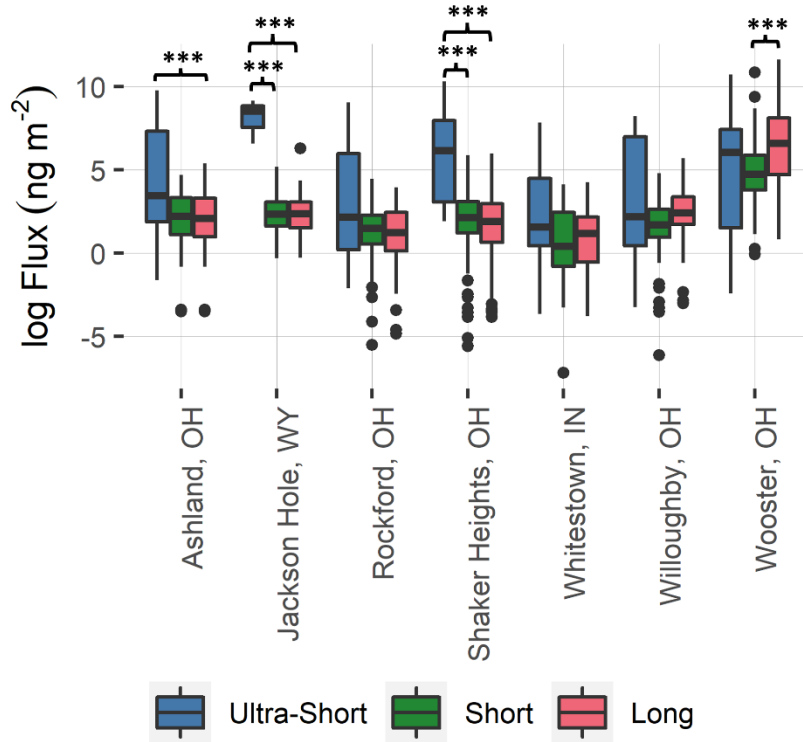

**Figure S7.** Boxplot comparing log flux (in  $\text{ng m}^{-2}$ ) of differing chain length PFAS at each sampling site. Black asterisks indicate statistically different ( $p < 0.05$ ) fluxes of chain lengths at that site.

**Figure S8.** Boxplot of PFAS deposition flux comparing functional class within site.

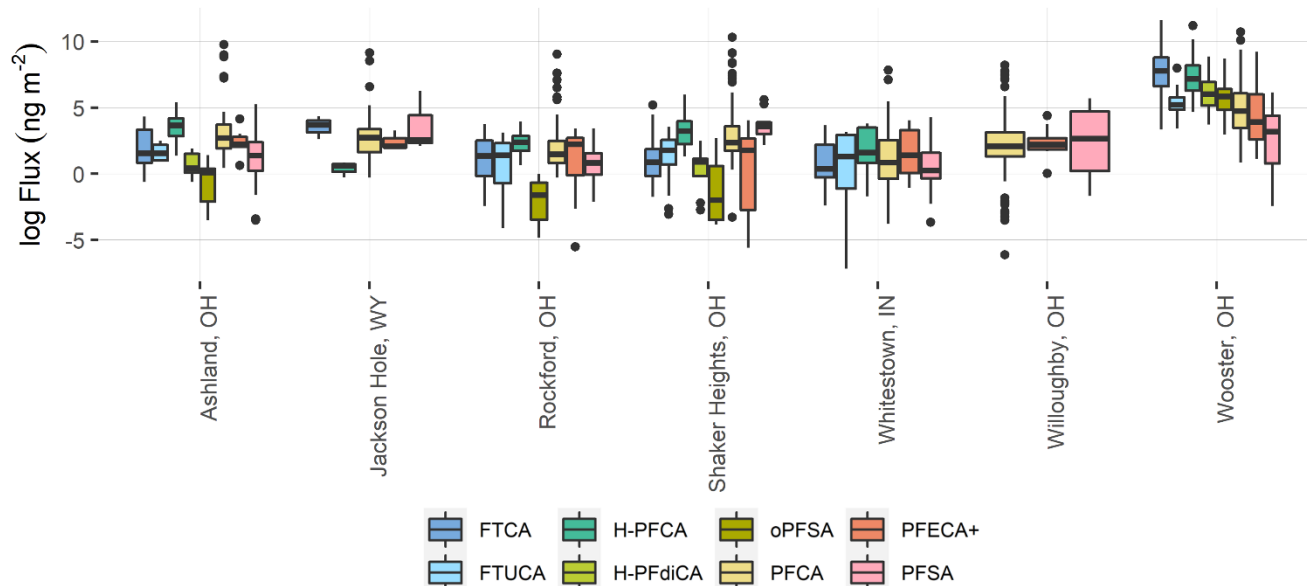

**Figure S8.** Boxplot comparing log flux (in  $\text{ng m}^{-2}$ ) of different functional classes of PFAS at each sampling site. See **Table S17** for statistically significant comparisons. From left to right, the classes are FTCA (light blue), FTUCAs (light cyan), H-PFCAs (mint), H-PFDiCAs (pear), oPFSAs (olive), PFCAs (light yellow), PFECAs+ (orange), and PFSAs (pink). Acronyms are defined in **Table S1**.

**Figure S9.** Boxplot of PFAS deposition flux comparing sites within each functional class

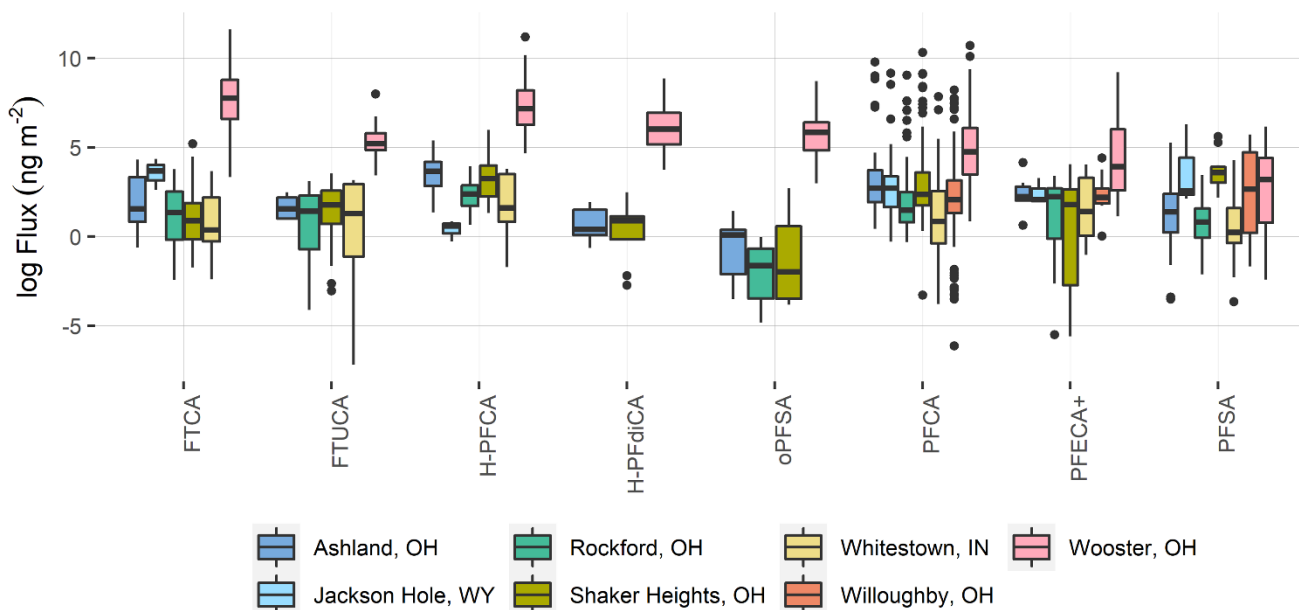

**Figure S9.** Boxplot comparing log flux (in  $\text{ng m}^{-2}$ ) at each sampling site in terms of PFAS functional class. See **Table S19** for statistically significant comparisons. From left to right, the sites are Ashland, OH (light blue); Jackson Hole, WY (light cyan); Rockford, OH (mint); Shaker Heights, OH (olive); Whitestown, IN (light yellow); Willoughby, OH (orange); and Wooster, OH (pink). Acronyms are defined in **Table S1**.



**Figure S10.** Scree plot

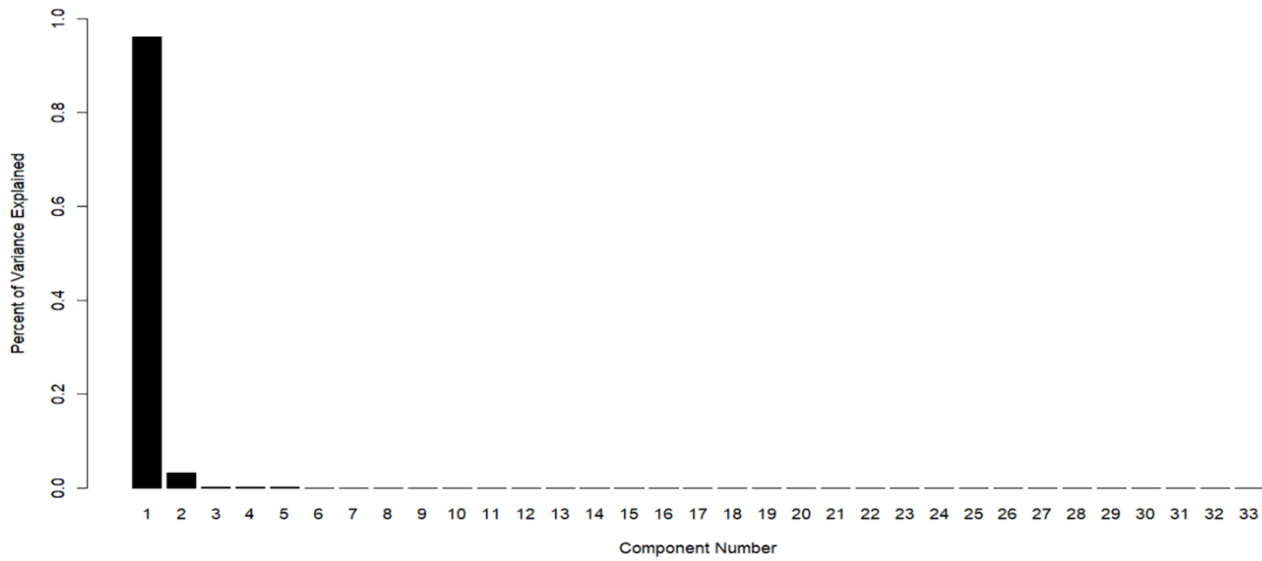

**Figure S10.** Scree plot for principal component analysis.

**Figure S11.** Principal component analysis

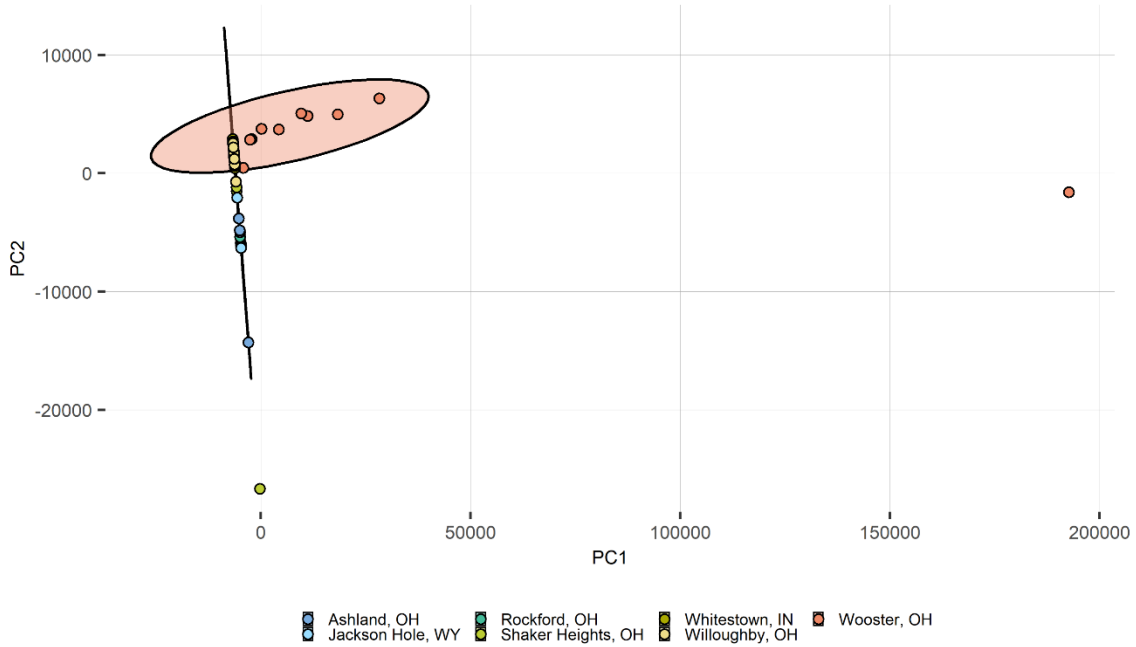

**Figure S11.** Principal component analysis of estimated PFAS deposition fluxes from each rainwater sample. The outlier on the far right is the 6 July 2019 sample from Wooster, OH. Data points are colored by sampling site: Ashland, OH (light blue); Jackson Hole, WY (light cyan); Rockford, OH (mint); Shaker Heights, OH (olive); Whitestown, IN (light yellow); Willoughby, OH (orange); and Wooster, OH (pink).

## Appendix A: LC-MS/MS Data for Qualified Emerging PFAS (Table 1)

### Compound 1: 2:1 FT carboxylic acid

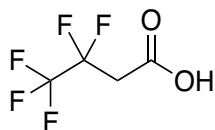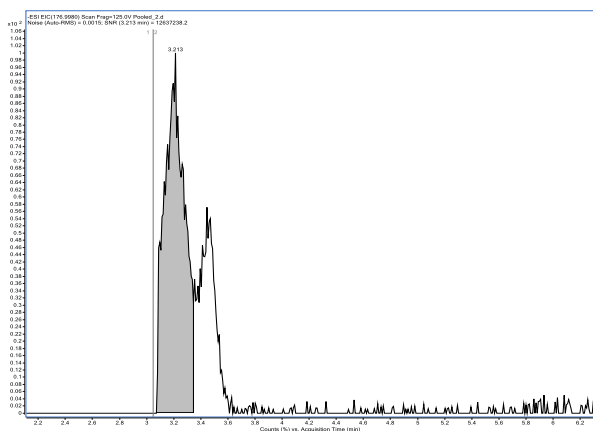

Retention time: 3.21 min

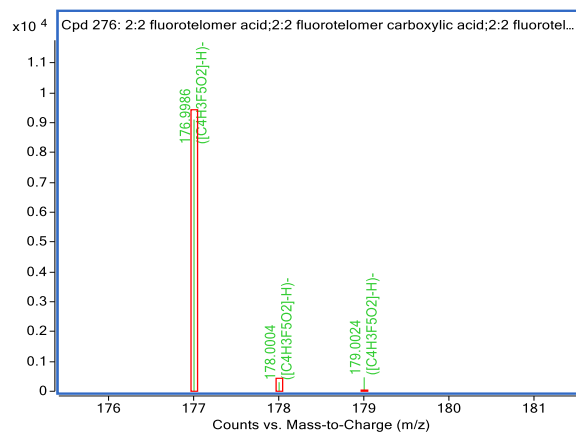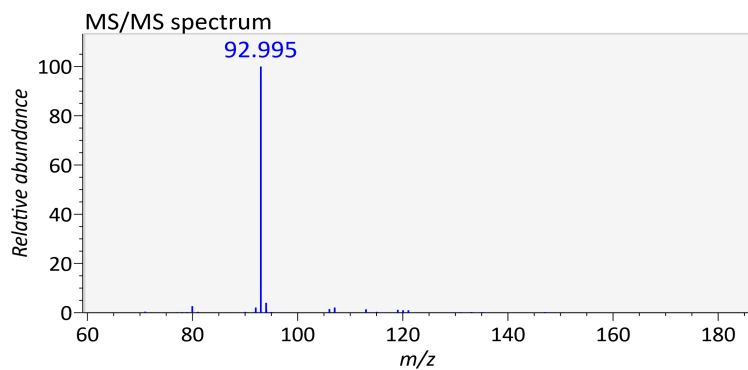

CE= 40V

| MS/MS ion (m/z) | Molecular formula | Match               |
|-----------------|-------------------|---------------------|
| 92.995          | $C_3F_3^-$        | Fluoromatch Library |

**Compound 2: Perfluoropropionic acid**

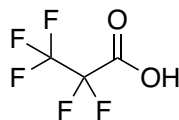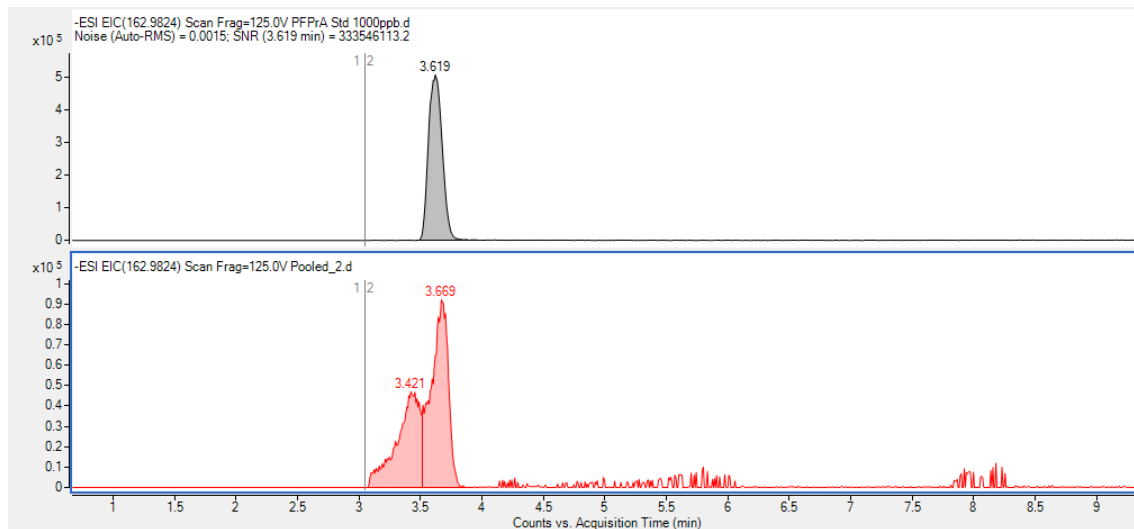

Top: chromatogram of standard; Bottom: Chromatogram of pooled sample

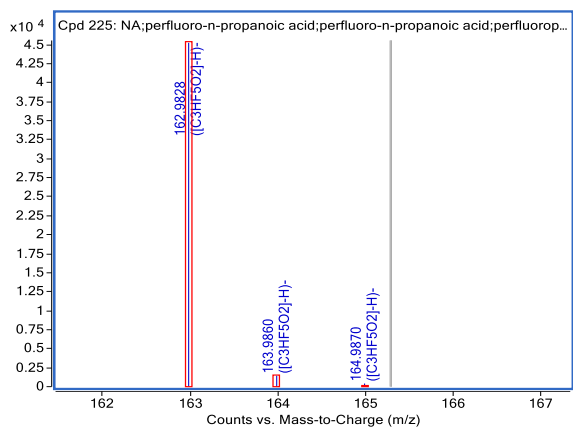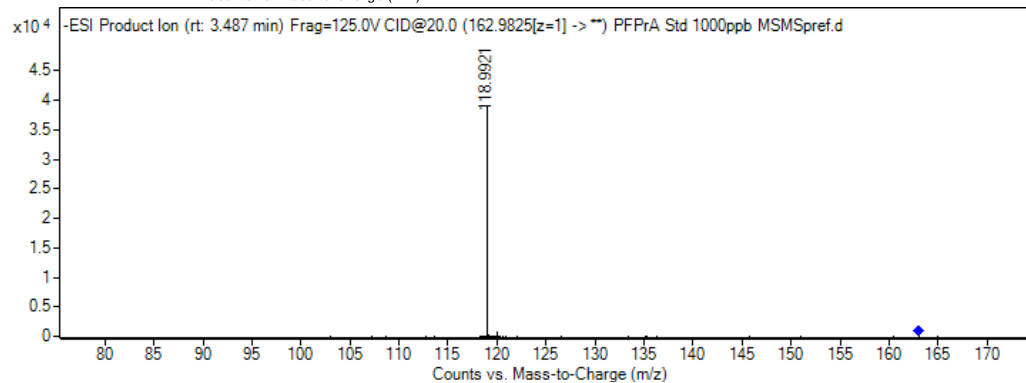

CE = in source fragmentation and 20V

| MS/MS ion (m/z) | Molecular formula                          | Match    |
|-----------------|--------------------------------------------|----------|
| 118.9933        | C <sub>2</sub> F <sub>5</sub> <sup>-</sup> | Standard |

**Compound 3: 3:1 FT carboxylic acid (n=3)**

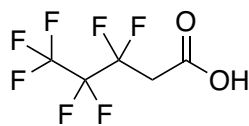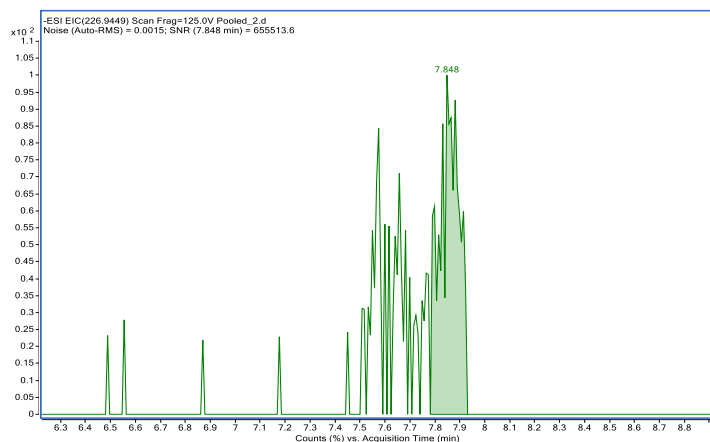

abundance too low for isotopic profile

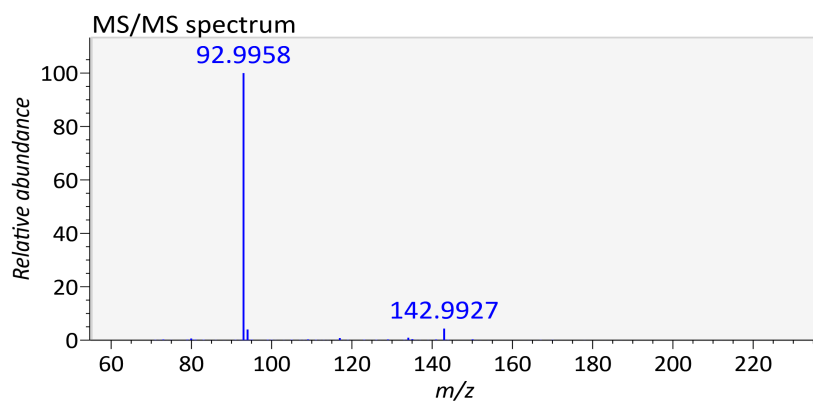

CE= 40V

| MS/MS ion (m/z) | Molecular formula                          | Match               |
|-----------------|--------------------------------------------|---------------------|
| 92.9958         | C <sub>3</sub> F <sub>3</sub> <sup>-</sup> | -                   |
| 142.9927        | C <sub>4</sub> F <sub>3</sub> <sup>-</sup> | Fluoromatch Library |

### Compound 4:PFCA-perfluoroalkyl-Hsubstituted-1DB (n=2)

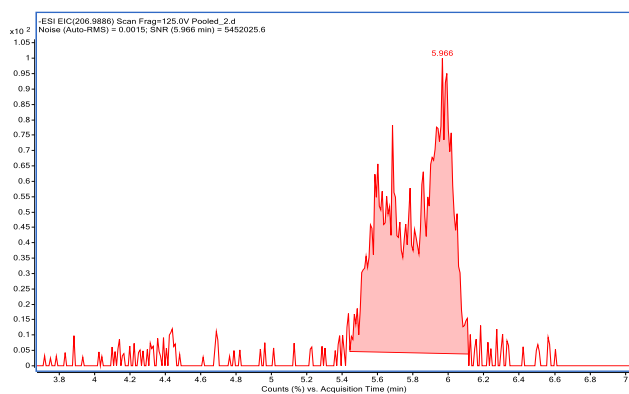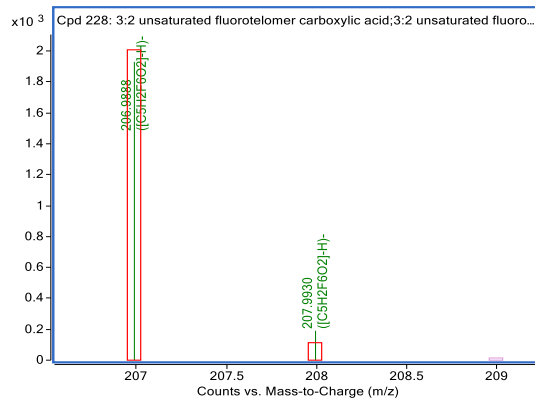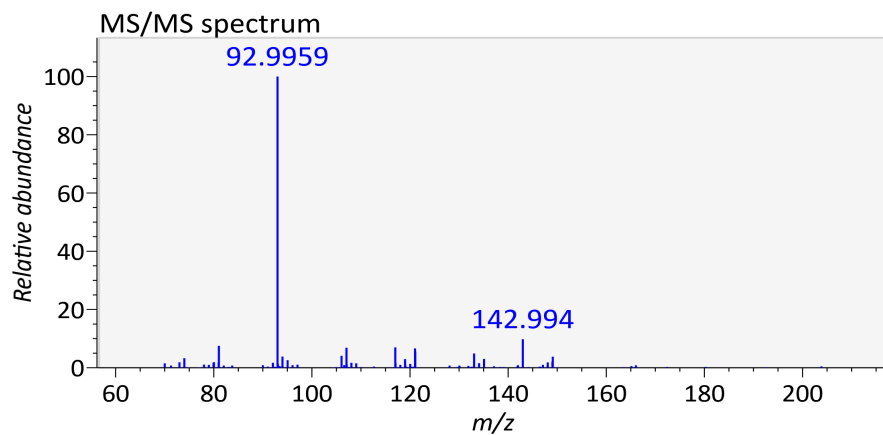

CE = 40V

| MS/MS ion (m/z) | Molecular formula | Match               |
|-----------------|-------------------|---------------------|
| 92.9958         | $C_3F_3^-$        | -                   |
| 142.9927        | $C_4F_3^-$        | Fluoromatch Library |

**Compound 5:** Perfluoropropane sulfonate

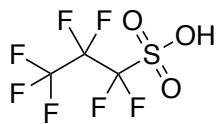

Abundance too low for accurate isotopic profile or chromatogram

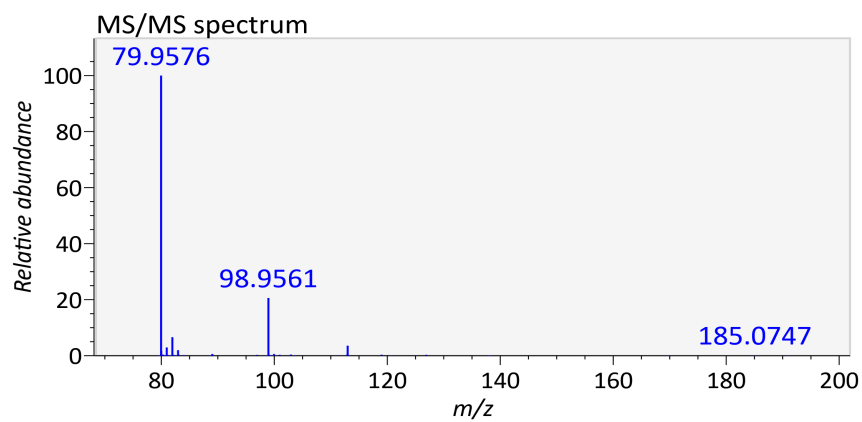

CE = 40V

| MS/MS ion (m/z) | Molecular formula             | Match               |
|-----------------|-------------------------------|---------------------|
| 79.9576         | SO <sub>3</sub> <sup>-</sup>  | Fluoromatch Library |
| 98.9561         | FSO <sub>3</sub> <sup>-</sup> | Fluoromatch Library |

**Compound 6:** bH-substituted perfluoroalkyl dioic acid (n=7)

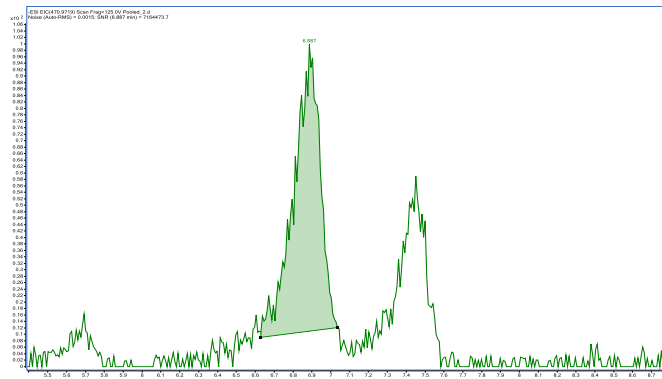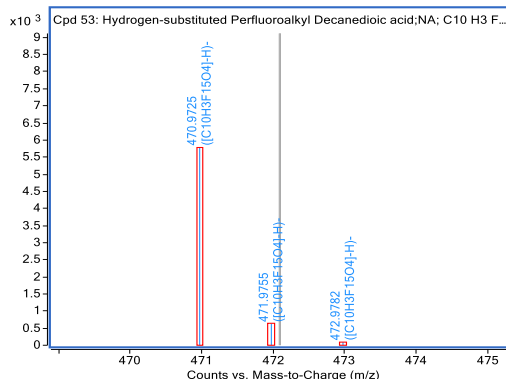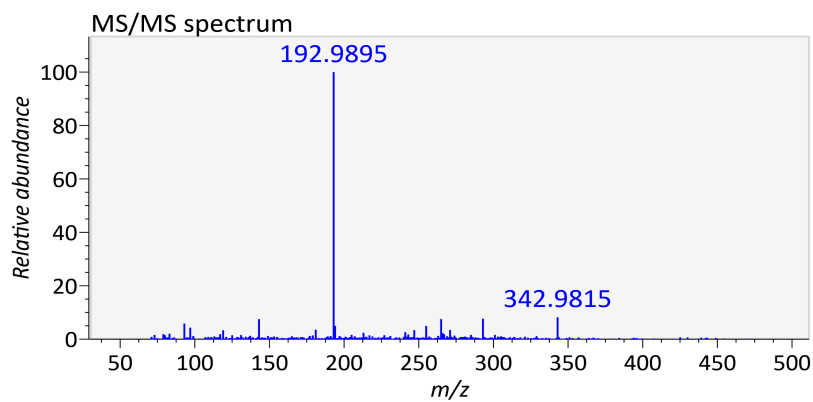

CE= 40V

| MS/MS ion (m/z) | Molecular formula                           | Match               |
|-----------------|---------------------------------------------|---------------------|
| 192.9895        | C <sub>5</sub> F <sub>7</sub> <sup>-</sup>  | -                   |
| 292.9837        | C <sub>7</sub> F <sub>11</sub> <sup>-</sup> | Fluoromatch Library |
| 342.9815        | C <sub>8</sub> F <sub>13</sub> <sup>-</sup> | Fluoromatch Library |



**Compound 7: unsaturated-ether-PFCA (n=2)**

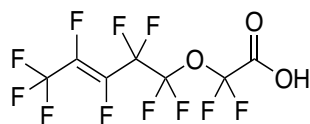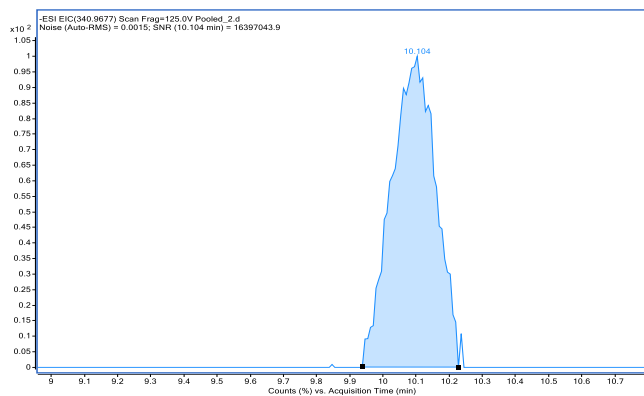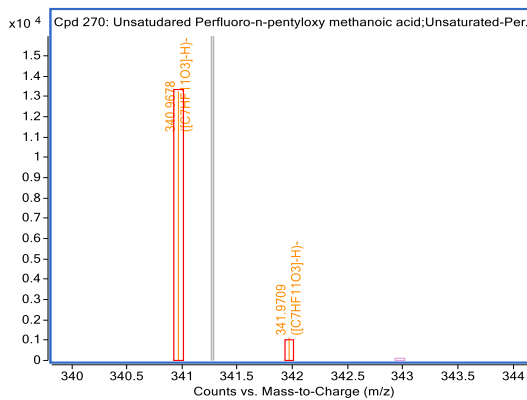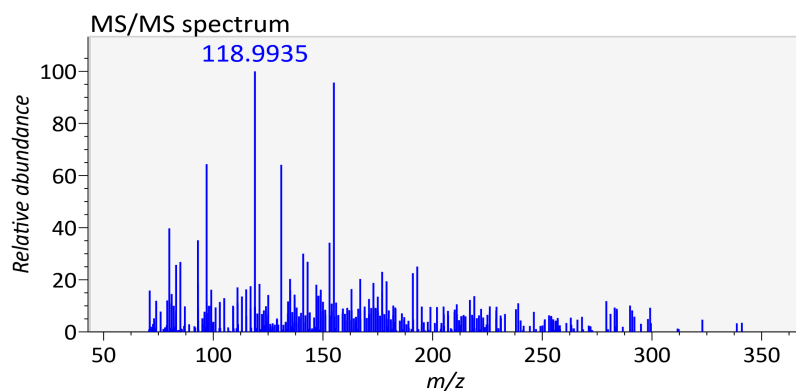

CE = 40V

| MS/MS ion (m/z) | Molecular formula                          | Match               |
|-----------------|--------------------------------------------|---------------------|
| 118.9933        | C <sub>2</sub> F <sub>5</sub> <sup>-</sup> | Fluoromatch Library |

**Compound 8:** H-substituted perfluoroalkyl dioic acid(n=8)

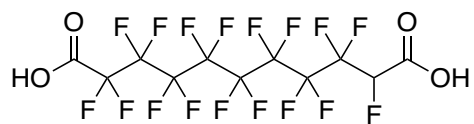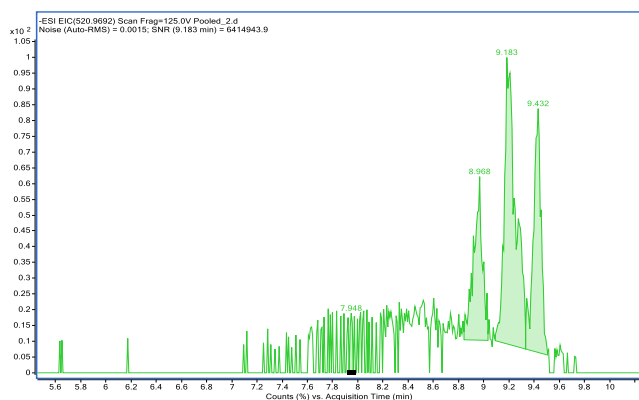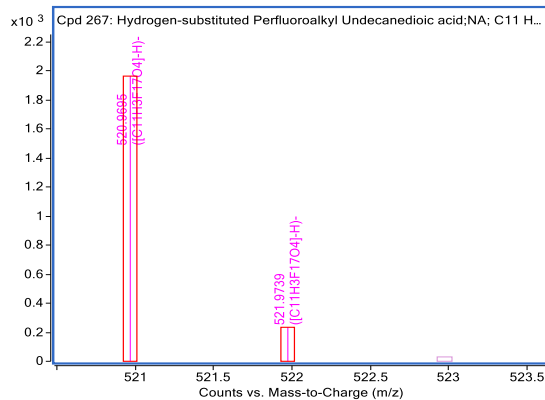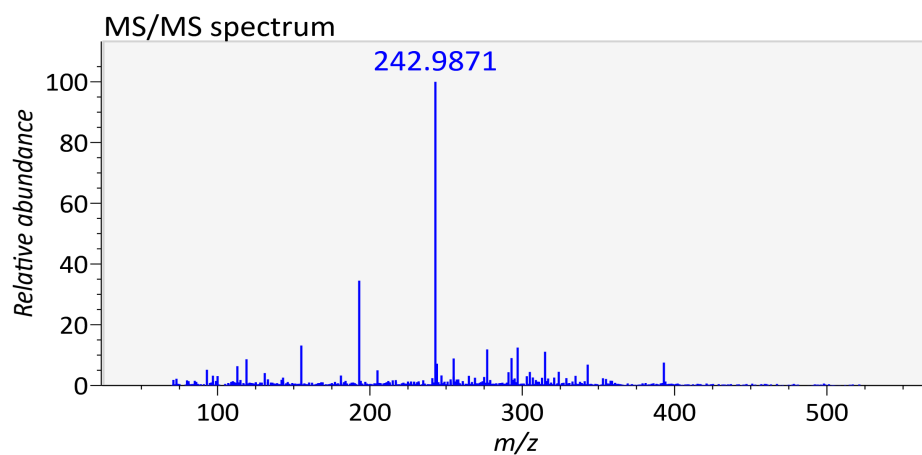

CE= 40V

| MS/MS ion (m/z) | Molecular formula                          | Match               |
|-----------------|--------------------------------------------|---------------------|
| 192.9895        | C <sub>5</sub> F <sub>7</sub> <sup>-</sup> | -                   |
| 242.9871        | C <sub>6</sub> F <sub>9</sub> <sup>-</sup> | Fluoromatch Library |

**Compound 9:** OPFC-perfluoroalkyl sulfate (n=4)

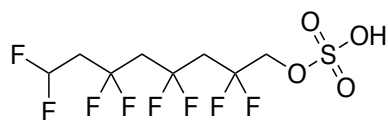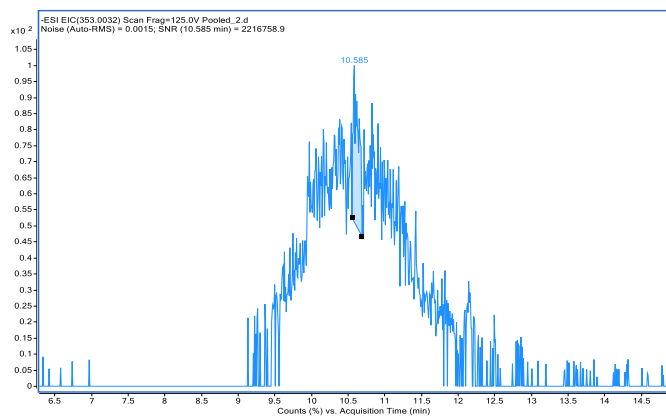

Abundance too low for accurate isotopic profile

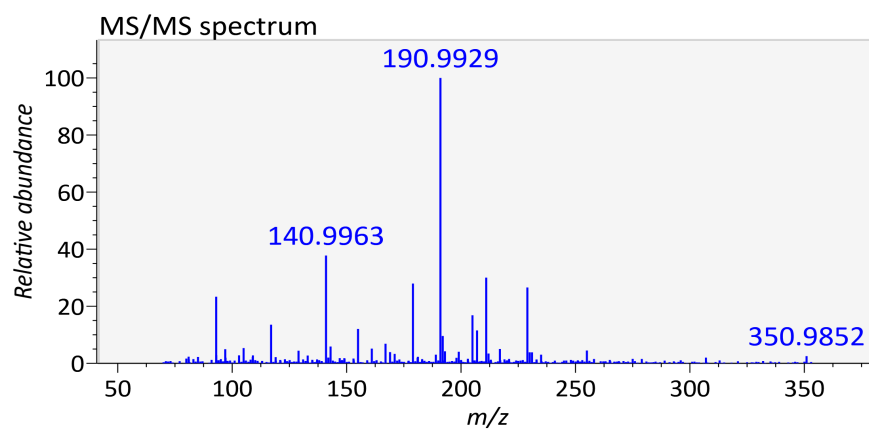

CE= 40V

| MS/MS ion (m/z) | Molecular formula                          | Match               |
|-----------------|--------------------------------------------|---------------------|
| 204.9903        | C <sub>6</sub> F <sub>7</sub> <sup>-</sup> | Fluoromatch Library |

**Compound 10:** H-substituted-unsaturated ether -PFCA (n=7)

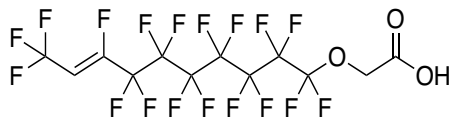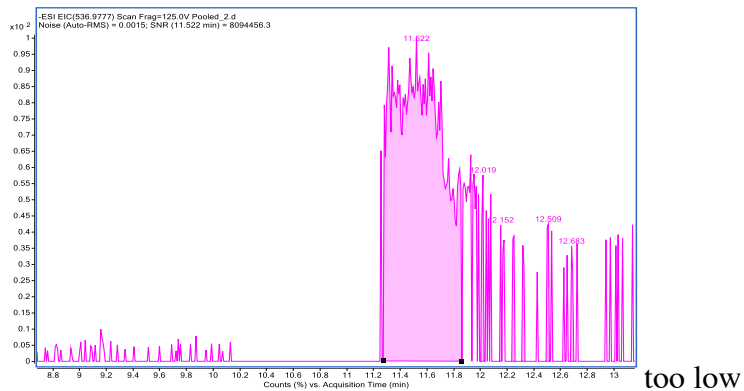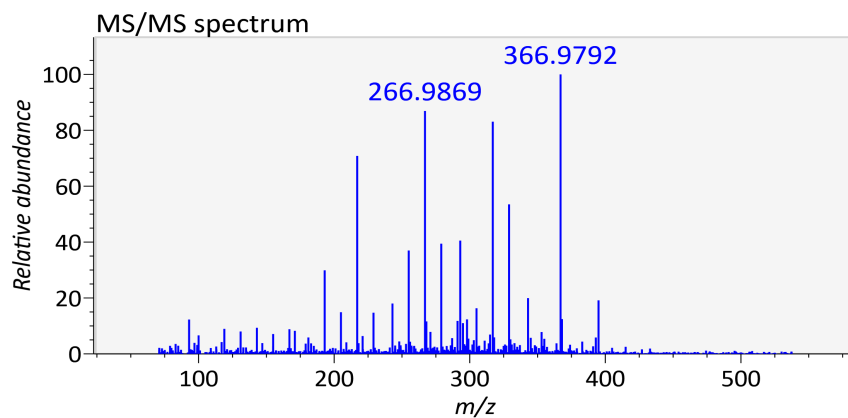

CE= 40V

| MS/MS ion (m/z) | Molecular formula                           | Match               |
|-----------------|---------------------------------------------|---------------------|
| 192.9895        | C <sub>5</sub> F <sub>7</sub> <sup>-</sup>  | Fluoromatch Library |
| 242.9871        | C <sub>6</sub> F <sub>9</sub> <sup>-</sup>  | Fluoromatch Library |
| 292.9826        | C <sub>7</sub> F <sub>11</sub> <sup>-</sup> | Fluoromatch Library |

**Compound 11:** 6:1 FT carboxylic acid (n=6)

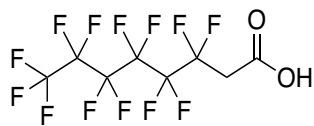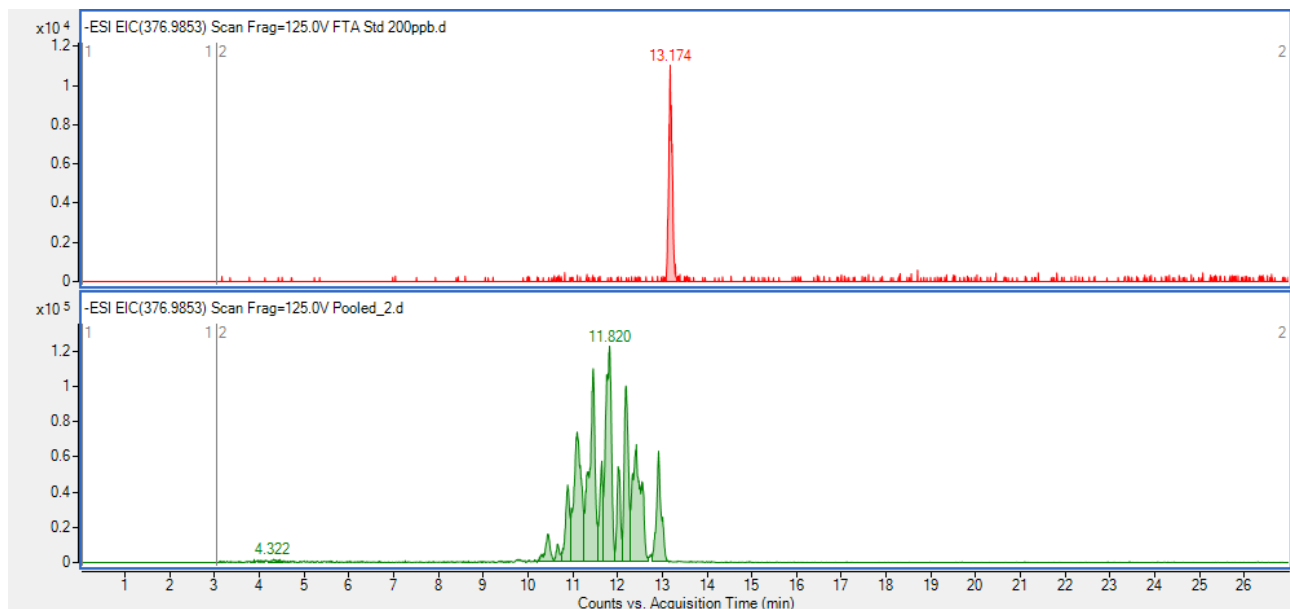

Top: Linear standard 2-perfluorohexyl ethanoic acid (6:2 FTCA): Bottom: Pooled sample

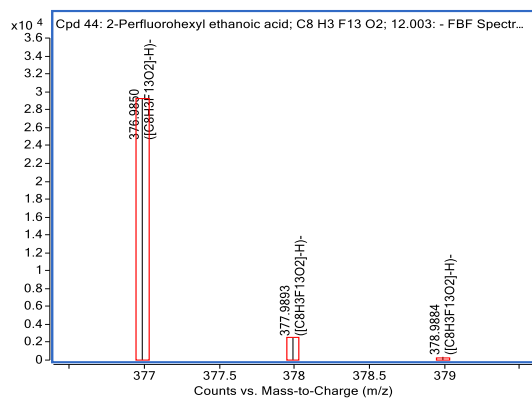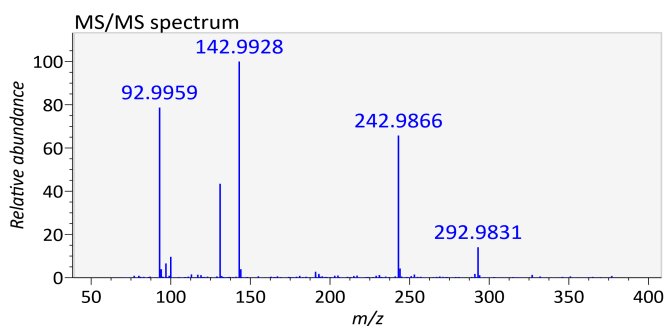

CE= in source fragmentation and 40V

| MS/MS ion (m/z)      | Molecular formula | Match    |
|----------------------|-------------------|----------|
| 92.9959              | $C_3F_3^-$        | -        |
| 142.9928             | $C_4F_5^-$        | Standard |
| 242.9866             | $C_6F_9^-$        | Standard |
| 292.9831 (in source) | $C_7F_{11}^-$     | Standard |

**Compound 12:** H-substituted-PFCA (n=5)

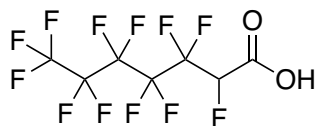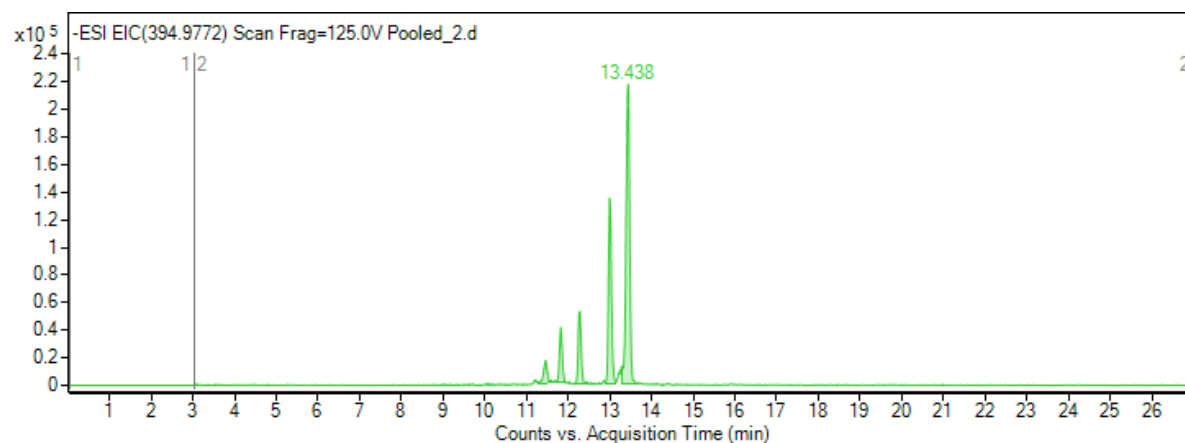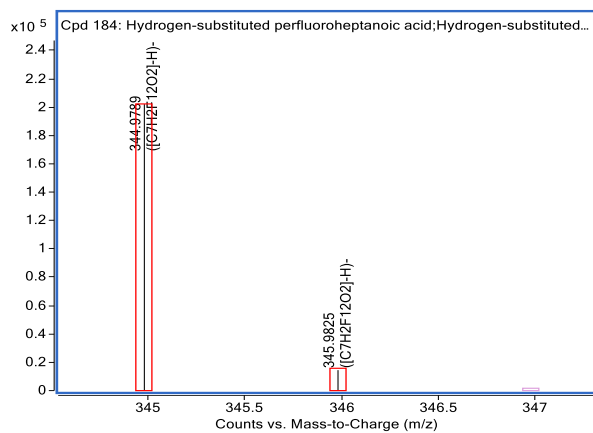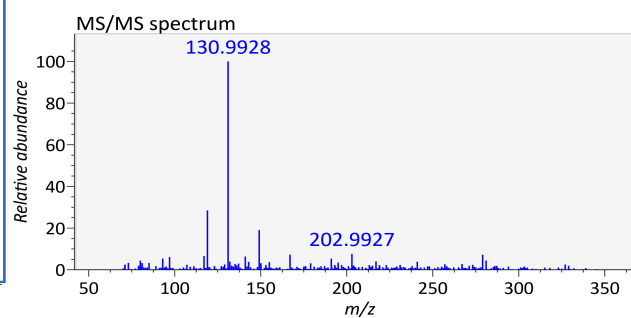

CE = in source fragmentation and 40V

| MS/MS ion (m/z)      | Molecular formula | Match               |
|----------------------|-------------------|---------------------|
| 118.9933             | $C_2F_5^-$        | Fluoromatch Library |
| 280.9828 (in source) | $C_6F_{11}^-$     | -                   |

**Compound 13:** 7:2 FT carboxylic acid (n=7)

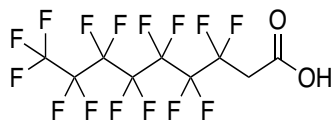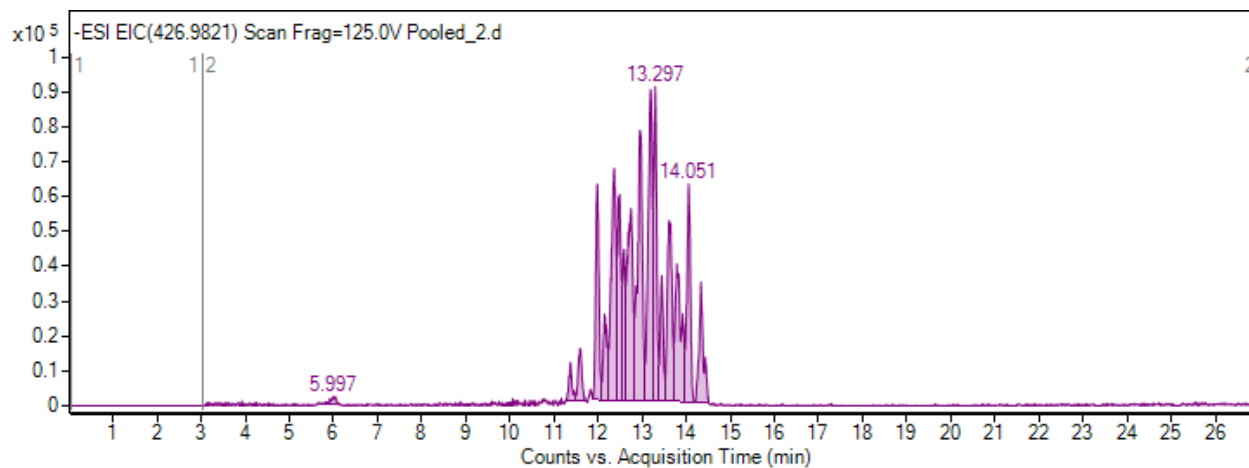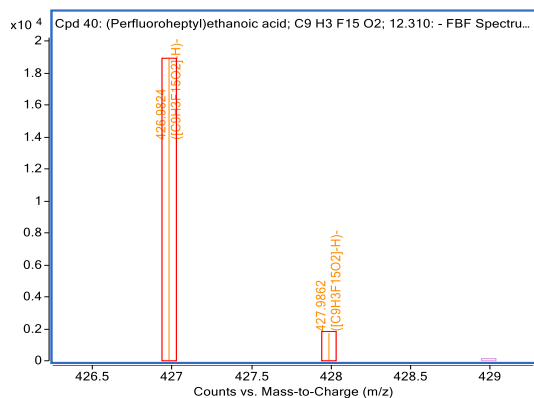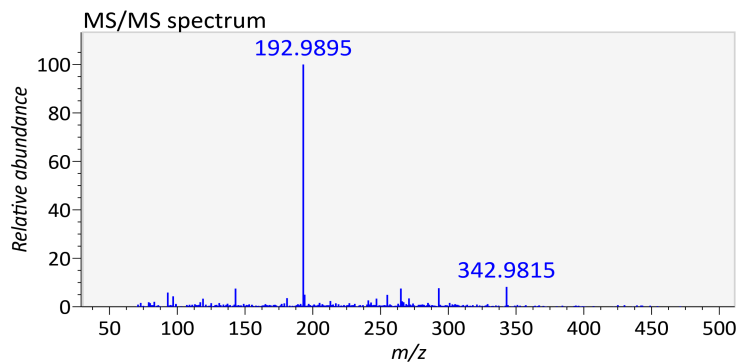

CE= in source fragmentation and 40V

| MS/MS ion (m/z)      | Molecular formula                           | Match               |
|----------------------|---------------------------------------------|---------------------|
| 192.9895             | C <sub>5</sub> F <sub>7</sub> <sup>-</sup>  | Fluoromatch Library |
| 342.9815 (in source) | C <sub>7</sub> F <sub>11</sub> <sup>-</sup> | Fluoromatch Library |

**Compound 14: H-substituted PFCA (n=6)**

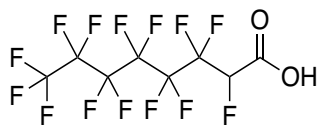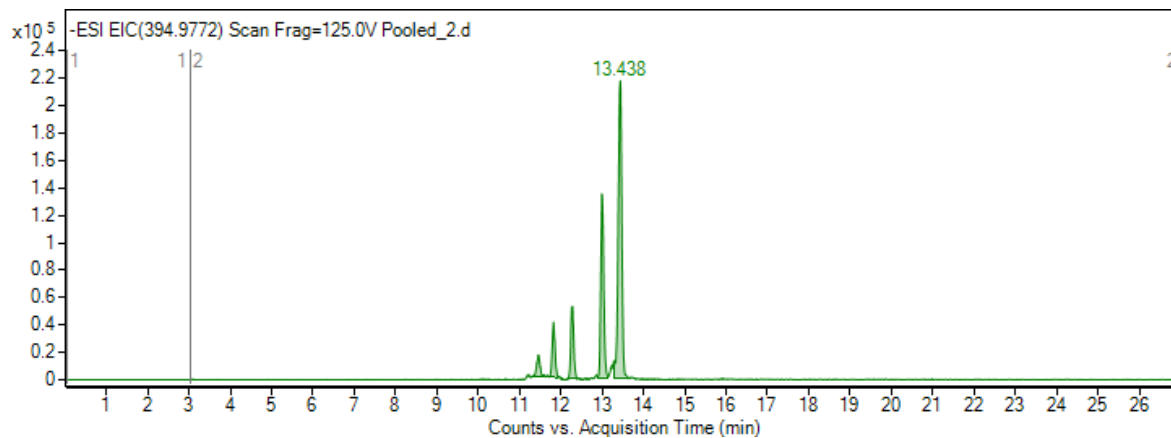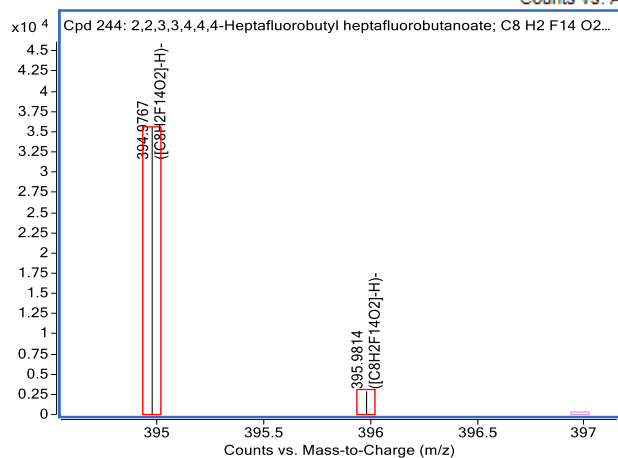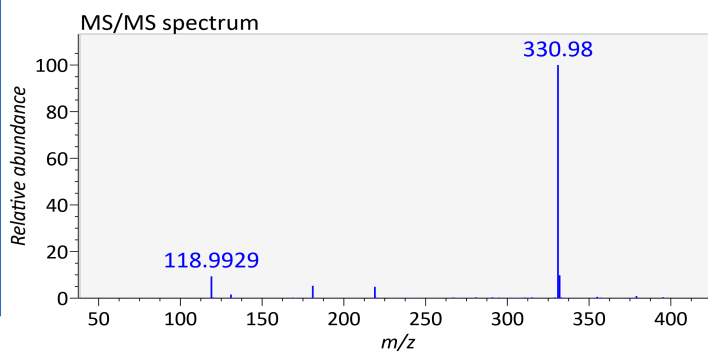

CE = in source fragmentation and 40V

| MS/MS ion (m/z)           | Molecular formula                           | Match               |
|---------------------------|---------------------------------------------|---------------------|
| 118.9933                  | C <sub>2</sub> F <sub>5</sub> <sup>-</sup>  | -                   |
| 330.9800 (in source, 40V) | C <sub>7</sub> F <sub>13</sub> <sup>-</sup> | Fluoromatch Library |



**Compound 15:** PFCA-perfluoroalkyl-Hsubstituted-1DB (n=5)

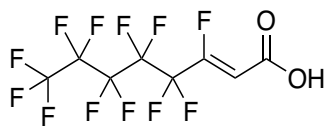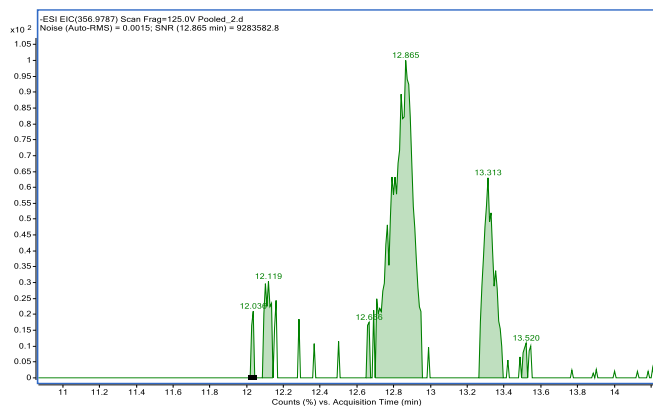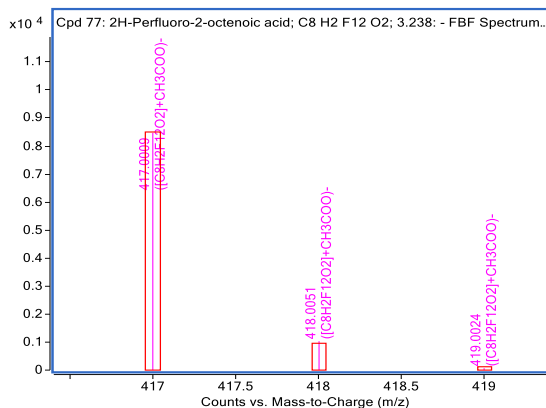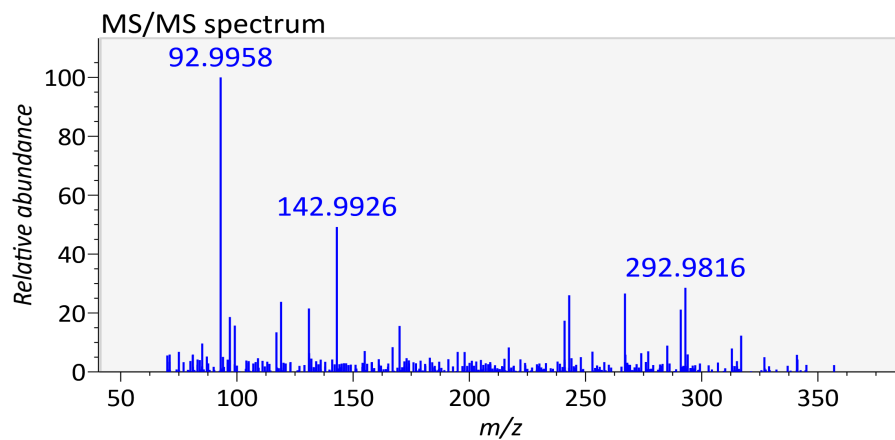

CE= in source fragmentation and 40V

| MS/MS ion (m/z) | Molecular formula                           | Match               |
|-----------------|---------------------------------------------|---------------------|
| 92.9958         | C <sub>3</sub> F <sub>3</sub> <sup>-</sup>  | -                   |
| 142.9926        | C <sub>4</sub> F <sub>5</sub> <sup>-</sup>  | -                   |
| 292.9816        | C <sub>7</sub> F <sub>11</sub> <sup>-</sup> | Fluoromatch Library |

**Compound 16:** Perfluoroalkyl sulfonate (n=7)

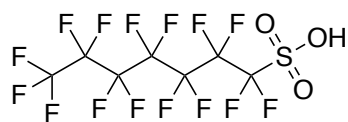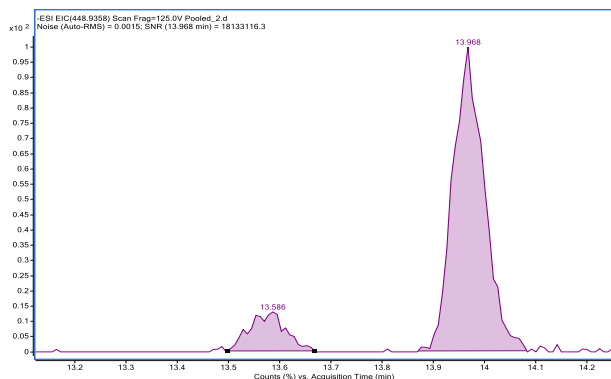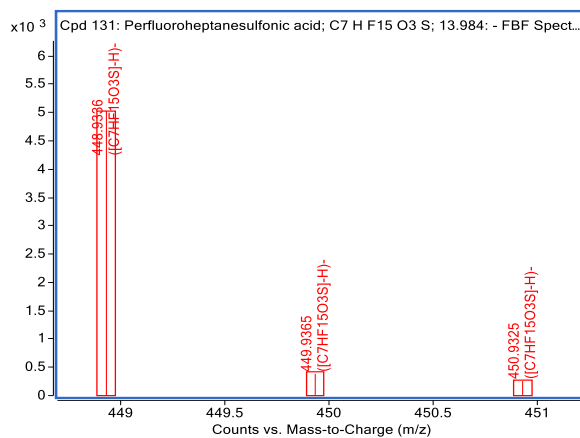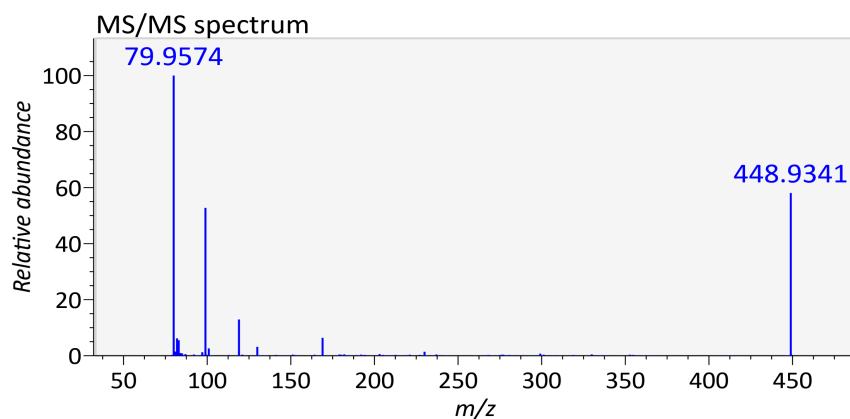

CE = 40V

| MS/MS ion (m/z) | Molecular formula                          | Match               |
|-----------------|--------------------------------------------|---------------------|
| 79.9574         | SO <sub>3</sub> <sup>-</sup>               | Fluoromatch Library |
| 98.9563         | FSO <sub>3</sub> <sup>-</sup>              | -                   |
| 118.9931        | C <sub>2</sub> F <sub>5</sub> <sup>-</sup> | Fluoromatch Library |

**Compound 17:** 8:1 FT carboxylic acid (n=8)

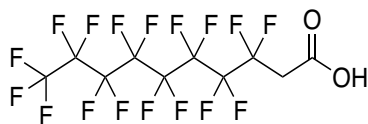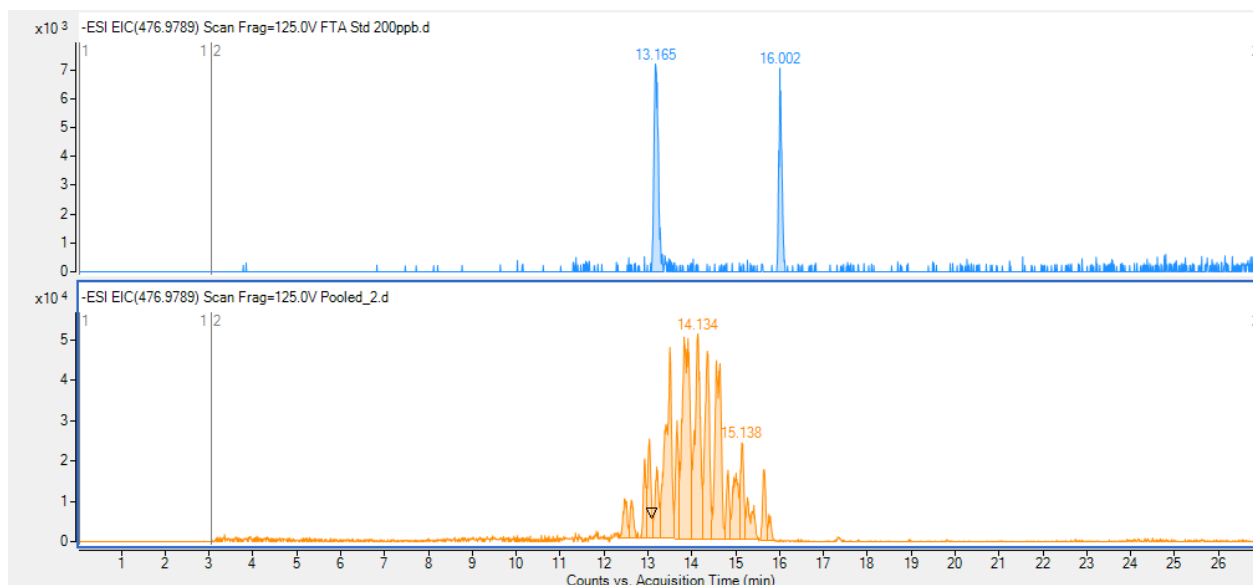

Top: Linear/branched standard 2-perfluorooctyl ethanoic acid (8:2 FTCA): Bottom: Pooled sample

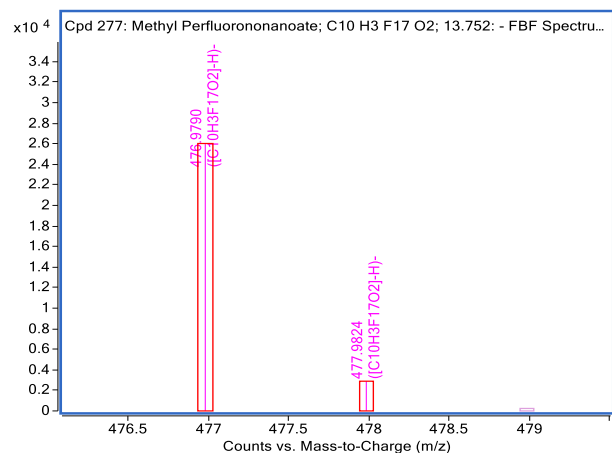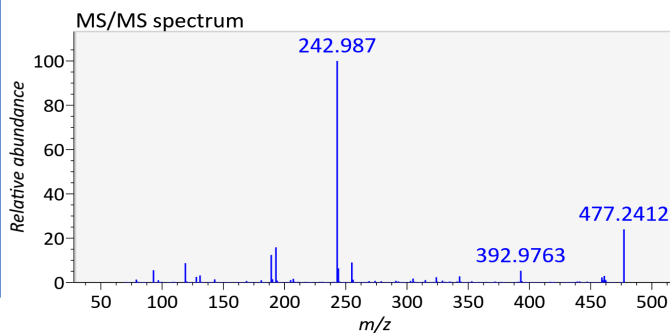

CE= in source fragmentation and 40V

| MS/MS ion (m/z)      | Molecular formula                           | Match    |
|----------------------|---------------------------------------------|----------|
| 118.9931             | C <sub>2</sub> F <sub>5</sub> <sup>-</sup>  | Standard |
| 242.9870             | C <sub>6</sub> F <sub>9</sub> <sup>-</sup>  | Standard |
| 392.9763 (in source) | C <sub>9</sub> F <sub>11</sub> <sup>-</sup> | Standard |

**Compound 18: H-substituted-PFCA (n=7)**

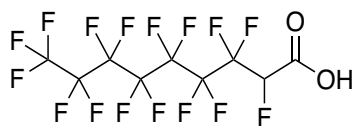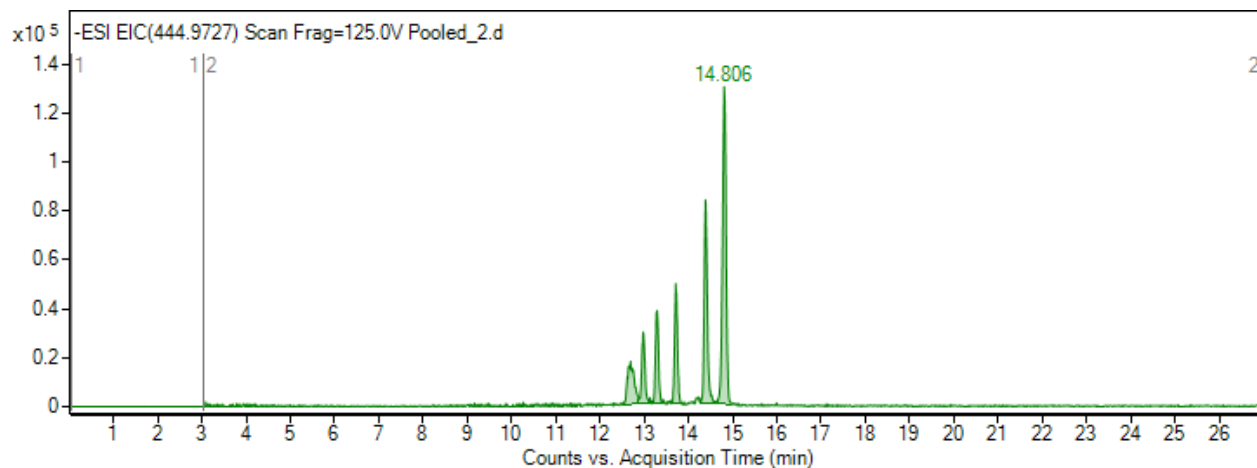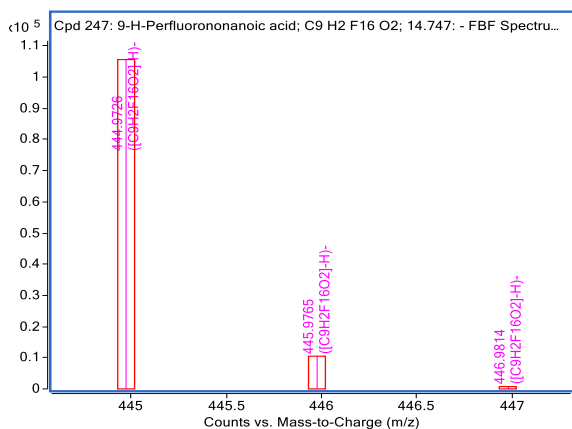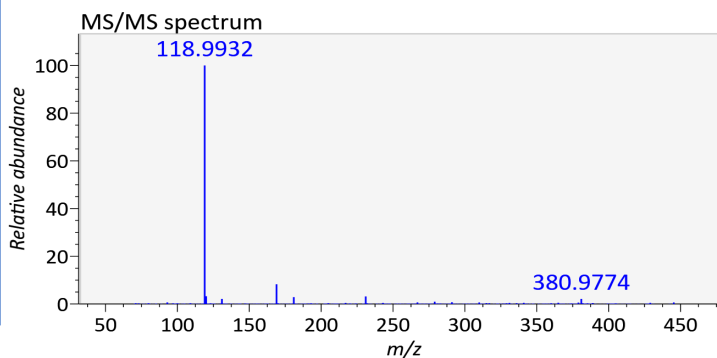

CE= in source fragmentation and 40V

| MS/MS ion (m/z)      | Molecular formula                           | Match               |
|----------------------|---------------------------------------------|---------------------|
| 118.9932             | C <sub>2</sub> F <sub>5</sub> <sup>-</sup>  | Fluoromatch Library |
| 380.9774 (in source) | C <sub>8</sub> F <sub>15</sub> <sup>-</sup> | -                   |

**Compound 19:** 9:1 FT carboxylic acid (n=9)

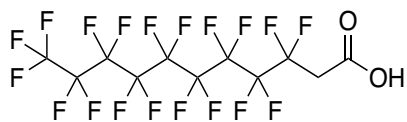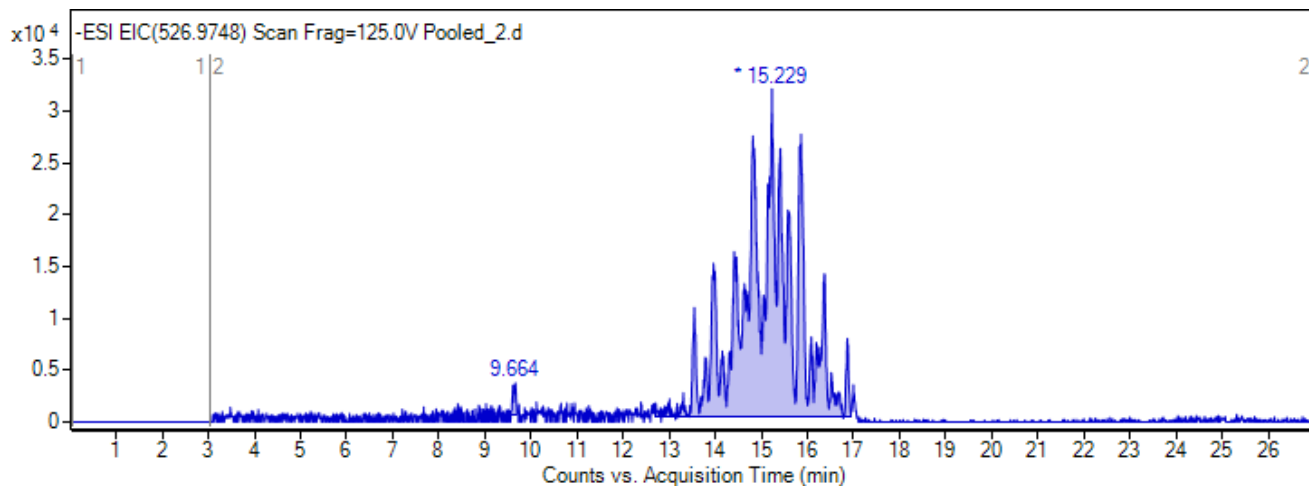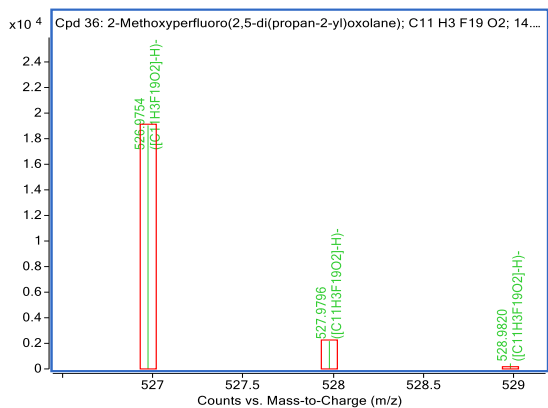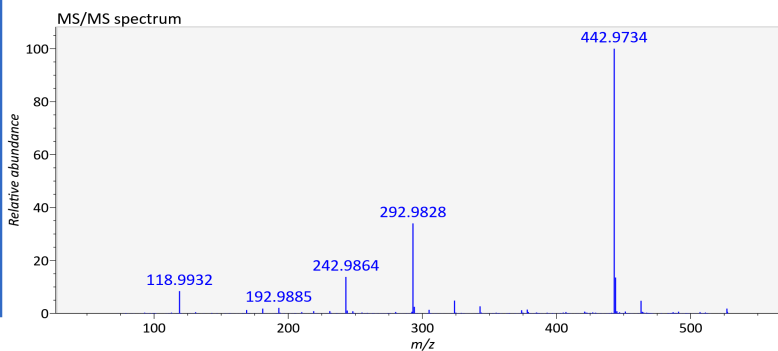

CE = 40V

| MS/MS ion (m/z) | Molecular formula                            | Match               |
|-----------------|----------------------------------------------|---------------------|
| 118.9932        | C <sub>2</sub> F <sub>5</sub> <sup>-</sup>   | Fluoromatch Library |
| 292.9828        | C <sub>7</sub> F <sub>11</sub> <sup>-</sup>  | -                   |
| 442.9734        | C <sub>10</sub> F <sub>17</sub> <sup>-</sup> | Fluoromatch Library |

**Compound 20:** H-substituted-PFCA (n=8)

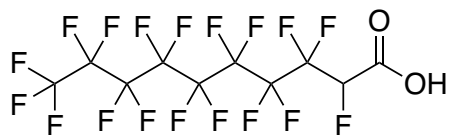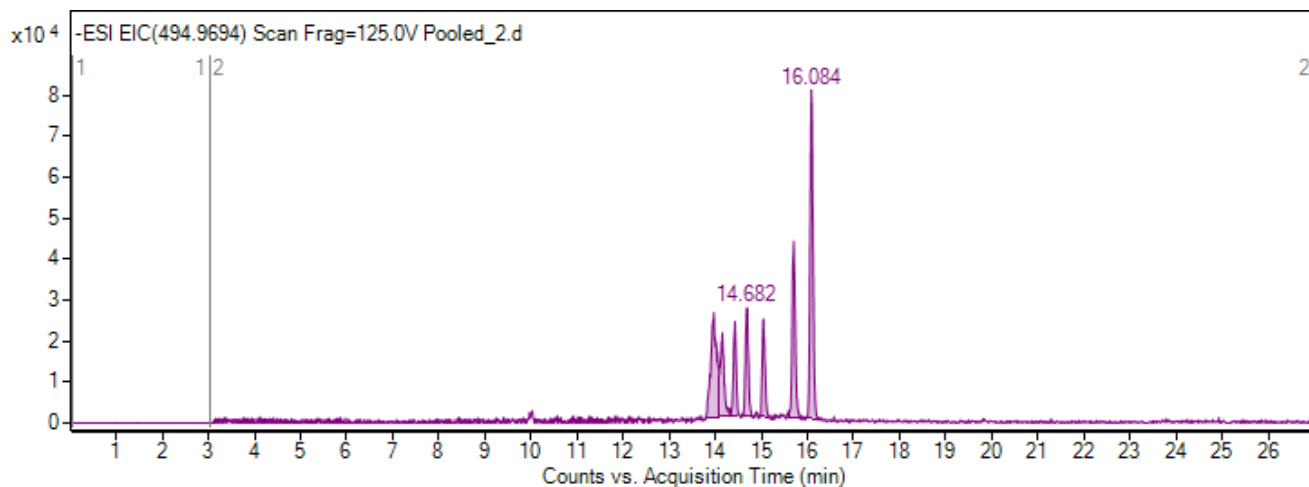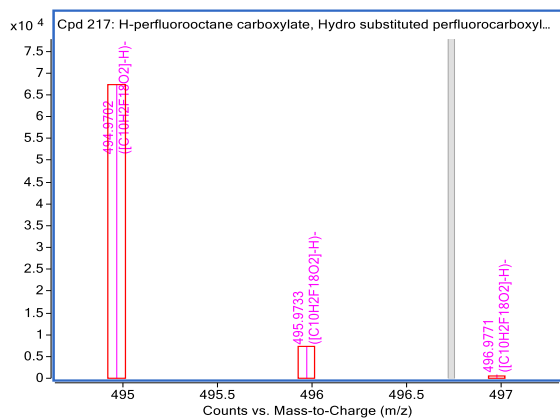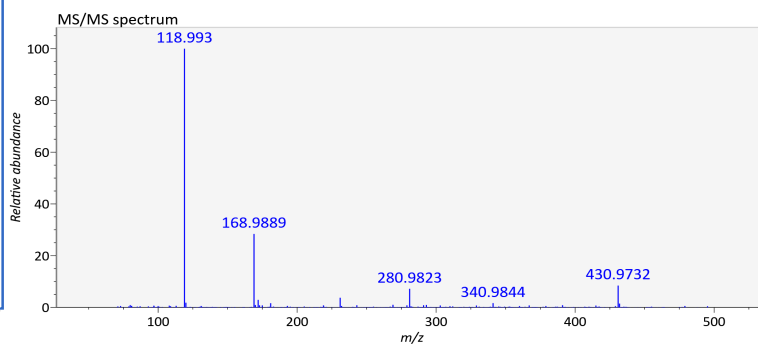

CE = 40V

| MS/MS ion (m/z) | Molecular formula                           | Match               |
|-----------------|---------------------------------------------|---------------------|
| 118.9932        | C <sub>2</sub> F <sub>5</sub> <sup>-</sup>  | Fluoromatch Library |
| 168.9889        | C <sub>3</sub> F <sub>7</sub> <sup>-</sup>  | Fluoromatch Library |
| 430.9732        | C <sub>9</sub> F <sub>17</sub> <sup>-</sup> | Fluoromatch Library |

**Compound 21: 10:1 FT carboxylic acid**

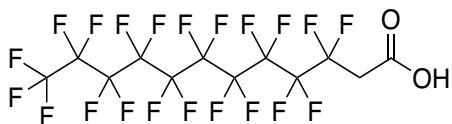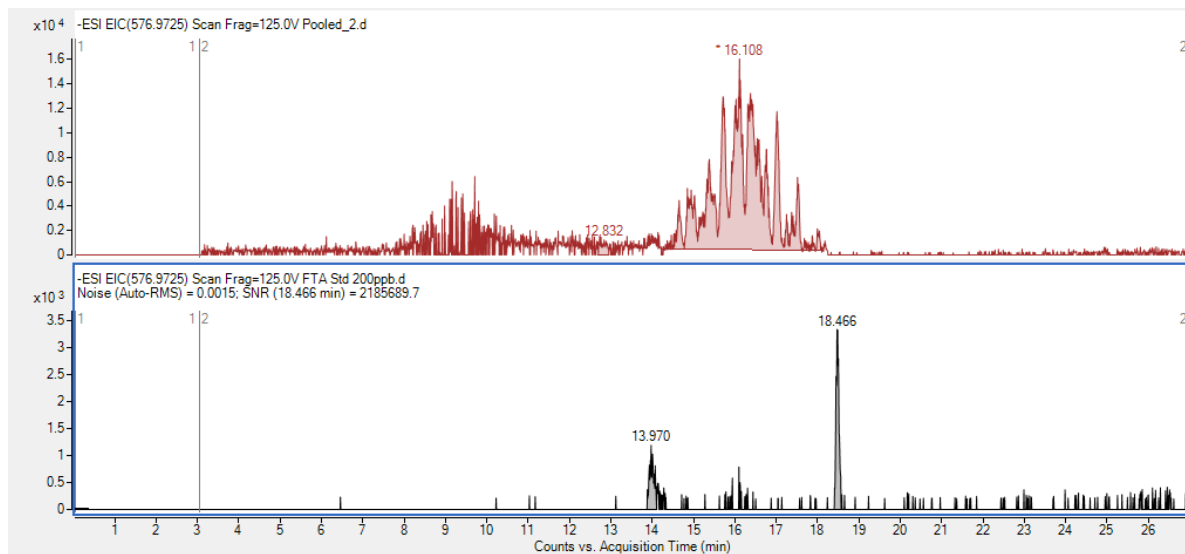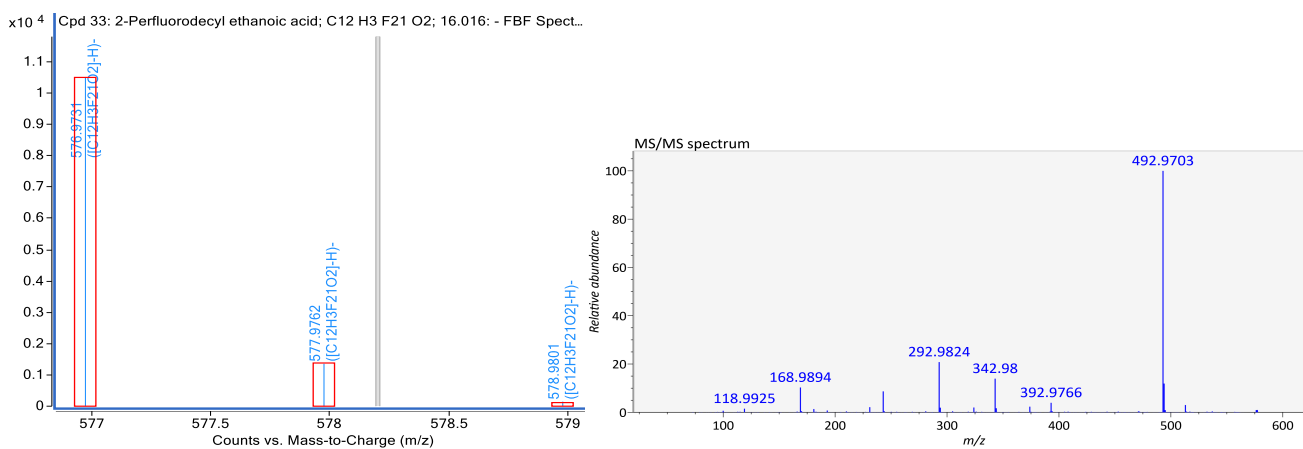

CE = in source and 40V

| MS/MS ion (m/z)      | Molecular formula                            | Match    |
|----------------------|----------------------------------------------|----------|
| 118.9932             | C <sub>2</sub> F <sub>5</sub> <sup>-</sup>   | Standard |
| 292.9828             | C <sub>7</sub> F <sub>11</sub> <sup>-</sup>  | Standard |
| 492.9703 (in source) | C <sub>11</sub> F <sub>19</sub> <sup>-</sup> | Standard |

**Compound 22: H-substituted-PFCA (n=9)**

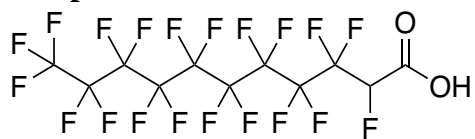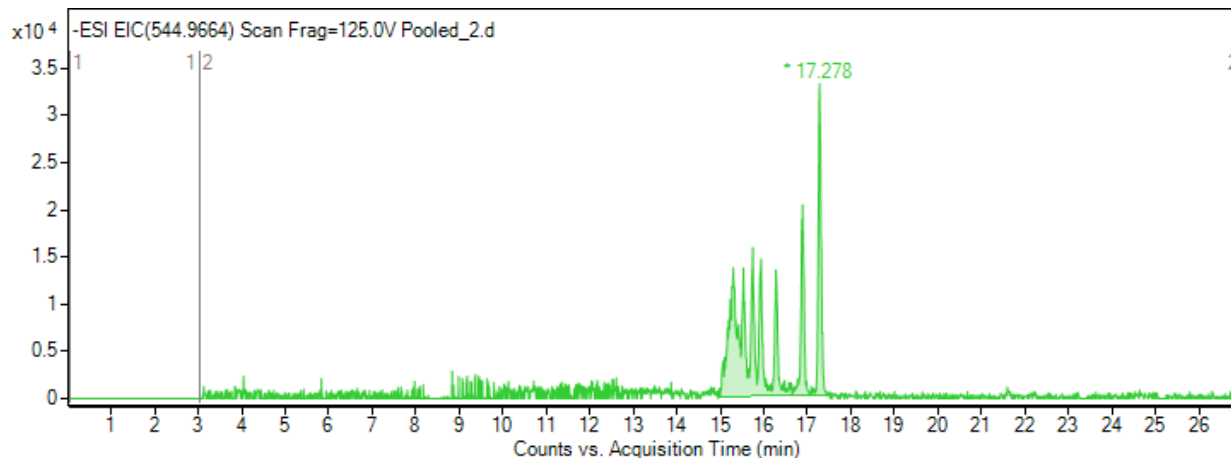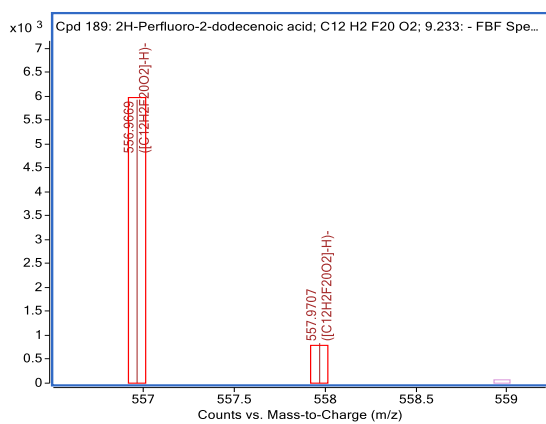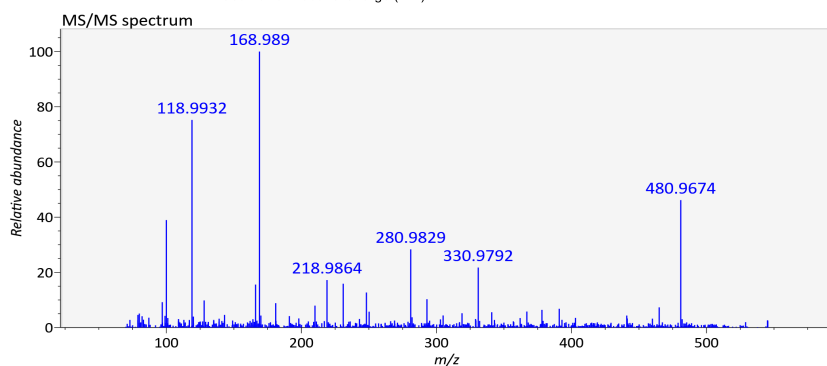

CE = 40V

| MS/MS ion (m/z) | Molecular formula                            | Match               |
|-----------------|----------------------------------------------|---------------------|
| 118.9932        | C <sub>2</sub> F <sub>5</sub> <sup>-</sup>   | Fluoromatch Library |
| 168.9889        | C <sub>3</sub> F <sub>7</sub> <sup>-</sup>   | Fluoromatch Library |
| 480.9674        | C <sub>10</sub> F <sub>19</sub> <sup>-</sup> | -                   |



**Compound 23: 11:1 FT carboxylic acid**

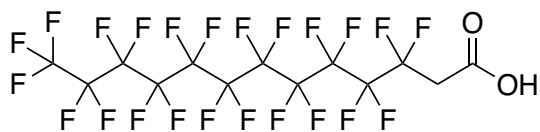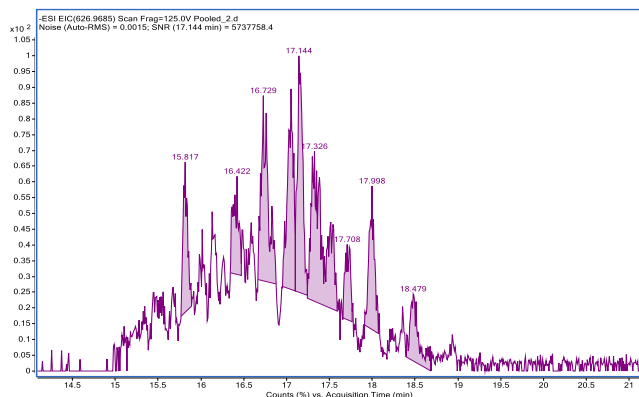

Abundance too low for accurate isotopic profile

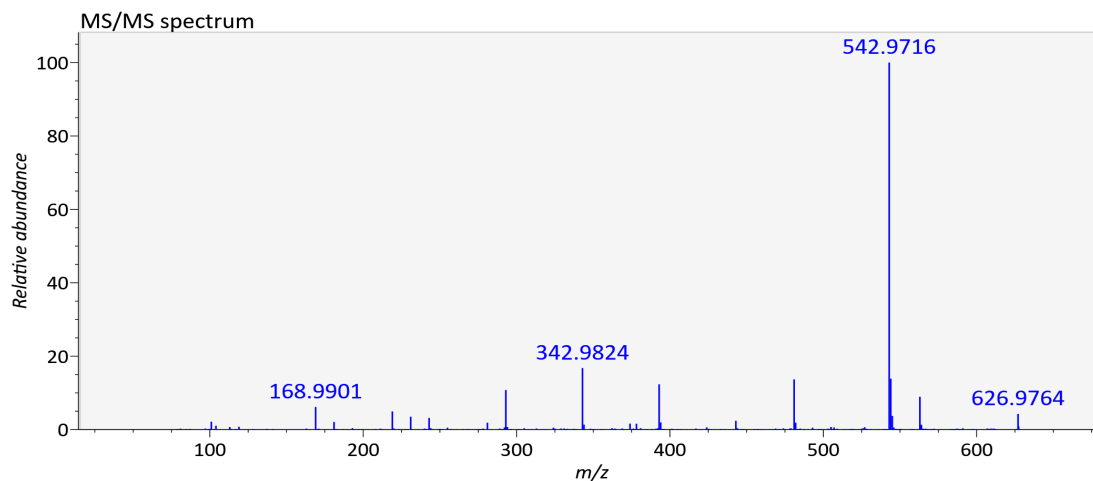

CE = 40V

| MS/MS ion (m/z) | Molecular formula                            | Match               |
|-----------------|----------------------------------------------|---------------------|
| 242.9880        | C <sub>6</sub> F <sub>9</sub> <sup>-</sup>   | Fluoromatch Library |
| 342.9824        | C <sub>8</sub> F <sub>13</sub> <sup>-</sup>  | Fluoromatch Library |
| 542.9716        | C <sub>12</sub> F <sub>21</sub> <sup>-</sup> | Fluoromatch Library |

**Compound 24: H-substituted-PFCA (n=10)**

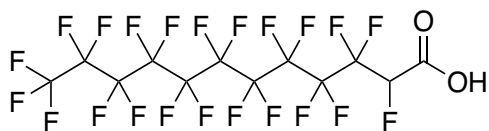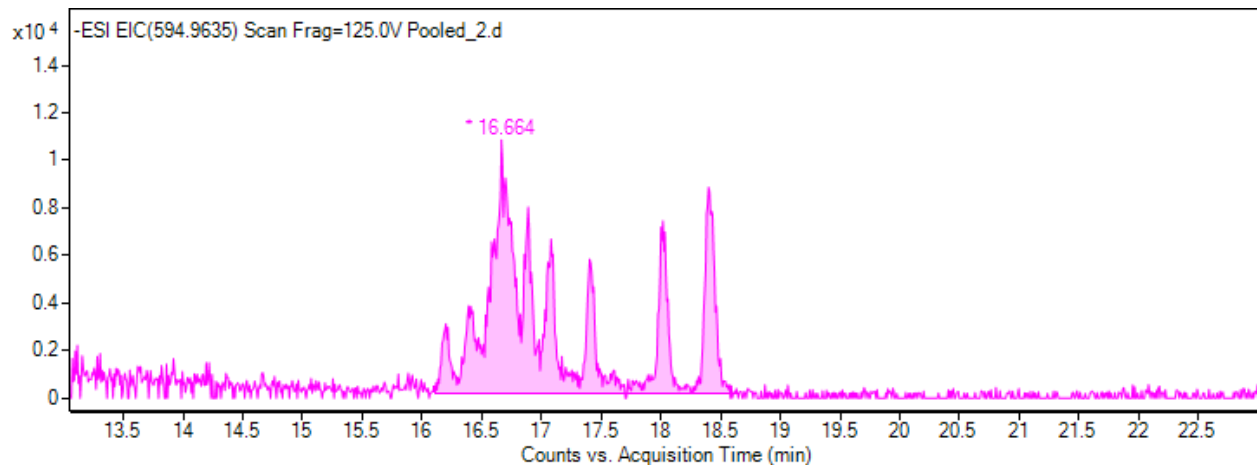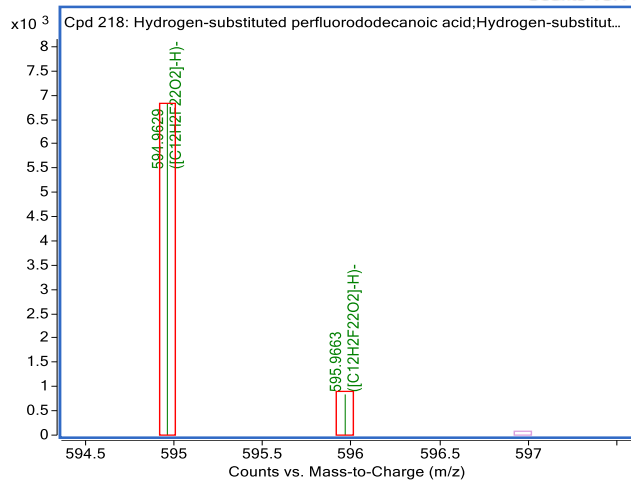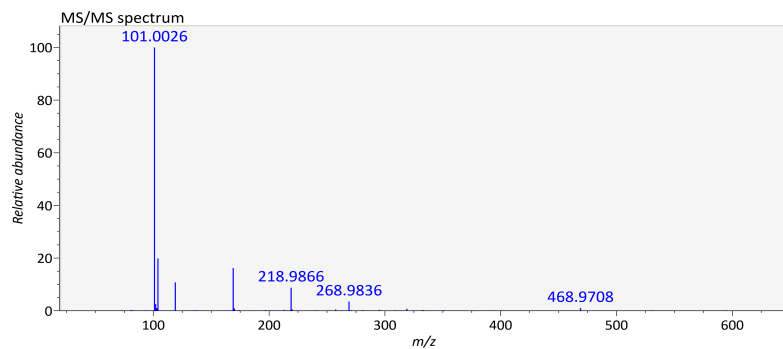

CE = 40V

| MS/MS ion (m/z) | Molecular formula | Match               |
|-----------------|-------------------|---------------------|
| 118.9928        | $C_2F_5^-$        | Fluoromatch Library |
| 168.9895        | $C_3F_7^-$        | Fluoromatch Library |
| 268.9836        | $C_5F_{11}^-$     | Fluoromatch Library |

## Appendix B: Air Mass Back Trajectories

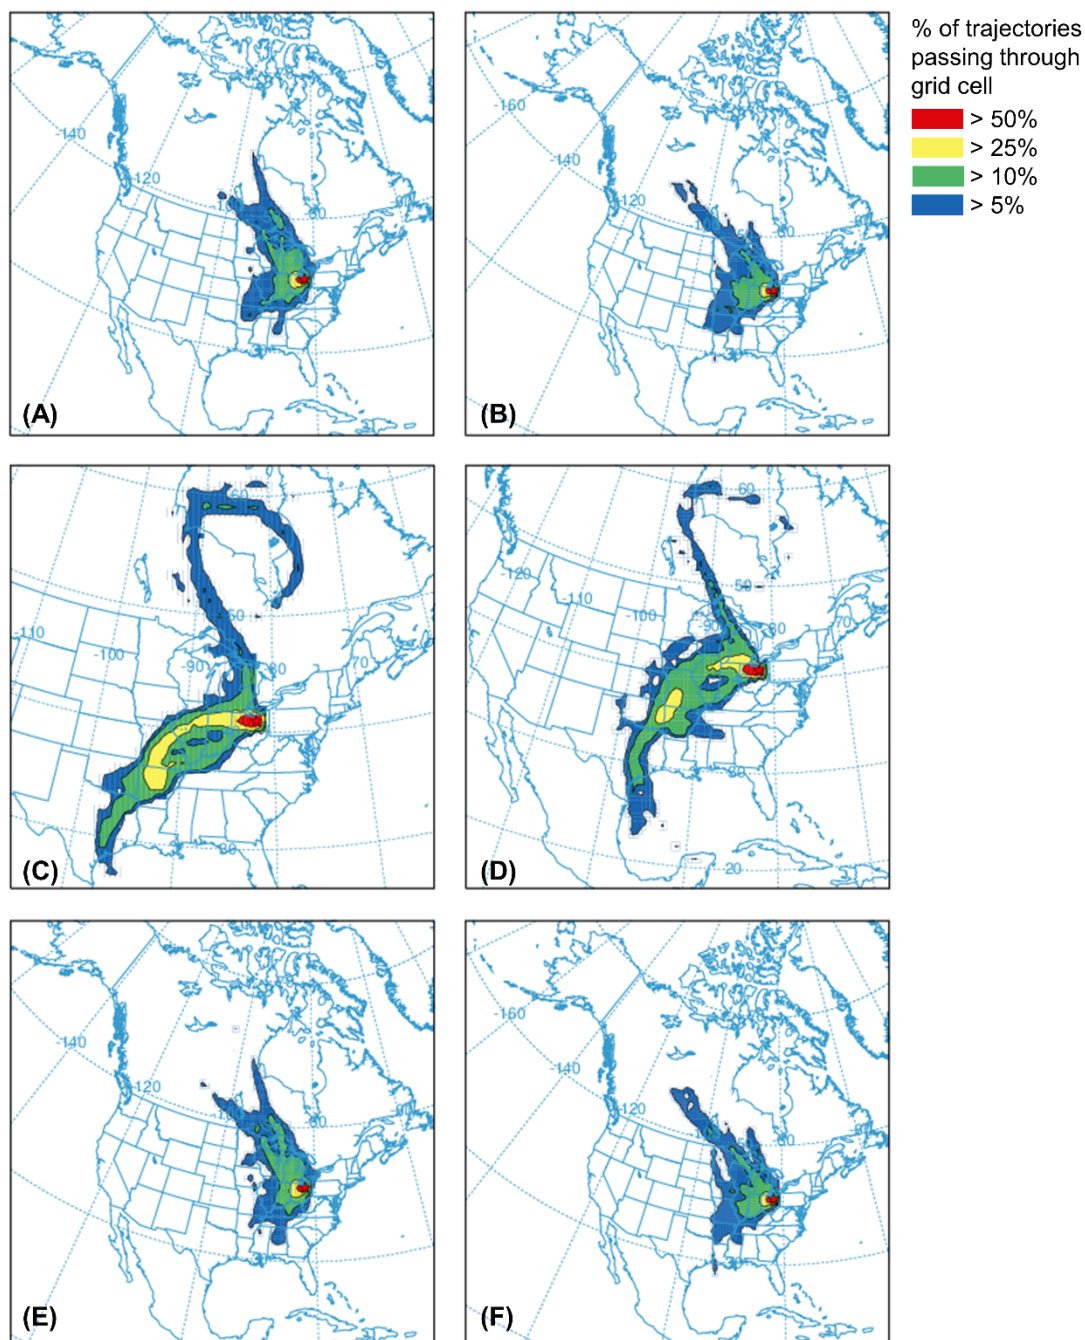

**Figure B1.** Frequency plots of air mass back trajectories at Ashland, OH for (A-B) all precipitation events ( $n = 10$ ); (C-D) precipitation events with  $\Sigma_{PFAS} > 50\%$  of the maximum deposition flux (4 July 2019); and (E-F) precipitation events with  $\Sigma_{PFAS} \leq 50\%$  of the maximum deposition flux ( $n = 9$ ). The altitude is 500 m above ground level for panels A/C/E and 1000 m above ground level for panels B/D/F. The color scheme indicates the fraction of trajectories crossing a grid cell:  $>50\%$  for red,  $>25\%$  for yellow,  $>10\%$  for green, and  $>5\%$  for blue. See the methods section of the main text for additional HYSPLIT parameters.

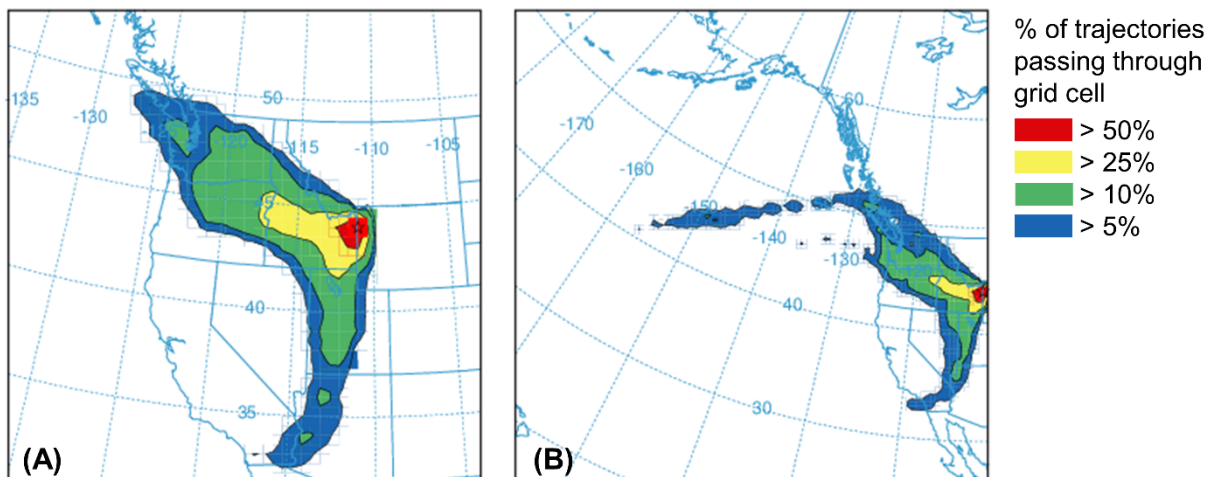

**Figure B2.** Frequency plots of air mass back trajectories at Jackson Hole, WY for all precipitation events ( $n = 3$ ) at an altitude of 500 m above ground level (A) and 1000 m above ground level (B). The color scheme indicates the fraction of trajectories crossing a grid cell: >50% for red, >25% for yellow, >10% for green, and >5% for blue. See the methods section of the main text for additional HYSPLIT parameters.

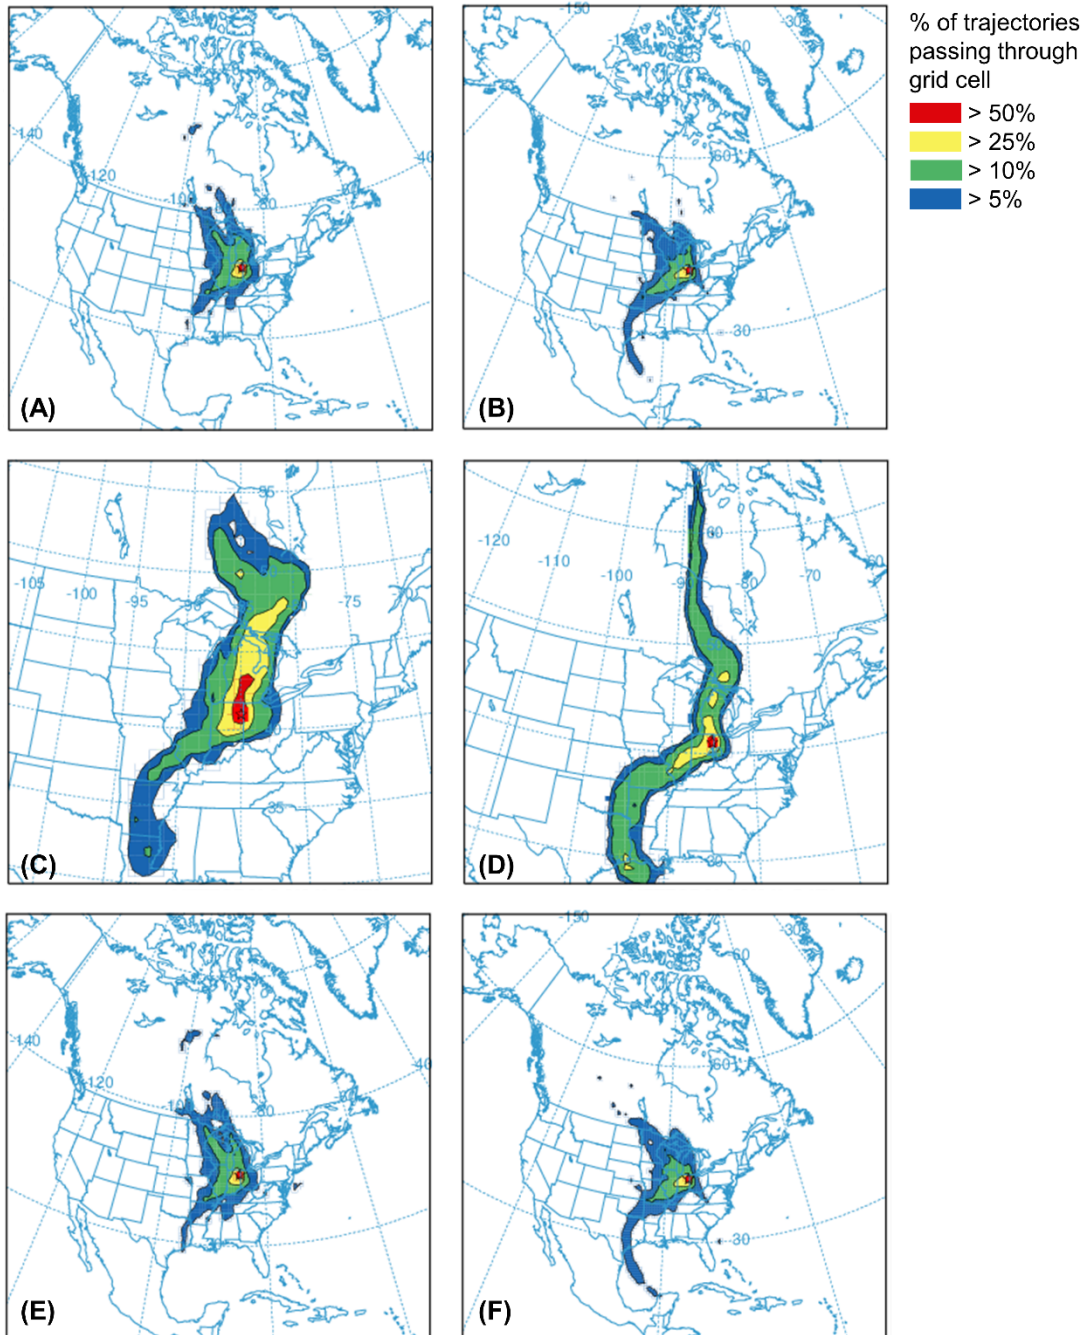

**Figure B3.** Frequency plots of air mass back trajectories at Rockford, OH for (A-B) all precipitation events ( $n = 8$ ); (C-D) precipitation events with  $\Sigma_{PFAS} > 50\%$  of the maximum deposition flux (23 June 2019); and (E-F) precipitation events with  $\Sigma_{PFAS} \leq 50\%$  of the maximum deposition flux ( $n = 7$ ). The altitude is 500 m above ground level for panels A/C/E and 1000 m above ground level for panels B/D/F. The color scheme indicates the fraction of trajectories crossing a grid cell: >50% for red, >25% for yellow, >10% for green, and >5% for blue. See the methods section of the main text for additional HYSPLIT parameters.



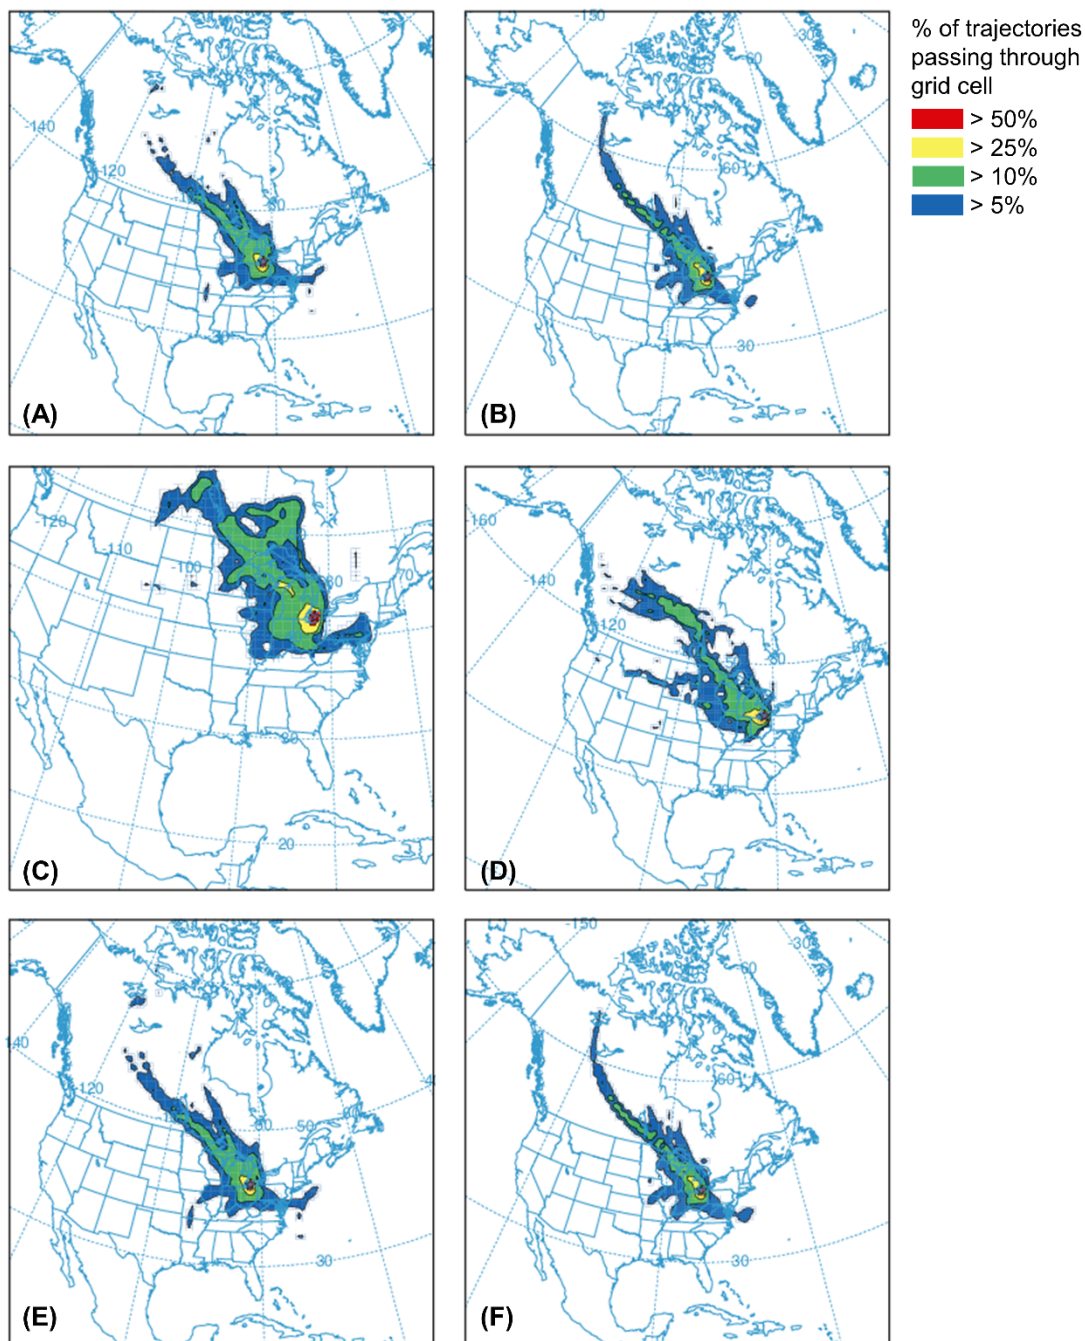

**Figure B4.** Frequency plots of air mass back trajectories at Shaker Heights, OH for (A-B) all precipitation events ( $n = 10$ ); (C-D) precipitation events with  $\Sigma_{\text{PFAS}} > 50\%$  of the maximum deposition flux (16 July 2019); and (E-F) precipitation events with  $\Sigma_{\text{PFAS}} \leq 50\%$  of the maximum deposition flux ( $n = 9$ ). The altitude is 500 m above ground level for panels A/C/E and 1000 m above ground level for panels B/D/F. The color scheme indicates the fraction of trajectories crossing a grid cell:  $>50\%$  for red,  $>25\%$  for yellow,  $>10\%$  for green, and  $>5\%$  for blue. See the methods section of the main text for additional HYSPLIT parameters.

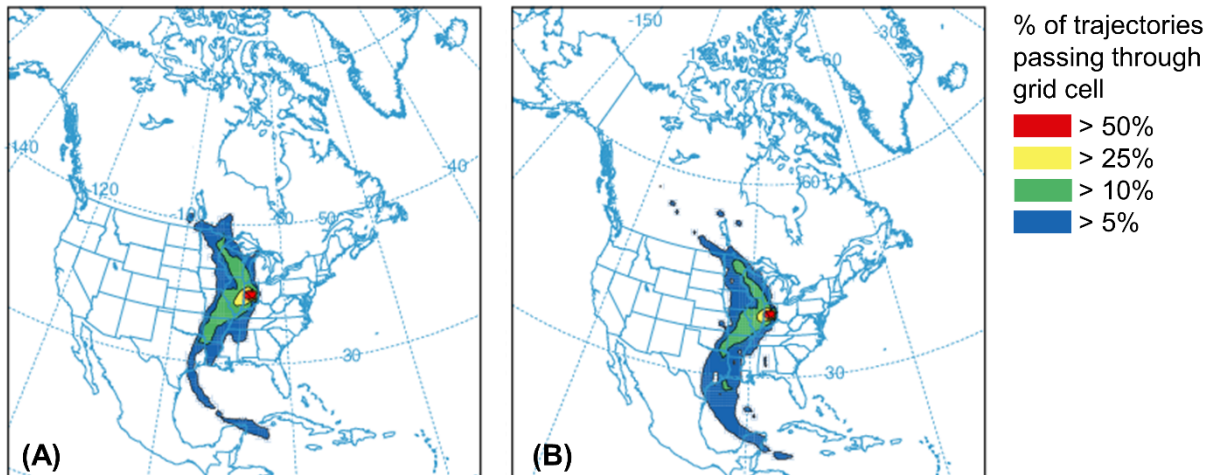

**Figure B5.** Frequency plots of air mass back trajectories at Whitestown, IN for all precipitation events ( $n = 5$ ) at an altitude of 500 m above ground level (A) and 1000 m above ground level (B). The color scheme indicates the fraction of trajectories crossing a grid cell: >50% for red, >25% for yellow, >10% for green, and >5% for blue. See the methods section of the main text for additional HYSPLIT parameters.

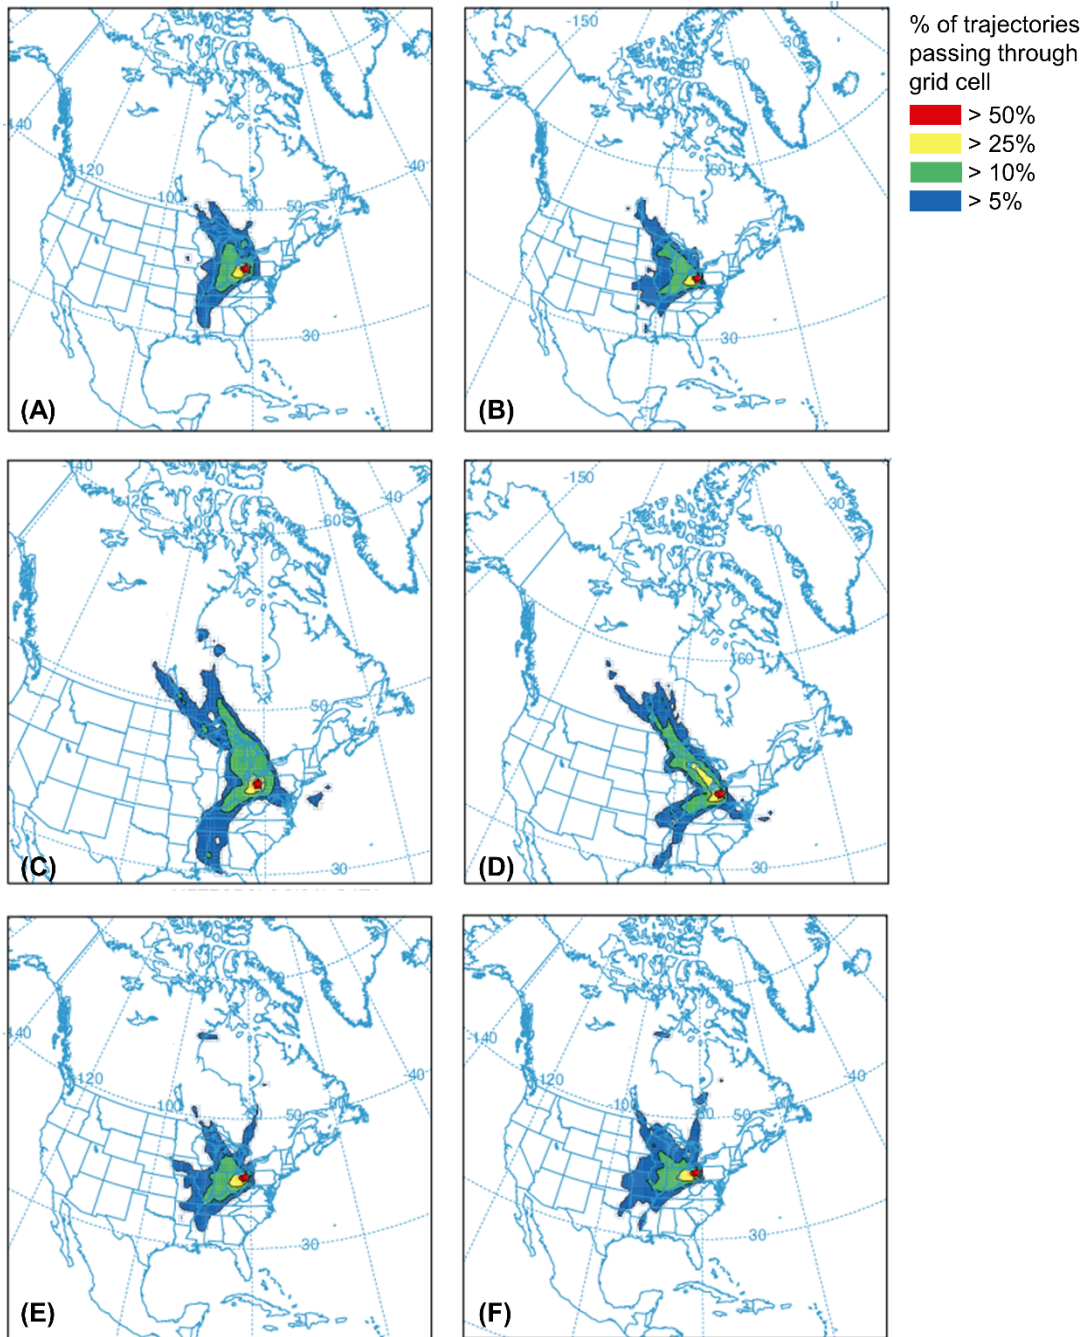

**Figure B6.** Frequency plots of air mass back trajectories at Willoughby, OH for (A-B) all precipitation events ( $n = 10$ ); (C-D) precipitation events with  $\Sigma_{\text{PFAS}} > 50\%$  of the maximum deposition flux (13 June, 20 June, 6 Aug, and 7 Aug 2019); and (E-F) precipitation events with  $\Sigma_{\text{PFAS}} \leq 50\%$  of the maximum deposition flux ( $n = 6$ ). The altitude is 500 m above ground level for panels A/C/E and 1000 m above ground level for panels B/D/F. The color scheme indicates the fraction of trajectories crossing a grid cell:  $>50\%$  for red,  $>25\%$  for yellow,  $>10\%$  for green, and  $>5\%$  for blue. See the methods section of the main text for additional HYSPLIT parameters.



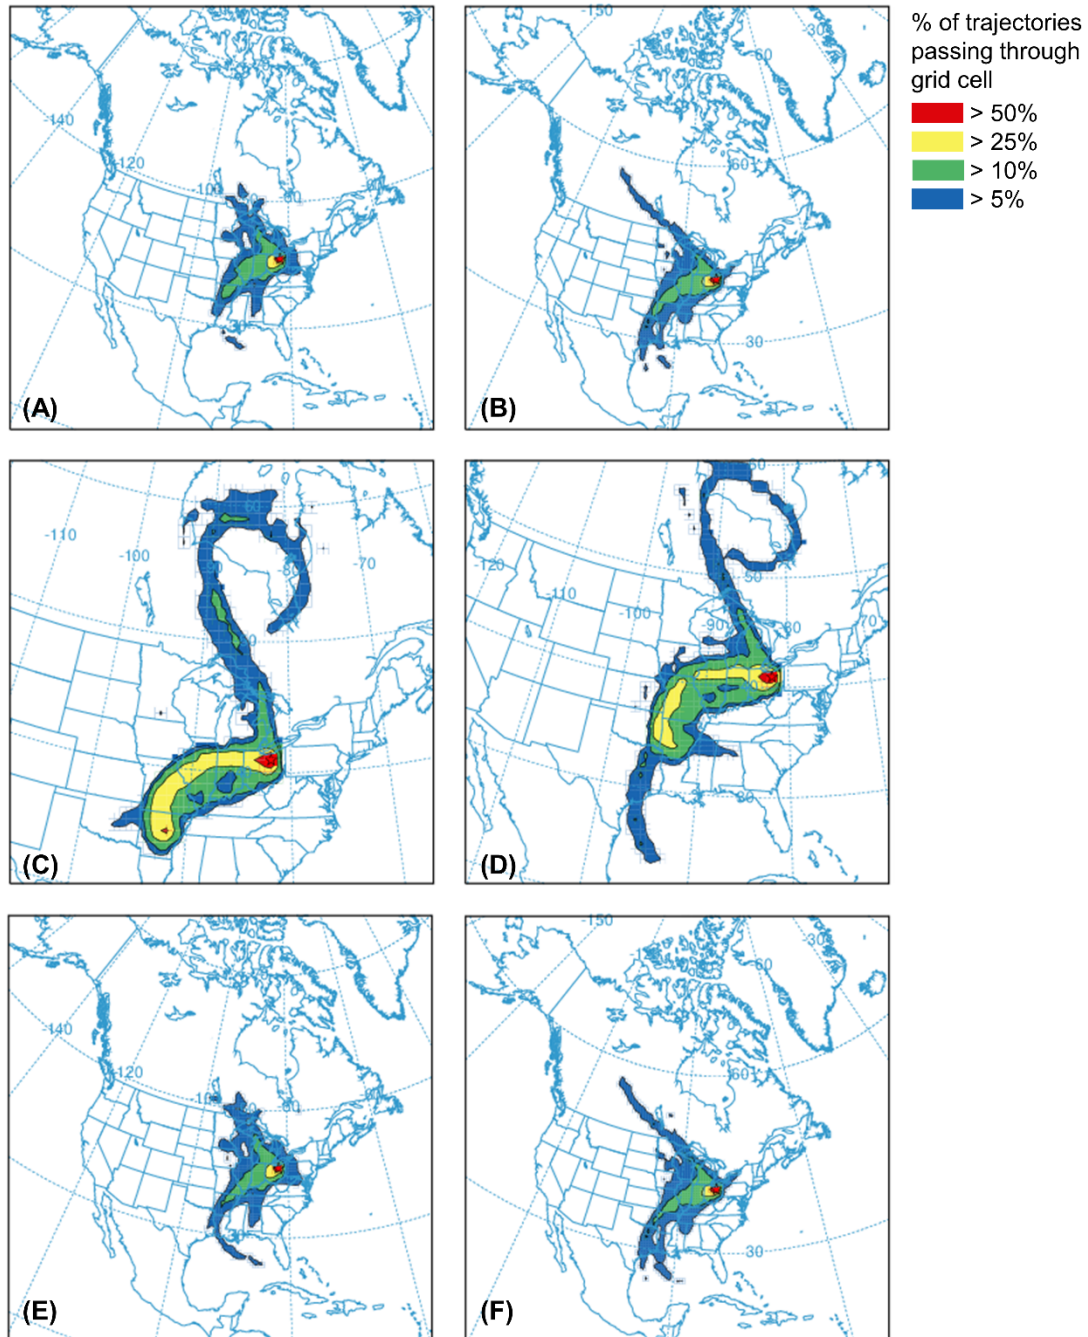

**Figure B7.** Frequency plots of air mass back trajectories at Wooster, OH for (A-B) all precipitation events ( $n = 10$ ); (C-D) precipitation events with  $\Sigma_{PFAS} > 50\%$  of the maximum deposition flux (6 July 2019); and (E-F) precipitation events with  $\Sigma_{PFAS} \leq 50\%$  of the maximum deposition flux ( $n = 9$ ). The altitude is 500 m above ground level for panels A/C/E and 1000 m above ground level for panels B/D/F. The color scheme indicates the fraction of trajectories crossing a grid cell:  $>50\%$  for red,  $>25\%$  for yellow,  $>10\%$  for green, and  $>5\%$  for blue. See the methods section of the main text for additional HYSPLIT parameters.

## References

- 1 K. A. Pike, P. L. Edmiston, J. J. Morrison and J. A. Faust, Correlation Analysis of Perfluoroalkyl Substances in Regional U.S. Precipitation Events, *Water Res.*, 2021, **190**, 116685.
- 2 U.S. Environmental Protection Agency, *Method 533: Determination of Per- and Polyfluoroalkyl Substances in Drinking Water by Isotope Dilution Anion Exchange Solid Phase Extraction and Liquid Chromatography/Tandem Mass Spectrometry*, 2019.
- 3 U.S. Environmental Protection Agency, *Method 537.1: Determination of Selected Per- and Polyfluorinated Alkyl Substances in Drinking Water by Solid Phase Extraction and Liquid Chromatography/Tandem Mass Spectrometry (LC/MS/MS)*, 2018.
- 4 Edward. Kendrick, A Mass Scale Based on  $\text{CH}_2 = 14.0000$  for High Resolution Mass Spectrometry of Organic Compounds., *Anal. Chem.*, 1963, **35**, 2146–2154.
- 5 B. Bugsel and C. Zwiener, LC-MS screening of poly- and perfluoroalkyl substances in contaminated soil by Kendrick mass analysis, *Anal. Bioanal. Chem.*, 2020, **412**, 4797–4805.
- 6 B. F. Scott, C. Spencer, S. A. Mabury and D. C. G. Muir, Poly and Perfluorinated Carboxylates in North American Precipitation, *Environ. Sci. Technol.*, 2006, **40**, 7167–7174.
- 7 M. Loewen, T. Halldorson, F. Wang and G. Tomy, Fluorotelomer Carboxylic Acids and PFOS in Rainwater from an Urban Center in Canada, *Environ. Sci. Technol.*, 2005, **39**, 2944–2951.
- 8 S. Taniyasu, K. Kannan, L. W. Y. Yeung, K. Y. Kwok, P. K. S. Lam and N. Yamashita, Analysis of trifluoroacetic acid and other short-chain perfluorinated acids (C2–C4) in precipitation by liquid chromatography–tandem mass spectrometry: Comparison to patterns of long-chain perfluorinated acids (C5–C18), *Anal. Chim. Acta*, 2008, **619**, 221–230.
- 9 L. Zhao, M. Zhou, T. Zhang and H. Sun, Polyfluorinated and Perfluorinated Chemicals in Precipitation and Runoff from Cities Across Eastern and Central China, *Arch. Environ. Contam. Toxicol.*, 2013, **64**, 198–207.
